# Supplementary material for: Contribution of Coastal Retrogressive Thaw Slumps to theNearshore Organic Carbon budget along the Yukon Coast
Source: Copernicus journal article supplement (doi:10.5194/bg-2017-437), 2017-10-26
Supplement: Supplementary file 1 [file S1_TableS1.xlsx]

## Sheet: RTSs_volumes
SOC and DOC from RTSs
Sources
1	Ramage et al., 2017	Ramage, J.L., Irrgang, A.M., Morgenstern, A., Lantuit, H.: Contribution of Retrogressive Thaw Slumps to the Nearshore Carbon Budget, Submitted to Biogeosciences
2	Couture and Pollard, 2017	Couture, N.J. and Pollard, W.H.: A Model for Quantifying Ground‐Ice Volume, Yukon Coast, Western Arctic Canada. Permafrost and Periglacial Processes, 2017.
3	Tanski et al., 2016	Tanski, G., Couture, N., Lantuit, H., Eulenburg, A. and Fritz, M.: Eroding permafrost coasts release low amounts of dissolved organic carbon (DOC) from ground ice into the nearshore zone of the Arctic Ocean. Global Biogeochemical Cycles, 30(7), pp.1054-1068, 2016.
															DOC																											SOC
Source		1	1	1	1	1	1	1	1	1	1	1	1	2	1	1	1	3	3	3	3	3	3	3	3	3	3	3	3	1	1	1	1	1	1	1	1	1	1	1	1	1	1	1	2	2	2	2	2
Variable	RTS number	Coastal Segment	Geologic Unit	RTS Type	RTS lobe width	RTS initiated after 1972	RTS mean elevation	RTS mean slope	RTS area	RTS mean elevation (LiDAR)	RTS interpolated mean elevation (Spline)	RTS mean elevation difference (spline-LiDAR)	RTS eroded volume material	RTS eroded volume material per year	RTS total Ice Volume	RTS Total Ice Volume above 1 m	RTS Total Ice Volume below 1 m	Concentration of DOC in Wedge Ice	Concentration of DOC in Massive Ice	Concentration of DOC in Non-Massive Ice	Concentration of DOC in Ice (total)	DOC stocks in Wedge Ice	DOC stocks in Massive Ice	DOC stocks in Non_Massive Ice	DOC stocks in Ice	DOC flux in Wedge Ice	DOC flux in Massive Ice	DOC flux in Non_Massive Ice	DOC flux in Ice	RTS volume Ice Wedge	RTS volume Massive Ice	RTS volume Non_Massive Ice	RTS volume Ice (total)	RTS DOCstock in Wedge Ice	RTS DOC stock in Massive Ice	RTS DOC stock in Non_Massive Ice	RTS DOC stock in Ice	RTS DOC flux in Wedge Ice	RTS DOC flux in Massive Ice	RTS DOC flux in Non_Massive Ice	RTS DOC flux in Ice	RTS volume Sediments	RTS volume Sediments above 1m	RTS volume Sediments below 1m	SOC stock above 1 m	SOC stock below 1 m	SOC stock (total)	Cliff Heigh of the coastal segment
Abbreviation	TARGET_F1	Segment_na	Geo_unit	Type	Coastal_le	Join_70	Z_MEAN	S_MEAN	area	LID_ZMEAN	SPL_ZMEAN	SPL_LID	volume	TIV	TIVRTS	TIVURTS	TIVBRTS	C_IW	C_MIB	C_NMI	C_TI	S_DOCWI	S_DOCMIB	S_DOCNMI	S_DOCTI	F_DOCWI	F_DOCMIB	F_DOCNMI	F_DOCTI	C_WI_RTS	C_MIB_RTS	C_NMI_RTS	C_TI_RTS	S_DOCWI_RTS	S_DOCMIB_RTS	S_DOCNMI_RTS	S_DOCTI_RTS	F_DOCWI_RTS	F_DOCMIB_RTS	F_DOCNMI_RTS	F_DOCTI_RTS	TVSRTS	TVSURTS	TVSBRTS	McU	McB	McT	Bh	Bh-1
Unit					m		m	°	m2	m	m	m	m3	%	m3	m3	m3	%	%	%	%	g m3	g m3	g m3	g m3	106 g / yr	106 g / yr	106 g / yr	106 g / yr	m3	m3	m3	m3	g	g	g	g	106 g	106 g	106 g	106 g	m3	m3	m3	kg	kg	kg	m	m
	1	Herschel Island E	Mr	active	13.5	YES	17.05	11.36	1111.74	17.25	17.83	0.59	655.927	0.5552	364.17	617.238	0	0.04375	0.236218	0.275366	0.555333	0.321545	0.238714	14.8498	15.4101	0.0673777	0.0500211	3.11169	3.22909	15.9325	86.0235	100.28	202.236	5.123	20.535	1489.14	3116.48	0.000117097	8.69327e-05	0.00540787	0.0056119	291.756	494.502	0	34	273	307	25	24
	4	Herschel Island E	Mr	active	423.39	NO	10.25	6.5	73562.5	10.27	12.23	1.96	144182	0.5552	80050.1	40841.9	39208.2	0.04375	0.236218	0.275366	0.555333	0.321545	0.238714	14.8498	15.4101	0.0673777	0.0500211	3.11169	3.22909	3502.19	18909.2	22043	44454.5	1126.11	4513.91	327336	685048	0.0257397	0.0191091	1.18873	1.23358	64132.3	32720.6	31411.8	34	273	307	25	24
	7	Herschel Island E	Mr	active	10.82	NO	22.38	14.71	2394.5	22.79	24.23	1.45	3472.03	0.5552	1927.67	1329.43	598.242	0.04375	0.236218	0.275366	0.555333	0.321545	0.238714	14.8498	15.4101	0.0673777	0.0500211	3.11169	3.22909	84.3355	455.349	530.814	1070.5	27.1177	108.698	7882.5	16496.5	0.000619832	0.000460162	0.0286256	0.0297056	1544.36	1065.07	479.283	34	273	307	25	24
	8	Herschel Island E	Mr	active	74.73	NO	20.49	11.31	12449.2	21.07	21.45	0.37	4606.2	0.5552	2557.36	6911.78	0	0.04375	0.236218	0.275366	0.555333	0.321545	0.238714	14.8498	15.4101	0.0673777	0.0500211	3.11169	3.22909	111.885	604.094	704.209	1420.19	35.9759	144.206	10457.4	21885.2	0.000822306	0.000610479	0.0379764	0.0394092	2048.84	5537.4	0	34	273	307	25	24
	9	Herschel Island E	Mr	active	677.33	NO	21.01	8.94	208170	21.38	23.73	2.35	489200	0.5552	271604	115576	156028	0.04375	0.236218	0.275366	0.555333	0.321545	0.238714	14.8498	15.4101	0.0673777	0.0500211	3.11169	3.22909	11882.7	64157.6	74790.4	150831	3820.81	15315.3	1.11062e+06	2.32431e+06	0.0873328	0.0648357	4.03327	4.18544	217596	92594.1	125002	34	273	307	25	24
	11	Herschel Island E	Mr	active	44.65	NO	8.02	17.23	2072.2	8.15	10.96	2.81	5822.88	0.5552	3232.86	1150.49	2082.38	0.04375	0.236218	0.275366	0.555333	0.321545	0.238714	14.8498	15.4101	0.0673777	0.0500211	3.11169	3.22909	141.438	763.659	890.22	1795.32	45.4786	182.297	13219.6	27666	0.00103951	0.000771731	0.0480075	0.0498187	2590.02	921.715	1668.3	34	273	307	25	24
	12	Herschel Island E	Mr	active	75.74	NO	9.96	15.3	5432.45	10.1	15.08	4.98	27053.6	0.5552	15020.2	3016.1	12004.1	0.04375	0.236218	0.275366	0.555333	0.321545	0.238714	14.8498	15.4101	0.0673777	0.0500211	3.11169	3.22909	657.132	3548.03	4136.04	8341.2	211.297	846.965	61419.5	128539	0.00482966	0.00358553	0.223047	0.231462	12033.4	2416.35	9617.09	34	273	307	25	24
	13	Herschel Island E	Mr	active	154.41	NO	9.32	7.33	20720.1	10.1	15.08	4.98	103186	0.5552	57288.9	11503.8	45785.1	0.04375	0.236218	0.275366	0.555333	0.321545	0.238714	14.8498	15.4101	0.0673777	0.0500211	3.11169	3.22909	2506.39	13532.7	15775.4	31814.5	805.918	3230.44	234262	490264	0.018421	0.0136757	0.850732	0.882828	45897.2	9216.3	36680.9	34	273	307	25	24
	14	Herschel Island E	Mr	active	22.8	YES	16.39	11.67	1281.76	16.51	21.59	5.08	6511.34	0.5552	3615.1	711.633	2903.46	0.04375	0.236218	0.275366	0.555333	0.321545	0.238714	14.8498	15.4101	0.0673777	0.0500211	3.11169	3.22909	158.16	853.949	995.474	2007.58	50.8557	203.85	14782.6	30937.1	0.00116242	0.000862976	0.0536836	0.055709	2896.24	570.127	2326.12	34	273	307	25	24
	15	Herschel Island E	Mr	active	201.6	NO	24.04	9.6	47807.3	24.15	25.43	1.28	61193.4	0.5552	33974.6	26542.6	7431.94	0.04375	0.236218	0.275366	0.555333	0.321545	0.238714	14.8498	15.4101	0.0673777	0.0500211	3.11169	3.22909	1486.39	8025.39	9355.43	18867.2	477.941	1915.78	138927	290746	0.0109244	0.00811022	0.504517	0.523552	27218.8	21264.7	5954.12	34	273	307	25	24
	16	Herschel Island E	Mr	active	201.6	NO	24.58	9.52	59385.1	24.15	25.43	1.28	76012.9	0.5552	42202.4	32970.6	9231.77	0.04375	0.236218	0.275366	0.555333	0.321545	0.238714	14.8498	15.4101	0.0673777	0.0500211	3.11169	3.22909	1846.35	9968.94	11621.1	23436.4	593.686	2379.73	172571	361157	0.01357	0.0100743	0.626698	0.650342	33810.5	26414.5	7396.05	34	273	307	25	24
	17	Herschel Island E	Mr	active	3.65	YES	20.43	9.52	1785.02	20.57	21.75	1.18	2106.32	0.5552	1169.43	991.043	178.388	0.04375	0.236218	0.275366	0.555333	0.321545	0.238714	14.8498	15.4101	0.0673777	0.0500211	3.11169	3.22909	51.1626	276.24	322.021	649.424	16.4511	65.9425	4781.96	10007.7	0.000376025	0.00027916	0.0173659	0.018021	936.893	793.977	142.916	34	273	307	25	24
	18	Herschel Island N	Mr	active	10.3	YES	24.07	16.74	1897.56	24.29	24.83	0.54	1024.68	0.502	514.391	952.575	0	0.0178646	0.068358	0.415667	0.50189	0.131298	0.0690805	22.416	22.6164	0.0921362	0.0484763	15.7301	15.8707	9.18937	35.1627	213.815	258.167	1.20654	2.42906	4792.88	5838.8	6.75382e-05	3.55344e-05	0.0115306	0.0116336	510.292	944.985	0	30	545	575	60	59
	19	Herschel Island S	Mr	active	35.45	NO	6.45	8.19	4131.36	6.46	9.13	2.67	11030.7	0.6267	6912.96	2589.12	4323.84	0.139205	0	0.487576	0.626781	1.0231	0	26.2939	27.317	0.0683122	0	1.75564	1.82395	962.315	0	3370.59	4332.91	984.543	0	88625.9	118362	0.00707263	0	0.181768	0.188841	4117.77	1542.24	2575.54	36	47	83	6	5
	22	Herschel Island S	Mr	active	44.75	YES	5.71	14.65	1785.71	5.72	6.33	0.62	1107.14	0.6267	693.845	1119.1	0	0.139205	0	0.487576	0.626781	1.0231	0	26.2939	27.317	0.0683122	0	1.75564	1.82395	96.5863	0	338.302	434.888	98.8173	0	8895.27	11879.8	0.000709871	0	0.0182439	0.0189537	413.295	666.606	0	36	47	83	6	5
	24	Herschel Island S	Mr	active	44.66	NO	3.55	11	1102.01	3.72	4.3	0.58	639.166	0.6267	400.565	690.63	0	0.139205	0	0.487576	0.626781	1.0231	0	26.2939	27.317	0.0683122	0	1.75564	1.82395	55.7605	0	195.306	251.067	57.0484	0	5135.35	6858.37	0.000409817	0	0.0105324	0.0109422	238.601	411.38	0	36	47	83	6	5
	25	Herschel Island S	Mr	active	54.78	NO	2.08	11.49	1087.72	2.31	4.18	1.87	2034.04	0.6267	1274.73	681.674	593.056	0.139205	0	0.487576	0.626781	1.0231	0	26.2939	27.317	0.0683122	0	1.75564	1.82395	177.448	0	621.528	798.977	181.547	0	16342.4	21825.6	0.00130417	0	0.0335176	0.0348218	759.306	406.046	353.26	36	47	83	6	5
	26	Herschel Island N	Mr	active	21	YES	32.82	17.93	12380.1	32.83	37.55	4.72	58434.2	0.502	29334	6214.83	23119.1	0.0178646	0.068358	0.415667	0.50189	0.131298	0.0690805	22.416	22.6164	0.0921362	0.0484763	15.7301	15.8707	524.039	2005.21	12193.2	14722.4	68.8051	138.521	273322	332967	0.00385148	0.00202641	0.65755	0.663427	29100.2	6165.3	22934.9	30	545	575	60	59
	30	Herschel Island N	Mr	active	12.48	YES	30.63	15.08	5722.81	30.61	32.2	1.58	9042.04	0.502	4539.1	2872.85	1666.25	0.0178646	0.068358	0.415667	0.50189	0.131298	0.0690805	22.416	22.6164	0.0921362	0.0484763	15.7301	15.8707	81.0892	310.284	1886.76	2278.13	10.6468	21.4346	42293.5	51523	0.000595973	0.000313564	0.101748	0.102658	4502.94	2849.96	1652.98	30	545	575	60	59
	34	Herschel Island N	Mr	active	0	YES	29.86	21.09	1000.83	29.87	29.92	0.05	50.0415	0.502	25.1208	502.417	0	0.0178646	0.068358	0.415667	0.50189	0.131298	0.0690805	22.416	22.6164	0.0921362	0.0484763	15.7301	15.8707	0.448773	1.71721	10.4419	12.6079	0.0589228	0.118626	234.065	285.144	3.2983e-06	1.73536e-06	0.000563108	0.000568142	24.9207	498.413	0	30	545	575	60	59
	35	Herschel Island N	Mr	active	13.76	NO	17.82	20.84	1753.93	17.72	17.79	0.07	122.775	0.502	61.6331	880.473	0	0.0178646	0.068358	0.415667	0.50189	0.131298	0.0690805	22.416	22.6164	0.0921362	0.0484763	15.7301	15.8707	1.10105	4.21312	25.6189	30.933	0.144565	0.291044	574.272	699.592	8.09227e-06	4.25765e-06	0.00138157	0.00139392	61.142	873.457	0	30	545	575	60	59
	39	Herschel Island W	Mr	active	390.8	NO	26.77	17.91	48265.3	26.76	28.57	1.81	87360.3	0.5133	44842	24774.6	20067.4	0.0191406	0.0825	0.411639	0.51328	0.140676	0.083372	22.1987	22.4228	0.0355134	0.0210471	5.60403	5.66059	858.304	3699.47	18458.7	23016.5	120.743	308.432	409761	516094	0.00630819	0.00373857	0.995437	1.00548	42518.2	23490.7	19027.5	55	864	919	56	55
	40	Herschel Island W	Mr	active	366.24	NO	28.25	13.81	82463.3	28.25	33.58	5.32	438705	0.5133	225187	42328.4	182859	0.0191406	0.0825	0.411639	0.51328	0.140676	0.083372	22.1987	22.4228	0.0355134	0.0210471	5.60403	5.66059	4310.22	18577.9	92695.9	115584	606.345	1548.88	2.05773e+06	2.59172e+06	0.0316784	0.0187743	4.99887	5.04933	213518	40134.9	173383	55	864	919	56	55
	41	Herschel Island W	Mr	active	458.59	NO	15.66	15.72	83639.4	15.64	24.54	8.9	744390	0.5133	382096	42932.1	339164	0.0191406	0.0825	0.411639	0.51328	0.140676	0.083372	22.1987	22.4228	0.0355134	0.0210471	5.60403	5.66059	7313.55	31522.9	157285	196122	1028.84	2628.13	3.49154e+06	4.3976e+06	0.0537517	0.0318561	8.48204	8.56765	362295	40707.3	321588	55	864	919	56	55
	44	Herschel Island W	Mr	active	20.52	NO	14.11	12.05	56709.9	14.1	17.83	3.74	212095	0.5133	108868	29109.2	79759.3	0.0191406	0.0825	0.411639	0.51328	0.140676	0.083372	22.1987	22.4228	0.0355134	0.0210471	5.60403	5.66059	2083.81	8981.65	44814.5	55880	293.142	748.818	994826	1.25298e+06	0.0153152	0.00907659	2.41674	2.44113	103227	27600.7	75626	55	864	919	56	55
	46	Herschel Island W	Mr	active	66.97	NO	11.4	13.39	16965.6	11.38	17.11	5.72	97043.4	0.5133	49812.4	8708.46	41103.9	0.0191406	0.0825	0.411639	0.51328	0.140676	0.083372	22.1987	22.4228	0.0355134	0.0210471	5.60403	5.66059	953.44	4109.52	20504.7	25567.7	134.126	342.619	455179	573299	0.0070074	0.00415296	1.10577	1.11693	47231	8257.17	38973.9	55	864	919	56	55
	52	Herschel Island S	Mr	active	93.92	YES	4.65	6.93	747.46	4.66	6.51	1.86	1390.28	0.6267	871.286	468.433	402.853	0.139205	0	0.487576	0.626781	1.0231	0	26.2939	27.317	0.0683122	0	1.75564	1.82395	121.287	0	424.818	546.105	124.088	0	11170.1	14917.9	0.00089141	0	0.0229095	0.0238009	518.99	279.027	239.963	36	47	83	6	5
	53	Roland Bay W	Mm	active	716.65	NO	9.63	9.41	66406.2	9.78	10.85	1.07	71054.6	0.515	36593.1	34199.2	2393.94	0.0529605	0.0707602	0.391401	0.515122	0.389239	0.0715082	21.1074	21.5681	0.00928457	0.00170569	0.503477	0.514467	1937.99	2589.34	14322.6	18849.9	754.341	185.159	302313	406558	0.0142435	0.00261671	0.772385	0.789245	34461.5	32207	2254.49	55	347	402	19	18
	58	Roland Bay E	L	active	50.37	NO	5.53	19.5	1147.69	5.45	7.05	1.59	1824.83	0.5378	981.392	617.228	364.164	0.0254115	0	0.512565	0.537976	0.186764	0	27.6414	27.8282	0.00622884	0	0.92188	0.928109	24.9386	0	503.027	527.966	4.65763	0	13904.4	14692.3	0.000183289	0	0.0271271	0.0273104	843.435	530.462	312.973	24	346	370	15	14
	72	Kay Point SE	Mr	active	19.15	YES	29.06	18.86	5197.42	29.05	31.72	2.67	13877.1	0.3822	5303.83	1986.45	3317.38	0.0335417	0.0533333	0.295459	0.382334	0.246518	0.0538971	15.9334	16.2338	0.0304409	0.00665541	1.96752	2.00461	177.899	282.871	1567.07	2027.84	43.8554	15.2459	24968.7	32919.6	0.00130749	0.000285861	0.0845082	0.0861016	8573.28	3210.97	5362.31	29	414	443	30	29
	73	Kay Point SE	Mr	active	0	NO	34.24	10.39	9303.16	33.79	38.52	4.73	44003.9	0.3822	16818.3	3555.67	13262.6	0.0335417	0.0533333	0.295459	0.382334	0.246518	0.0538971	15.9334	16.2338	0.0304409	0.00665541	1.96752	2.00461	564.114	896.976	4969.12	6430.21	139.064	48.3444	79175.1	104387	0.00414601	0.000906457	0.267973	0.273026	27185.6	5747.49	21438.1	29	414	443	30	29
	74	Kay Point SE	Mr	active	6.07	NO	22.1	17.72	1380.29	22.03	23.77	1.74	2401.7	0.3822	917.931	527.547	390.385	0.0335417	0.0533333	0.295459	0.382334	0.246518	0.0538971	15.9334	16.2338	0.0304409	0.00665541	1.96752	2.00461	30.789	48.9563	271.211	350.956	7.59003	2.6386	4321.32	5697.37	0.000226286	4.94738e-05	0.0146258	0.0149016	1483.77	852.743	631.03	29	414	443	30	29
	75	Kay Point SE	Mr	active	12.59	NO	15.23	25.96	881.35	15.22	16.69	1.47	1295.58	0.3822	495.172	336.852	158.32	0.0335417	0.0533333	0.295459	0.382334	0.246518	0.0538971	15.9334	16.2338	0.0304409	0.00665541	1.96752	2.00461	16.6089	26.4092	146.303	189.321	4.09439	1.42338	2331.11	3073.41	0.000122069	2.66883e-05	0.00788979	0.00803855	800.412	544.498	255.914	29	414	443	30	29
	79	Kay Point SE	Mr	active	543.28	NO	24.78	9.81	2719.57	24.78	25.43	0.65	1767.72	0.3822	675.623	1039.42	0	0.0335417	0.0533333	0.295459	0.382334	0.246518	0.0538971	15.9334	16.2338	0.0304409	0.00665541	1.96752	2.00461	22.6615	36.0332	199.619	258.314	5.58647	1.94208	3180.61	4193.42	0.000166553	3.64141e-05	0.010765	0.010968	1092.1	1680.15	0	29	414	443	30	29
	81	Kay Point SE	Mr	active	11.91	YES	2.95	14.77	297.71	2.95	3.32	0.37	110.153	0.3822	42.1004	113.785	0	0.0335417	0.0533333	0.295459	0.382334	0.246518	0.0538971	15.9334	16.2338	0.0304409	0.00665541	1.96752	2.00461	1.41212	2.24535	12.4389	16.0964	0.348112	0.121018	198.195	261.306	1.03785e-05	2.26909e-06	0.000670803	0.00068345	68.0523	183.925	0	29	414	443	30	29
	82	Kay Point SE	Mr	active	11.91	NO	3.96	17.57	522.72	2.95	3.32	0.37	193.406	0.3822	73.9199	199.784	0	0.0335417	0.0533333	0.295459	0.382334	0.246518	0.0538971	15.9334	16.2338	0.0304409	0.00665541	1.96752	2.00461	2.4794	3.9424	21.8403	28.2621	0.611216	0.212484	347.991	458.802	1.82226e-05	3.98407e-06	0.0011778	0.0012	119.486	322.936	0	29	414	443	30	29
	87	Kay Point SE	Mr	active	23.6	YES	4.75	5.27	562.84	4.76	6.19	1.43	804.861	0.3822	307.618	215.117	92.5005	0.0335417	0.0533333	0.295459	0.382334	0.246518	0.0538971	15.9334	16.2338	0.0304409	0.00665541	1.96752	2.00461	10.318	16.4063	90.8885	117.613	2.54358	0.884251	1448.17	1909.31	7.58333e-05	1.65797e-05	0.00490141	0.00499382	497.243	347.723	149.521	29	414	443	30	29
	89	Kay Point SE	Mr	active	0	NO	18.48	14.74	361.86	18.37	19.51	1.14	412.52	0.3822	157.665	138.303	19.3624	0.0335417	0.0533333	0.295459	0.382334	0.246518	0.0538971	15.9334	16.2338	0.0304409	0.00665541	1.96752	2.00461	5.28836	8.40882	46.5836	60.2808	1.30367	0.453211	742.237	978.589	3.88673e-05	8.4977e-06	0.00251215	0.00255951	254.855	223.557	31.298	29	414	443	30	29
	94	Kay Point SE	Mr	active	27.41	YES	33.35	12.16	10411.6	33.48	33.5	0.02	208.233	0.3822	79.5865	3979.32	0	0.0335417	0.0533333	0.295459	0.382334	0.246518	0.0538971	15.9334	16.2338	0.0304409	0.00665541	1.96752	2.00461	2.66946	4.24461	23.5146	30.4286	0.65807	0.228772	374.667	493.973	1.96195e-05	4.28948e-06	0.00126809	0.00129199	128.646	6432.31	0	29	414	443	30	29
	95	Kay Point SE	Mr	active	27.41	YES	13.19	21.96	977.54	33.48	33.5	0.02	19.5508	0.3822	7.47232	373.616	0	0.0335417	0.0533333	0.295459	0.382334	0.246518	0.0538971	15.9334	16.2338	0.0304409	0.00665541	1.96752	2.00461	0.250634	0.398524	2.20776	2.85692	0.0617857	0.0214792	35.1772	46.3788	1.84206e-06	4.02736e-07	0.00011906	0.000121304	12.0785	603.924	0	29	414	443	30	29
	96	Phillips Bay	L	active	64.23	NO	5.85	7.02	3083.33	5.99	8.13	2.15	6629.16	0.4718	3127.64	1454.72	1672.92	0.0586418	0	0.413296	0.471938	0.430994	0	22.2881	22.7191	0.0141055	0	0.729442	0.743547	183.41	0	1292.64	1476.05	79.0488	0	28810.5	33534.6	0.00134799	0	0.0697091	0.0710571	3501.52	1628.61	1872.91	47	96	143	7	6
	99	Phillips Bay NW	Mm	active	56.72	NO	6.59	10.37	3010.74	6.61	8.21	1.6	4817.18	0.6182	2977.98	1861.24	1116.74	0.0838542	0.168761	0.365384	0.617999	0.616295	0.170544	19.7043	20.4911	0.00492934	0.00136407	0.157602	0.163895	249.716	502.566	1088.11	1840.39	153.899	85.7099	21440.4	37711.7	0.00183531	0.000507879	0.0586791	0.0610223	1839.2	1149.5	689.7	28	176	204	12	11
	100	Kay Point SE	Mr	active	26.1	YES	6.45	14.75	605.83	6.59	6.81	0.22	133.283	0.3822	50.9406	231.548	0	0.0335417	0.0533333	0.295459	0.382334	0.246518	0.0538971	15.9334	16.2338	0.0304409	0.00665541	1.96752	2.00461	1.70863	2.71683	15.0509	19.4763	0.421208	0.146429	239.812	316.176	1.25578e-05	2.74555e-06	0.000811658	0.000826962	82.342	374.282	0	29	414	443	30	29
	103	Kay Point SE	Mr	active	20.48	YES	27.29	16.28	11408.1	27.3	28.51	1.2	13689.8	0.3822	5232.22	4360.19	872.037	0.0335417	0.0533333	0.295459	0.382334	0.246518	0.0538971	15.9334	16.2338	0.0304409	0.00665541	1.96752	2.00461	175.498	279.052	1545.91	2000.46	43.2633	15.0401	24631.6	32475.1	0.00128984	0.000282002	0.0833673	0.0849391	8457.53	7047.94	1409.59	29	414	443	30	29
	104	Kay Point SE	Mr	active	52.43	YES	32.02	17.89	8376.92	31.92	34.24	2.31	19350.7	0.3822	7395.83	3201.66	4194.17	0.0335417	0.0533333	0.295459	0.382334	0.246518	0.0538971	15.9334	16.2338	0.0304409	0.00665541	1.96752	2.00461	248.069	394.444	2185.17	2827.68	61.1533	21.2594	34817.2	45904.1	0.0018232	0.000398614	0.117841	0.120063	11954.9	5175.26	6779.59	29	414	443	30	29
	105	Kay Point SE	Mr	active	1.59	NO	30.52	24.94	1041.59	30.61	31.26	0.65	677.034	0.3822	258.762	398.096	0	0.0335417	0.0533333	0.295459	0.382334	0.246518	0.0538971	15.9334	16.2338	0.0304409	0.00665541	1.96752	2.00461	8.67932	13.8007	76.4536	98.9336	2.13961	0.743815	1218.17	1606.07	6.37895e-05	1.39465e-05	0.00412297	0.0042007	418.271	643.494	0	29	414	443	30	29
	106	King Point NW	Mm	active	9.81	NO	17.26	8.7	8265.48	17.28	18.78	1.5	12398.2	0.4753	5892.87	3928.58	1964.29	0.0251563	0.1	0.350291	0.475448	0.184888	0.101057	18.8904	19.1764	0.00705739	0.00385746	0.721068	0.731983	148.243	589.287	2064.22	2801.75	27.4083	59.5516	38994	53727.4	0.00108952	0.000595516	0.111319	0.113004	6505.35	4336.9	2168.45	40	576	616	40	39
	108	King Point NW	Mm	active	122.11	NO	5.71	8.37	9349.67	5.76	14.99	9.23	86297.5	0.4753	41017.2	4443.9	36573.3	0.0251563	0.1	0.350291	0.475448	0.184888	0.101057	18.8904	19.1764	0.00705739	0.00385746	0.721068	0.731983	1031.84	4101.72	14368	19501.5	190.775	414.507	271417	373968	0.0075836	0.00414507	0.774831	0.78656	45280.3	4905.77	40374.5	40	576	616	40	39
	110	King Point SE	L	active	104.66	NO	3.02	3.65	5630.3	3.03	11.23	8.21	46224.8	0.7358	34012.2	4142.77	29869.4	0.111806	0.35625	0.267819	0.735875	0.821726	0.360016	14.4429	15.6246	0.0438504	0.0192118	0.770727	0.833789	3802.75	12116.8	9109.12	25028.7	3124.82	4362.25	131562	391064	0.0279487	0.0122449	0.491234	0.531427	12212.6	1487.53	10725.1	31	85	116	12	11
	112	King Point SE	L	active	67.2	NO	2.77	7.61	1761.57	2.81	15.95	13.14	23147	0.7358	17031.6	1296.16	15735.4	0.111806	0.35625	0.267819	0.735875	0.821726	0.360016	14.4429	15.6246	0.0438504	0.0192118	0.770727	0.833789	1904.23	6067.5	4561.39	12533.1	1564.75	2184.4	65879.6	195825	0.0139953	0.00613164	0.245985	0.266112	6115.45	465.407	5650.04	31	85	116	12	11
	113	King Point SE	L	active	1109.25	NO	1.11	3.96	335.36	1.12	9.88	8.76	2937.75	0.7358	2161.6	246.758	1914.84	0.111806	0.35625	0.267819	0.735875	0.821726	0.360016	14.4429	15.6246	0.0438504	0.0192118	0.770727	0.833789	241.679	770.07	578.918	1590.67	198.594	277.237	8361.24	24853.6	0.00177624	0.000778209	0.0312197	0.0337742	776.155	88.6021	687.552	31	85	116	12	11
	114	King Point SE	L	active	24.2	NO	1.19	5.06	343.2	1.23	8.15	6.92	2374.94	0.7358	1747.48	252.527	1494.96	0.111806	0.35625	0.267819	0.735875	0.821726	0.360016	14.4429	15.6246	0.0438504	0.0192118	0.770727	0.833789	195.378	622.541	468.01	1285.93	160.548	224.124	6759.41	20092.2	0.00143595	0.000629121	0.0252387	0.0273038	627.46	90.6734	536.787	31	85	116	12	11
	115	King Point SE	L	active	36.01	NO	2.95	7.47	1983.19	2.94	5.06	2.12	4204.36	0.7358	3093.57	1459.23	1634.34	0.111806	0.35625	0.267819	0.735875	0.821726	0.360016	14.4429	15.6246	0.0438504	0.0192118	0.770727	0.833789	345.878	1102.08	828.518	2276.48	284.217	396.768	11966.2	35569.2	0.00254207	0.00111373	0.0446801	0.0483359	1110.79	523.959	586.834	31	85	116	12	11
	117	King Point SE	L	active	58.63	YES	10.18	21.23	2922.1	10.29	12.03	1.74	5084.45	0.7358	3741.14	2150.08	1591.06	0.111806	0.35625	0.267819	0.735875	0.821726	0.360016	14.4429	15.6246	0.0438504	0.0192118	0.770727	0.833789	418.28	1332.78	1001.95	2753.01	343.712	479.822	14471	43014.8	0.00307419	0.00134687	0.0540329	0.0584539	1343.31	772.019	571.294	31	85	116	12	11
	119	Sabine Point	Mm	active	32.3	NO	9.34	23.93	863.76	10.96	12.23	1.27	1096.98	0.5965	654.346	515.233	139.113	0.0136719	0.16975	0.413407	0.596829	0.100483	0.171544	22.2941	22.5661	0.0085606	0.0146147	1.89934	1.92251	8.94613	111.075	270.511	390.532	0.898933	19.0543	6030.8	8812.8	6.57505e-05	0.000112249	0.014588	0.014766	442.629	348.527	94.1023	59	805	864	40	39
	124	Shingle Point W	Mm	active	137.28	NO	21.3	10.81	19101.6	21.28	21.5	0.22	4202.36	0.462	1941.49	8824.95	0	0.0387019	0.108814	0.314636	0.462152	0.284444	0.109964	16.9676	17.362	0.0191616	0.00740778	1.14303	1.1696	75.1393	211.261	610.862	897.262	21.3729	23.2312	10364.8	15578.3	0.000552244	0.000213494	0.0329424	0.0337081	2260.87	10276.7	0	35	268	303	26	25
	127	Shingle Point W	Mm	active	44.06	NO	21.51	24.11	4318.77	23.03	23.15	0.12	518.252	0.462	239.433	1995.27	0	0.0387019	0.108814	0.314636	0.462152	0.284444	0.109964	16.9676	17.362	0.0191616	0.00740778	1.14303	1.1696	9.2665	26.0536	75.3341	110.654	2.6358	2.86497	1278.24	1921.18	6.81051e-05	2.6329e-05	0.00406259	0.00415703	278.82	2323.5	0	35	268	303	26	25
	128	Shingle Point W	Mm	active	9.44	NO	10.95	14.56	484.56	10.88	11.47	0.59	285.89	0.462	132.081	223.867	0	0.0387019	0.108814	0.314636	0.462152	0.284444	0.109964	16.9676	17.362	0.0191616	0.00740778	1.14303	1.1696	5.1118	14.3723	41.5575	61.0416	1.45402	1.58044	705.13	1059.8	3.75697e-05	1.45242e-05	0.0022411	0.00229319	153.809	260.693	0	35	268	303	26	25
	131	Shingle Point W	Mm	active	20.57	NO	14.03	7	1101.15	15.02	17.02	2.01	2213.31	0.462	1022.55	508.731	513.819	0.0387019	0.108814	0.314636	0.462152	0.284444	0.109964	16.9676	17.362	0.0191616	0.00740778	1.14303	1.1696	39.5746	111.268	321.731	472.573	11.2568	12.2355	5458.99	8204.81	0.000290858	0.000112444	0.0173502	0.0177535	1190.76	592.419	598.343	35	268	303	26	25
	133	Shingle Point W	Mm	active	6.17	NO	15.4	18.09	623.52	15.41	17.13	1.72	1072.45	0.462	495.474	288.066	207.408	0.0387019	0.108814	0.314636	0.462152	0.284444	0.109964	16.9676	17.362	0.0191616	0.00740778	1.14303	1.1696	19.1758	53.9146	155.894	228.984	5.45443	5.92867	2645.14	3975.62	0.000140934	5.44844e-05	0.00840699	0.00860241	576.98	335.454	241.527	35	268	303	26	25
	135	Shingle Point W	Mm	active	53.39	NO	11.91	26.3	1926.63	14.1	14.58	0.49	944.049	0.462	436.15	890.103	0	0.0387019	0.108814	0.314636	0.462152	0.284444	0.109964	16.9676	17.362	0.0191616	0.00740778	1.14303	1.1696	16.8799	47.4593	137.229	201.568	4.80137	5.21883	2328.44	3499.62	0.00012406	4.7961e-05	0.00740042	0.00757244	507.898	1036.53	0	35	268	303	26	25
	137	Shingle Point W	Mm	active	13.71	NO	17.81	25.16	1396.16	18.09	18.89	0.8	1116.93	0.462	516.021	645.026	0	0.0387019	0.108814	0.314636	0.462152	0.284444	0.109964	16.9676	17.362	0.0191616	0.00740778	1.14303	1.1696	19.971	56.1503	162.359	238.48	5.68062	6.17453	2754.83	4140.48	0.000146779	5.67438e-05	0.00875562	0.00895914	600.907	751.134	0	35	268	303	26	25
	151	Shingle Point W	Mm	active	18.43	NO	7.22	21.97	413.29	7.55	9.22	1.67	690.194	0.462	318.87	190.94	127.93	0.0387019	0.108814	0.314636	0.462152	0.284444	0.109964	16.9676	17.362	0.0191616	0.00740778	1.14303	1.1696	12.3409	34.6975	100.328	147.366	3.51028	3.81549	1702.32	2558.57	9.07005e-05	3.50643e-05	0.00541045	0.00553621	371.325	222.35	148.975	35	268	303	26	25
	154	Shingle Point W	Mm	active	25	NO	18.37	24.82	1456.78	19.34	21.13	1.79	2607.64	0.462	1204.73	673.032	531.696	0.0387019	0.108814	0.314636	0.462152	0.284444	0.109964	16.9676	17.362	0.0191616	0.00740778	1.14303	1.1696	46.6253	131.091	379.05	556.767	13.2623	14.4154	6431.57	9666.58	0.000342677	0.000132477	0.0204413	0.0209165	1402.91	783.748	619.161	35	268	303	26	25
	155	Shingle Point W	Mm	active	28.33	NO	18.73	25.86	1734.95	18.87	20.32	1.45	2515.68	0.462	1162.24	801.547	360.696	0.0387019	0.108814	0.314636	0.462152	0.284444	0.109964	16.9676	17.362	0.0191616	0.00740778	1.14303	1.1696	44.981	126.468	365.683	537.133	12.7946	13.907	6204.76	9325.69	0.000330593	0.000127805	0.0197204	0.0201788	1353.43	933.403	420.031	35	268	303	26	25
	158	Shingle Point W	Mm	active	28.71	NO	12.28	17.4	2912.11	12.53	13.77	1.23	3581.9	0.462	1654.84	1345.39	309.441	0.0387019	0.108814	0.314636	0.462152	0.284444	0.109964	16.9676	17.362	0.0191616	0.00740778	1.14303	1.1696	64.0453	180.069	520.67	764.785	18.2173	19.8012	8834.52	13278.2	0.000470707	0.000181973	0.0280786	0.0287312	1927.06	1566.72	360.344	35	268	303	26	25
	159	Shingle Point W	Mm	active	19.44	YES	15.32	26.07	1148.36	15.23	17.2	1.97	2262.27	0.462	1045.17	530.542	514.626	0.0387019	0.108814	0.314636	0.462152	0.284444	0.109964	16.9676	17.362	0.0191616	0.00740778	1.14303	1.1696	40.45	113.729	328.847	483.026	11.5058	12.5061	5579.74	8386.3	0.000297292	0.000114931	0.017734	0.0181462	1217.1	617.818	599.283	35	268	303	26	25
	160	Shingle Point W	Mm	active	81.16	YES	8.3	19.33	2369.41	8.39	8.78	0.4	947.764	0.462	437.867	1094.67	0	0.0387019	0.108814	0.314636	0.462152	0.284444	0.109964	16.9676	17.362	0.0191616	0.00740778	1.14303	1.1696	16.9463	47.6461	137.769	202.361	4.82027	5.23937	2337.6	3513.39	0.000124548	4.81497e-05	0.00742954	0.00760224	509.897	1274.74	0	35	268	303	26	25
	164	Shingle Point W	Mm	active	258.72	NO	2.17	29.08	208.07	2.15	15.21	13.05	2715.31	0.462	1254.47	96.1283	1158.35	0.0387019	0.108814	0.314636	0.462152	0.284444	0.109964	16.9676	17.362	0.0191616	0.00740778	1.14303	1.1696	48.5506	136.505	394.703	579.758	13.8099	15.0106	6697.15	10065.7	0.000356827	0.000137947	0.0212854	0.0217802	1460.84	111.942	1348.9	35	268	303	26	25
	165	Sabine Point W	L	active	0	YES	18.2	20.01	459.17	18.16	21.61	3.45	1584.14	0.3038	481.261	139.496	341.765	0.014875	0	0.28889	0.303765	0.109325	0	15.5792	15.6885	0.00364168	0	0.518949	0.522591	7.15875	0	139.031	146.19	0.782633	0	2165.99	2293.5	5.2614e-05	0	0.00749764	0.00755026	1102.88	319.674	783.202	46	541	587	25	24
	167	Phillips Bay	L	active	0	YES	6.48	8.39	1833.1	6.44	7.47	1.03	1888.09	0.4718	890.802	864.857	25.9457	0.0586418	0	0.413296	0.471938	0.430994	0	22.2881	22.7191	0.0141055	0	0.729442	0.743547	52.2383	0	368.165	420.403	22.5144	0	8205.71	9551.19	0.00038393	0	0.0198543	0.0202382	997.291	968.243	29.0473	47	96	143	7	6
	169	Herschel Island N	Mr	active	10.64	YES	39.74	7.95	14897.1	39.79	40.01	0.22	3277.36	0.502	1645.24	7478.34	0	0.0178646	0.068358	0.415667	0.50189	0.131298	0.0690805	22.416	22.6164	0.0921362	0.0484763	15.7301	15.8707	29.3915	112.465	683.871	825.727	3.85903	7.76915	15329.6	18674.9	0.000216015	0.000113654	0.0368796	0.0372092	1632.13	7418.76	0	30	545	575	60	59
	172	Herschel Island W	Mr	active	297.59	NO	14.75	23.75	19619.3	14.71	21.82	7.11	139494	0.5133	71602.1	10070.6	61531.4	0.0191406	0.0825	0.411639	0.51328	0.140676	0.083372	22.1987	22.4228	0.0355134	0.0210471	5.60403	5.66059	1370.51	5907.17	29474.2	36751.9	192.798	492.493	654290	824080	0.0100727	0.00596961	1.58948	1.60552	67891.5	9548.74	58342.8	55	864	919	56	55
	179	Herschel Island E	Mr	active	47.51	YES	7.72	24.37	1146.39	8.01	11.13	3.12	3576.74	0.5552	1985.8	636.476	1349.33	0.04375	0.236218	0.275366	0.555333	0.321545	0.238714	14.8498	15.4101	0.0673777	0.0500211	3.11169	3.22909	86.8789	469.082	546.822	1102.78	27.9355	111.977	8120.22	16994	0.000638525	0.00047404	0.0294889	0.0306014	1590.93	509.914	1081.02	34	273	307	25	24
	180	Herschel Island E	Mr	active	111.25	NO	11.21	21.17	3731.73	11.47	14.03	2.56	9553.23	0.5552	5303.95	2071.86	3232.1	0.04375	0.236218	0.275366	0.555333	0.321545	0.238714	14.8498	15.4101	0.0673777	0.0500211	3.11169	3.22909	232.048	1252.89	1460.53	2945.46	74.6139	299.082	21688.6	45389.9	0.00170546	0.00126613	0.0787628	0.0817344	4249.28	1659.87	2589.4	34	273	307	25	24
	182	Herschel Island N	Mr	active	13.76	NO	19.72	23.15	653.05	17.72	17.79	0.07	45.7135	0.502	22.9482	327.831	0	0.0178646	0.068358	0.415667	0.50189	0.131298	0.0690805	22.416	22.6164	0.0921362	0.0484763	15.7301	15.8707	0.40996	1.56869	9.5388	11.5175	0.0538267	0.108366	213.822	260.483	3.01304e-06	1.58527e-06	0.000514406	0.000519004	22.7653	325.219	0	30	545	575	60	59
	183	Herschel Island N	Mr	active	2.91	NO	23.32	28.97	2842.12	23.33	25.58	2.24	6366.35	0.502	3195.91	1426.74	1769.16	0.0178646	0.068358	0.415667	0.50189	0.131298	0.0690805	22.416	22.6164	0.0921362	0.0484763	15.7301	15.8707	57.0935	218.466	1328.43	1603.99	7.49624	15.0917	29778.1	36276.5	0.000419615	0.000220775	0.0716394	0.0722798	3170.44	1415.38	1755.07	30	545	575	60	59
	185	Shingle Point W	Mm	active	29.28	NO	3.51	21.25	563.69	3.48	12.26	8.78	4949.2	0.462	2286.53	260.425	2026.1	0.0387019	0.108814	0.314636	0.462152	0.284444	0.109964	16.9676	17.362	0.0191616	0.00740778	1.14303	1.1696	88.4931	248.807	719.424	1056.72	25.1713	27.3598	12206.9	18346.8	0.000650389	0.000251437	0.0387969	0.0396987	2662.67	303.265	2359.4	35	268	303	26	25
	186	Shingle Point W	Mm	active	20.39	NO	10.39	24.31	989.66	10.54	10.91	0.38	376.071	0.462	173.745	457.223	0	0.0387019	0.108814	0.314636	0.462152	0.284444	0.109964	16.9676	17.362	0.0191616	0.00740778	1.14303	1.1696	6.72425	18.9059	54.6663	80.2964	1.91267	2.07897	927.555	1394.11	4.94206e-05	1.91057e-05	0.00294803	0.00301655	202.326	532.437	0	35	268	303	26	25
	187	King Point SE	L	active	99.34	NO	3.05	7.92	2974.29	3.05	15.05	12	35691.5	0.7358	26261.8	2188.48	24073.3	0.111806	0.35625	0.267819	0.735875	0.821726	0.360016	14.4429	15.6246	0.0438504	0.0192118	0.770727	0.833789	2936.21	9355.76	7033.42	19325.4	2412.76	3368.22	101583	301952	0.02158	0.00945465	0.379296	0.410331	9429.69	785.807	8643.88	31	85	116	12	11
	188	King Point SE	L	active	99.34	NO	2.49	7.12	2368.48	3.05	15.05	12	28421.8	0.7358	20912.7	1742.73	19170	0.111806	0.35625	0.267819	0.735875	0.821726	0.360016	14.4429	15.6246	0.0438504	0.0192118	0.770727	0.833789	2338.16	7450.16	5600.83	15389.2	1921.33	2682.17	80892.2	240450	0.0171845	0.00752891	0.30204	0.326754	7509.03	625.752	6883.28	31	85	116	12	11
	192	Herschel Island W	Mr	active	5.64	NO	21.21	17.84	2307.85	21.17	22.31	1.14	2630.95	0.5133	1350.47	1184.62	165.847	0.0191406	0.0825	0.411639	0.51328	0.140676	0.083372	22.1987	22.4228	0.0355134	0.0210471	5.60403	5.66059	25.8488	111.413	555.905	693.167	3.6363	9.28877	12340.4	15542.7	0.000189978	0.000112591	0.0299786	0.0302812	1280.48	1123.23	157.252	55	864	919	56	55
	193	Herschel Island E	Mr	active	45.76	NO	21.33	12.15	9361.72	21.52	22.93	1.41	13200	0.5552	7328.65	5197.63	2131.03	0.04375	0.236218	0.275366	0.555333	0.321545	0.238714	14.8498	15.4101	0.0673777	0.0500211	3.11169	3.22909	320.629	1731.16	2018.06	4069.85	103.097	413.252	29967.9	62716.7	0.00235649	0.00174946	0.108829	0.112935	5871.37	4164.09	1707.28	34	273	307	25	24
	200	Herschel Island W	Mr	active	0	YES	17.21	21.56	838.36	17.21	18.82	1.61	1349.76	0.5133	692.832	430.33	262.501	0.0191406	0.0825	0.411639	0.51328	0.140676	0.083372	22.1987	22.4228	0.0355134	0.0210471	5.60403	5.66059	13.2612	57.1586	285.197	355.616	1.86554	4.76543	6331	7973.91	9.74647e-05	5.77628e-05	0.01538	0.0155352	656.928	408.03	248.898	55	864	919	56	55
	201	Herschel Island W	Mr	active	28.99	YES	14.28	28.1	2182.65	14.23	14.77	0.54	1178.63	0.5133	604.991	1120.35	0	0.0191406	0.0825	0.411639	0.51328	0.140676	0.083372	22.1987	22.4228	0.0355134	0.0210471	5.60403	5.66059	11.5799	49.9118	249.038	310.53	1.62901	4.16125	5528.33	6962.94	8.51077e-05	5.04393e-05	0.01343	0.0135656	573.64	1062.3	0	55	864	919	56	55
	202	Herschel Island N	Mr	active	0	YES	36.2	24.31	11037.1	36.18	38.66	2.48	27372	0.502	13740.7	5540.62	8200.12	0.0178646	0.068358	0.415667	0.50189	0.131298	0.0690805	22.416	22.6164	0.0921362	0.0484763	15.7301	15.8707	245.473	939.29	5711.58	6896.34	32.23	64.8867	128031	155970	0.00180413	0.000949218	0.308012	0.310766	13631.3	5496.48	8134.78	30	545	575	60	59
	206	Herschel Island S	Mr	active	93.92	YES	2.75	8.51	455.58	2.75	4.62	1.87	851.935	0.6267	533.907	285.512	248.395	0.139205	0	0.487576	0.626781	1.0231	0	26.2939	27.317	0.0683122	0	1.75564	1.82395	74.3223	0	260.321	334.643	76.039	0	6844.83	9141.42	0.000546239	0	0.0140385	0.0145847	318.027	170.068	147.959	36	47	83	6	5
	207	Herschel Island E	Mr	active	22.79	NO	15.96	21.51	946.03	16.22	19.96	3.74	3538.15	0.5552	1964.38	525.236	1439.15	0.04375	0.236218	0.275366	0.555333	0.321545	0.238714	14.8498	15.4101	0.0673777	0.0500211	3.11169	3.22909	85.9417	464.022	540.924	1090.89	27.6341	110.769	8032.63	16810.7	0.000631637	0.000468926	0.0291708	0.0302713	1573.77	420.794	1152.98	34	273	307	25	24
	208	Herschel Island E	Mr	active	14.01	NO	23.77	12.7	4014.94	23.83	27.22	3.39	13610.6	0.5552	7556.63	2229.09	5327.54	0.04375	0.236218	0.275366	0.555333	0.321545	0.238714	14.8498	15.4101	0.0673777	0.0500211	3.11169	3.22909	330.603	1785.01	2080.84	4196.45	106.304	426.108	30900.1	64667.7	0.0024298	0.00180388	0.112215	0.116448	6054.02	1785.85	4268.17	34	273	307	25	24
	213	King Point NW	Mm	active	10.98	NO	38.74	13.71	26149.5	38.73	42.82	4.08	106690	0.4753	50709.7	12428.8	38280.9	0.0251563	0.1	0.350291	0.475448	0.184888	0.101057	18.8904	19.1764	0.00705739	0.00385746	0.721068	0.731983	1275.67	5070.97	17763.2	24109.8	235.856	512.457	335554	462338	0.00937563	0.00512457	0.957927	0.972427	55980.2	13720.6	42259.5	40	576	616	40	39
	215	Stokes Point SE	L	active	0	NO	8.27	15.28	1336.49	8.24	8.28	0.04	53.4596	0.5559	29.7182	742.955	0	0.0762344	0	0.479706	0.55594	0.560292	0	25.8694	26.4297	-0.00768228	0	-0.354701	-0.362383	2.26555	0	14.256	16.5215	1.26937	0	368.795	436.66	1.66509e-05	0	0.000768793	0.000785444	23.7414	593.535	0	42	137	179	10	9
	219	Roland Bay W	Mm	active	47.31	NO	5.07	8.13	1609.21	5.1	6.3	1.2	1931.05	0.515	994.492	828.743	165.749	0.0529605	0.0707602	0.391401	0.515122	0.389239	0.0715082	21.1074	21.5681	0.00928457	0.00170569	0.503477	0.514467	52.6688	70.3705	389.245	512.285	20.5007	5.03206	8215.95	11049	0.000387095	7.11143e-05	0.0209911	0.0214493	936.56	780.467	156.093	55	347	402	19	18
	222	Herschel Island E	Mr	active	1.59	NO	41.96	9.54	75153.2	41.95	47.8	5.85	439646	0.5552	244091	41725	202366	0.04375	0.236218	0.275366	0.555333	0.321545	0.238714	14.8498	15.4101	0.0673777	0.0500211	3.11169	3.22909	10679	57658.7	67214.4	135552	3433.78	13764	998123	2.08887e+06	0.0784864	0.0582682	3.62472	3.76147	195555	33428.1	162126	34	273	307	25	24
	223	Herschel Island S	Mr	active	21.42	YES	6.39	15.9	1202.64	6.42	6.82	0.4	481.056	0.6267	301.478	753.694	0	0.139205	0	0.487576	0.626781	1.0231	0	26.2939	27.317	0.0683122	0	1.75564	1.82395	41.9671	0	146.993	188.96	42.9364	0	3865.02	5161.82	0.000308441	0	0.00792701	0.00823545	179.578	448.946	0	36	47	83	6	5
	226	Phillips Bay NW	Mm	active	161.51	NO	10.85	8.85	16635.2	11.49	12.74	1.25	20794	0.6182	12854.9	10283.9	2570.97	0.0838542	0.168761	0.365384	0.617999	0.616295	0.170544	19.7043	20.4911	0.00492934	0.00136407	0.157602	0.163895	1077.93	2169.4	4696.96	7944.3	664.325	369.979	92550.4	162788	0.00792239	0.00219233	0.253296	0.263411	7939.16	6351.33	1587.83	28	176	204	12	11
	229	Kay Point SE	Mr	active	31.1	NO	7.2	24.12	993.03	7.2	10.11	2.91	2889.72	0.3822	1104.45	379.536	724.914	0.0335417	0.0533333	0.295459	0.382334	0.246518	0.0538971	15.9334	16.2338	0.0304409	0.00665541	1.96752	2.00461	37.0451	58.904	326.32	422.269	9.13228	3.17475	5199.39	6855.04	0.000272267	5.95266e-05	0.0175977	0.0179295	1785.27	613.494	1171.77	29	414	443	30	29
	233	Herschel Island S	Mr	active	103.83	NO	5.63	9.37	4453.8	5.63	5.93	0.29	1291.6	0.6267	809.447	2791.2	0	0.139205	0	0.487576	0.626781	1.0231	0	26.2939	27.317	0.0683122	0	1.75564	1.82395	112.679	0	394.667	507.346	115.281	0	10377.3	13859.1	0.000828143	0	0.0212835	0.0221116	482.155	1662.6	0	36	47	83	6	5
	234	Herschel Island S	Mr	active	110.51	NO	5.5	10	3570.21	5.63	5.93	0.29	1035.36	0.6267	648.861	2237.45	0	0.139205	0	0.487576	0.626781	1.0231	0	26.2939	27.317	0.0683122	0	1.75564	1.82395	90.3244	0	316.369	406.693	92.4106	0	8318.56	11109.6	0.000663848	0	0.017061	0.0177249	386.5	1332.76	0	36	47	83	6	5
	235	Herschel Island S	Mr	active	39.16	YES	0.48	11.09	431.94	0.54	2.1	1.56	673.826	0.6267	422.287	270.697	151.59	0.139205	0	0.487576	0.626781	1.0231	0	26.2939	27.317	0.0683122	0	1.75564	1.82395	58.7843	0	205.897	264.681	60.1421	0	5413.83	7230.29	0.000432041	0	0.0111036	0.0115356	251.539	161.243	90.2962	36	47	83	6	5
	236	Herschel Island S	Mr	active	14.15	YES	1.02	12.84	195.09	1.06	2.21	1.15	224.353	0.6267	140.602	122.263	18.3394	0.139205	0	0.487576	0.626781	1.0231	0	26.2939	27.317	0.0683122	0	1.75564	1.82395	19.5725	0	68.5543	88.1268	20.0246	0	1802.56	2407.36	0.00014385	0	0.00369698	0.00384083	83.7512	72.8271	10.9241	36	47	83	6	5
	238	Herschel Island E	Mr	stable	22.8	YES	15.42	19.65	1284.58	16.51	21.59	5.08	6525.67	0.5552	3623.05	713.199	2909.85	0.04375	0.236218	0.275366	0.555333	0.321545	0.238714	14.8498	15.4101	0.0673777	0.0500211	3.11169	3.22909	158.508	855.828	997.664	2012	50.9676	204.299	14815.1	31005.1	0.00116497	0.000864874	0.0538017	0.0558316	2902.62	571.381	2331.24	34	273	307	25	24
	239	Herschel Island N	Mr	stable	156.67	YES	5.25	12.14	6812.14	5.28	6.15	0.87	5926.56	0.502	2975.13	3419.69	0	0.0178646	0.068358	0.415667	0.50189	0.131298	0.0690805	22.416	22.6164	0.0921362	0.0484763	15.7301	15.8707	53.1495	203.374	1236.67	1493.19	6.9784	14.0492	27721.1	33770.5	0.000390628	0.000205524	0.0666905	0.0672867	2951.43	3392.45	0	30	545	575	60	59
	240	Herschel Island N	Mr	stable	21	YES	37.22	13.27	19310.5	32.83	37.55	4.72	91145.5	0.502	45755	9693.86	36061.2	0.0178646	0.068358	0.415667	0.50189	0.131298	0.0690805	22.416	22.6164	0.0921362	0.0484763	15.7301	15.8707	817.394	3127.72	19018.9	22964	107.322	216.065	426326	519361	0.00600752	0.00316078	1.02564	1.03481	45390.4	9616.62	35773.8	30	545	575	60	59
	242	Herschel Island N	Mr	stable	12.48	YES	31.87	16.4	8931.24	30.61	32.2	1.58	14111.4	0.502	7083.9	4483.48	2600.42	0.0178646	0.068358	0.415667	0.50189	0.131298	0.0690805	22.416	22.6164	0.0921362	0.0484763	15.7301	15.8707	126.551	484.241	2944.55	3555.34	16.6158	33.4517	66004.9	80408.8	0.000930099	0.00048936	0.158793	0.160212	7027.46	4447.76	2579.7	30	545	575	60	59
	243	Herschel Island N	Mr	stable	82.24	YES	23.3	27.86	6749.3	23.43	23.5	0.07	472.451	0.502	237.17	3388.15	0	0.0178646	0.068358	0.415667	0.50189	0.131298	0.0690805	22.416	22.6164	0.0921362	0.0484763	15.7301	15.8707	4.23695	16.2125	98.584	119.033	0.556301	1.11997	2209.86	2692.1	3.11399e-05	1.63839e-05	0.00531641	0.00536393	235.281	3361.15	0	30	545	575	60	59
	244	Herschel Island W	Mr	stable	66.97	NO	26.66	20.47	21958.1	11.38	17.11	5.72	125601	0.5133	64470.7	11271.1	53199.6	0.0191406	0.0825	0.411639	0.51328	0.140676	0.083372	22.1987	22.4228	0.0355134	0.0210471	5.60403	5.66059	1234.01	5318.84	26538.7	33091.5	173.596	443.442	589125	742004	0.00906948	0.00537506	1.43117	1.44561	61129.8	10687	50442.7	55	864	919	56	55
	249	Herschel Island S	Mr	stable	24.14	YES	0.79	12.86	2713.69	3.49	4.63	1.14	3093.61	0.6267	1938.76	1700.67	238.094	0.139205	0	0.487576	0.626781	1.0231	0	26.2939	27.317	0.0683122	0	1.75564	1.82395	269.885	0	945.295	1215.18	276.118	0	24855.4	33195	0.00198354	0	0.0509776	0.0529611	1154.84	1013.02	141.823	36	47	83	6	5
	250	Herschel Island S	Mr	stable	93.92	YES	6.27	9.35	4657.67	4.66	6.51	1.86	8663.27	0.6267	5429.27	2918.96	2510.31	0.139205	0	0.487576	0.626781	1.0231	0	26.2939	27.317	0.0683122	0	1.75564	1.82395	755.779	0	2647.18	3402.96	773.236	0	69604.6	92958.5	0.00555467	0	0.142756	0.148311	3234	1738.71	1495.29	36	47	83	6	5
	251	Herschel Island S	Mr	stable	26.87	NO	8.15	10.26	2259.64	8.16	8.64	0.48	1084.63	0.6267	679.736	1416.12	0	0.139205	0	0.487576	0.626781	1.0231	0	26.2939	27.317	0.0683122	0	1.75564	1.82395	94.6223	0	331.423	426.045	96.8079	0	8714.39	11638.3	0.000695436	0	0.0178729	0.0185683	404.891	843.524	0	36	47	83	6	5
	252	Herschel Island S	Mr	stable	40.01	NO	8.04	13.09	2519.68	8.07	9.68	1.6	4031.49	0.6267	2526.53	1579.08	947.45	0.139205	0	0.487576	0.626781	1.0231	0	26.2939	27.317	0.0683122	0	1.75564	1.82395	351.705	0	1231.88	1583.58	359.829	0	32390.8	43258.6	0.00258489	0	0.0664323	0.0690172	1504.95	940.597	564.358	36	47	83	6	5
	253	Herschel Island S	Mr	stable	56.93	NO	7.1	12.25	2703.19	7.13	9.86	2.73	7379.71	0.6267	4624.86	1694.09	2930.77	0.139205	0	0.487576	0.626781	1.0231	0	26.2939	27.317	0.0683122	0	1.75564	1.82395	643.802	0	2254.97	2898.78	658.672	0	59291.9	79185.7	0.00473169	0	0.121605	0.126337	2754.85	1009.1	1745.74	36	47	83	6	5
	255	Herschel Island S	Mr	stable	179.03	NO	4.95	13.18	6660.25	4.97	5.91	0.94	6260.63	0.6267	3923.54	4173.98	0	0.139205	0	0.487576	0.626781	1.0231	0	26.2939	27.317	0.0683122	0	1.75564	1.82395	546.175	0	1913.02	2459.2	558.79	0	50300.8	67177.8	0.00401416	0	0.103165	0.107179	2337.1	2486.27	0	36	47	83	6	5
	256	Herschel Island S	Mr	stable	12.85	NO	6.46	5.46	5985.95	6.91	7.5	0.59	3531.71	0.6267	2213.32	3751.39	0	0.139205	0	0.487576	0.626781	1.0231	0	26.2939	27.317	0.0683122	0	1.75564	1.82395	308.105	0	1079.16	1387.27	315.221	0	28375.4	37895.9	0.00226445	0	0.0581968	0.0604612	1318.39	2234.56	0	36	47	83	6	5
	257	Herschel Island S	Mr	stable	72.05	NO	6.87	8.94	11825.3	6.89	8.32	1.42	16791.9	0.6267	10523.5	7410.89	3112.57	0.139205	0	0.487576	0.626781	1.0231	0	26.2939	27.317	0.0683122	0	1.75564	1.82395	1464.91	0	5130.99	6595.9	1498.75	0	134914	180180	0.0107665	0	0.276702	0.287469	6268.4	4414.37	1854.04	36	47	83	6	5
	258	Herschel Island S	Mr	stable	35.45	NO	7.27	13.85	8690.08	6.46	9.13	2.67	23202.5	0.6267	14541	5446.07	9094.94	0.139205	0	0.487576	0.626781	1.0231	0	26.2939	27.317	0.0683122	0	1.75564	1.82395	2024.18	0	7089.85	9114.03	2070.93	0	186420	248967	0.0148769	0	0.382339	0.397216	8661.5	3244.01	5417.49	36	47	83	6	5
	259	Herschel Island N	Mr	stable	0	YES	37.61	20.93	699.82	37.56	37.64	0.07	48.9874	0.502	24.5917	351.31	0	0.0178646	0.068358	0.415667	0.50189	0.131298	0.0690805	22.416	22.6164	0.0921362	0.0484763	15.7301	15.8707	0.43932	1.68104	10.222	12.3423	0.0576816	0.116127	229.135	279.138	3.22883e-06	1.69881e-06	0.000551246	0.000556174	24.3957	348.51	0	30	545	575	60	59
	260	Herschel Island N	Mr	stable	0	YES	39.85	15.38	819.89	39.81	40.7	0.89	729.702	0.502	366.31	411.585	0	0.0178646	0.068358	0.415667	0.50189	0.131298	0.0690805	22.416	22.6164	0.0921362	0.0484763	15.7301	15.8707	6.54398	25.0403	152.263	183.847	0.859209	1.72979	3413.13	4157.96	4.80957e-05	2.53049e-05	0.00821121	0.00828461	363.392	408.305	0	30	545	575	60	59
	273	Herschel Island E	Mr	active	490.2	YES	0	0	327.5	26.73	31.83	5.1	1670.25	0.5552	927.323	181.828	745.495	0.04375	0.236218	0.275366	0.555333	0.321545	0.238714	14.8498	15.4101	0.0673777	0.0500211	3.11169	3.22909	40.5704	219.05	255.353	514.973	13.0452	52.2904	3791.95	7935.79	0.000298176	0.000221365	0.0137706	0.0142901	742.927	145.672	597.255	34	273	307	25	24
	292	Herschel Island S	Mr	stable	66.25	YES	0	0	4460.45	0.64	3.05	2.41	10749.7	0.6267	6736.83	2795.36	3941.46	0.139205	0	0.487576	0.626781	1.0231	0	26.2939	27.317	0.0683122	0	1.75564	1.82395	937.797	0	3284.72	4222.51	959.458	0	86367.9	115346	0.00689243	0	0.177137	0.18403	4012.86	1665.09	2347.77	36	47	83	6	5
	298	Stokes Point W	Mm	stable	93.88	NO	13.39	9.77	4702.46	13.37	13.54	0.17	799.418	0.5315	424.891	2499.36	0	0.0457386	0.0706102	0.415126	0.531475	0.336161	0.0713566	22.3868	22.7943	0.019903	0.00422479	1.32545	1.34957	19.4339	30.0016	176.383	225.819	6.53292	2.14081	3948.65	5147.37	0.000142832	3.03188e-05	0.00951193	0.00968508	374.527	2203.1	0	73	393	466	22	21
	304	Kay Point SE	Mr	stable	543.28	NO	22.04	13.99	91202.1	24.78	25.43	0.65	59281.4	0.3822	22657.3	34857.5	0	0.0335417	0.0533333	0.295459	0.382334	0.246518	0.0538971	15.9334	16.2338	0.0304409	0.00665541	1.96752	2.00461	759.965	1208.39	6694.32	8662.67	187.345	65.1288	106663	140628	0.00558544	0.00122116	0.361009	0.367816	36624	56344.7	0	29	414	443	30	29
	305	Kay Point SE	Mr	stable	93.78	NO	11.14	14.53	7314.5	11.38	12.85	1.47	10752.3	0.3822	4109.53	2795.6	1313.93	0.0335417	0.0533333	0.295459	0.382334	0.246518	0.0538971	15.9334	16.2338	0.0304409	0.00665541	1.96752	2.00461	137.841	219.175	1214.2	1571.22	33.9802	11.8129	19346.4	25506.9	0.00101307	0.000221492	0.065479	0.0667135	6642.78	4518.9	2123.88	29	414	443	30	29
	306	Kay Point SE	Mr	stable	11.91	NO	29.04	12.27	87729.2	2.95	3.32	0.37	32459.8	0.3822	12406.1	33530.1	0	0.0335417	0.0533333	0.295459	0.382334	0.246518	0.0538971	15.9334	16.2338	0.0304409	0.00665541	1.96752	2.00461	416.122	661.66	3665.5	4743.29	102.582	35.6616	58404	77001.7	0.00305833	0.000668654	0.197672	0.201399	20053.7	54199.1	0	29	414	443	30	29
	309	Phillips Bay	L	stable	64.23	NO	6.66	12.75	18846.8	5.99	8.13	2.15	40520.7	0.4718	19117.7	8891.94	10225.7	0.0586418	0	0.413296	0.471938	0.430994	0	22.2881	22.7191	0.0141055	0	0.729442	0.743547	1121.1	0	7901.26	9022.35	483.185	0	176104	204980	0.0082396	0	0.426097	0.434336	21403	9954.9	11448.1	47	96	143	7	6
	310	Phillips Bay	L	stable	282.92	NO	3.73	11.89	10763.5	6.44	7.47	1.03	11086.4	0.4718	5230.59	5078.24	152.347	0.0586418	0	0.413296	0.471938	0.430994	0	22.2881	22.7191	0.0141055	0	0.729442	0.743547	306.731	0	2161.78	2468.51	132.199	0	48182	56082.4	0.00225435	0	0.11658	0.118834	5855.86	5685.3	170.559	47	96	143	7	6
	311	Sabine Point E	L	stable	0	YES	15.33	16.98	1003.04	15.31	16.94	1.63	1634.96	0.3817	624.062	382.86	241.202	0.014875	0.1246	0.242348	0.381823	0.109325	0.125917	13.0693	13.3045	0.00134117	0.00154471	0.160329	0.163215	9.28293	77.7582	151.24	238.281	1.01486	9.79108	1976.6	3170.21	6.82258e-05	7.85801e-05	0.00815603	0.00830284	1010.89	620.18	390.713	46	378	424	25	24
	312	Sabine Point	Mm	stable	136.13	NO	16.02	15.11	11287.2	15.99	17.07	1.08	12190.1	0.5965	7271.41	6732.79	538.623	0.0136719	0.16975	0.413407	0.596829	0.100483	0.171544	22.2941	22.5661	0.0085606	0.0146147	1.89934	1.92251	99.4139	1234.32	3006.05	4339.79	9.98938	211.741	67017.2	97932.2	0.000730652	0.00124737	0.16211	0.164088	4918.72	4554.37	364.35	59	805	864	40	39
	313	Shingle Point W	Mm	stable	6.17	NO	21.51	12.6	59248.3	15.41	17.13	1.72	101907	0.462	47081.1	27372.7	19708.4	0.0387019	0.108814	0.314636	0.462152	0.284444	0.109964	16.9676	17.362	0.0191616	0.00740778	1.14303	1.1696	1822.13	5123.09	14813.4	21758.6	518.293	563.356	251347	377773	0.0133919	0.00517724	0.798852	0.817421	54826	31875.6	22950.4	35	268	303	26	25
	314	Shingle Point W	Mm	stable	20.57	NO	18.43	20.12	7612.5	15.02	17.02	2.01	15301.1	0.462	7069.12	3516.98	3552.14	0.0387019	0.108814	0.314636	0.462152	0.284444	0.109964	16.9676	17.362	0.0191616	0.00740778	1.14303	1.1696	273.589	769.22	2224.2	3267.01	77.8205	84.5867	37739.2	56721.7	0.00201077	0.000777351	0.119946	0.122734	8232.01	4095.52	4136.48	35	268	303	26	25
	316	Shingle Point W	Mm	stable	29.28	NO	15.68	13.75	33062.2	2.15	15.21	13.05	431462	0.462	199335	15274.7	184061	0.0387019	0.108814	0.314636	0.462152	0.284444	0.109964	16.9676	17.362	0.0191616	0.00740778	1.14303	1.1696	7714.66	21690.5	62718	92123.1	2194.39	2385.18	1.06417e+06	1.59944e+06	0.0566996	0.0219198	3.38224	3.46086	232126	17787.5	214339	35	268	303	26	25
	317	Shingle Point W	Mm	stable	137.28	NO	25.47	13.94	81241.7	21.28	21.5	0.22	17873.2	0.462	8257.4	37533.7	0	0.0387019	0.108814	0.314636	0.462152	0.284444	0.109964	16.9676	17.362	0.0191616	0.00740778	1.14303	1.1696	319.577	898.522	2598.07	3816.17	90.9018	98.8053	44083	66256.4	0.00234877	0.000908019	0.140108	0.143365	9615.77	43708	0	35	268	303	26	25
	319	King Point SE	L	stable	41.05	NO	5.84	14.74	1608.42	5.8	7.23	1.43	2300.04	0.7358	1692.37	1183.48	508.894	0.111806	0.35625	0.267819	0.735875	0.821726	0.360016	14.4429	15.6246	0.0438504	0.0192118	0.770727	0.833789	189.216	602.907	453.249	1245.37	155.484	217.056	6546.23	19458.5	0.00139066	0.000609279	0.0244427	0.0264426	607.671	424.945	182.726	31	85	116	12	11
	323	King Point SE	L	stable	104.66	NO	9.88	10.01	136130	3.03	11.23	8.21	1.11763e+06	0.7358	822352	100165	722187	0.111806	0.35625	0.267819	0.735875	0.821726	0.360016	14.4429	15.6246	0.0438504	0.0192118	0.770727	0.833789	91943.5	292963	220242	605148	75552.4	105471	3.18093e+06	9.45521e+06	0.675748	0.296059	11.8771	12.8489	295278	35965.6	259312	31	85	116	12	11
	324	King Point NW	Mm	stable	9.81	NO	19.14	13.37	97951.3	17.28	18.78	1.5	146927	0.4753	69834.4	46556.2	23278.1	0.0251563	0.1	0.350291	0.475448	0.184888	0.101057	18.8904	19.1764	0.00705739	0.00385746	0.721068	0.731983	1756.77	6983.44	24462.4	33202.6	324.806	705.725	462104	636705	0.0129116	0.00705725	1.3192	1.33917	77092.6	51395	25697.5	40	576	616	40	39
	326	Kay Point SE	Mr	stable	0	NO	47.84	12.17	10759.7	47.94	48.7	0.77	8285	0.3822	3166.53	4112.37	0	0.0335417	0.0533333	0.295459	0.382334	0.246518	0.0538971	15.9334	16.2338	0.0304409	0.00665541	1.96752	2.00461	106.211	168.881	935.579	1210.67	26.1828	9.10221	14907	19653.8	0.000780605	0.000170667	0.0504536	0.0514049	5118.47	6647.37	0	29	414	443	30	29
	327	Kay Point SE	Mr	stable	129.29	NO	18.27	11.02	23359.2	18.57	20.54	1.97	46017.7	0.3822	17588	8927.9	8660.06	0.0335417	0.0533333	0.295459	0.382334	0.246518	0.0538971	15.9334	16.2338	0.0304409	0.00665541	1.96752	2.00461	589.93	938.025	5196.52	6724.48	145.428	50.5568	82798.4	109164	0.00433575	0.00094794	0.280237	0.28552	28429.7	14431.3	13998.4	29	414	443	30	29
	328	Kay Point SE	Mr	stable	106.65	NO	22.19	12.8	35781	22.18	27.7	5.52	197511	0.3822	75488.8	13675.5	61813.3	0.0335417	0.0533333	0.295459	0.382334	0.246518	0.0538971	15.9334	16.2338	0.0304409	0.00665541	1.96752	2.00461	2532.02	4026.07	22303.8	28861.9	624.188	216.993	355377	468540	0.0186093	0.00406862	1.20279	1.22547	122022	22105.5	99916.9	29	414	443	30	29
	332	Herschel Island E	Mr	stable	44.65	NO	15.21	7.82	18991	8.15	10.96	2.81	53364.6	0.5552	29628	10543.8	19084.2	0.04375	0.236218	0.275366	0.555333	0.321545	0.238714	14.8498	15.4101	0.0673777	0.0500211	3.11169	3.22909	1296.23	6998.66	8158.54	16453.4	416.795	1670.68	121153	253549	0.00952674	0.00707263	0.439971	0.45657	23736.6	8447.17	15289.4	34	273	307	25	24
	333	Herschel Island E	Mr	stable	75.74	NO	26.63	10.07	123623	10.1	15.08	4.98	615644	0.5552	341806	68635.7	273170	0.04375	0.236218	0.275366	0.555333	0.321545	0.238714	14.8498	15.4101	0.0673777	0.0500211	3.11169	3.22909	14954	80740.5	94121.6	189816	4808.38	19273.9	1.39769e+06	2.92508e+06	0.109906	0.081594	5.07576	5.26726	273839	54987.7	218851	34	273	307	25	24
	334	Herschel Island E	Mr	stable	22.79	NO	17.79	18.69	21948.1	16.51	21.59	5.08	111496	0.5552	61902.7	12185.6	49717.1	0.04375	0.236218	0.275366	0.555333	0.321545	0.238714	14.8498	15.4101	0.0673777	0.0500211	3.11169	3.22909	2708.24	14622.5	17045.9	34376.6	870.822	3490.61	253129	529747	0.0199045	0.0147771	0.919245	0.953927	49593.5	9762.51	39831	34	273	307	25	24
	335	Herschel Island E	Mr	stable	0	YES	27.01	8.28	2402.86	27.05	28.22	1.17	2811.35	0.5552	1560.86	1334.07	226.792	0.04375	0.236218	0.275366	0.555333	0.321545	0.238714	14.8498	15.4101	0.0673777	0.0500211	3.11169	3.22909	68.2876	368.703	429.807	866.797	21.9575	88.0146	6382.57	13357.4	0.000501887	0.0003726	0.0231785	0.024053	1250.49	1068.79	181.695	34	273	307	25	24
	337	Stokes Point W	Mm	stable	0	NO	13.9	13.74	1746.14	13.88	13.9	0.03	52.3842	0.5315	27.8422	928.073	0	0.0457386	0.0706102	0.415126	0.531475	0.336161	0.0713566	22.3868	22.7943	0.019903	0.00422479	1.32545	1.34957	1.27346	1.96594	11.558	14.7974	0.428089	0.140283	258.747	337.297	9.35945e-06	1.98672e-06	0.000623297	0.000634643	24.542	818.067	0	73	393	466	22	21
	340	Sabine Point E	L	stable	46.03	NO	18.8	11.16	14327.5	19.07	20.75	1.68	24070.3	0.3817	9187.62	5468.82	3718.8	0.014875	0.1246	0.242348	0.381823	0.109325	0.125917	13.0693	13.3045	0.00134117	0.00154471	0.160329	0.163215	136.666	1144.78	2226.6	3508.04	14.941	144.147	29100	46672.7	0.00100444	0.00115688	0.120075	0.122237	14882.6	8858.72	6023.93	46	378	424	25	24
	341	King Point SE	L	stable	431.56	NO	8.22	11.67	35396	8.57	9.68	1.11	39289.5	0.7358	28909.3	26044.4	2864.88	0.111806	0.35625	0.267819	0.735875	0.821726	0.360016	14.4429	15.6246	0.0438504	0.0192118	0.770727	0.833789	3232.21	10298.9	7742.46	21273.6	2656	3707.77	111823	332392	0.0237555	0.0104078	0.417533	0.451696	10380.3	9351.62	1028.68	31	85	116	12	11
	342	Kay Point SE	Mr	stable	205.19	NO	13.57	12.09	22536.4	13.63	15.13	1.51	34029.9	0.3822	13006.2	8613.41	4392.84	0.0335417	0.0533333	0.295459	0.382334	0.246518	0.0538971	15.9334	16.2338	0.0304409	0.00665541	1.96752	2.00461	436.251	693.666	3842.81	4972.73	107.544	37.3866	61229.2	80726.5	0.00320627	0.000700999	0.207234	0.211141	21023.7	13923	7100.72	29	414	443	30	29
	343	Kay Point SE	Mr	stable	391.04	NO	18.84	12.01	55450.9	18.89	19.14	0.25	13862.7	0.3822	5298.33	21193.3	0	0.0335417	0.0533333	0.295459	0.382334	0.246518	0.0538971	15.9334	16.2338	0.0304409	0.00665541	1.96752	2.00461	177.715	282.578	1565.44	2025.73	43.8099	15.2301	24942.8	32885.4	0.00130613	0.000285565	0.0844206	0.0860123	8564.39	34257.6	0	29	414	443	30	29
	346	Kay Point SE	Mr	stable	849.39	NO	14.49	8.5	147575	14.57	15.17	0.6	88545.2	0.3822	33842	56403.3	0	0.0335417	0.0533333	0.295459	0.382334	0.246518	0.0538971	15.9334	16.2338	0.0304409	0.00665541	1.96752	2.00461	1135.12	1804.91	9998.92	12938.9	279.826	97.2791	159317	210049	0.00834265	0.00182398	0.539219	0.549385	54703.2	91172.1	0	29	414	443	30	29
	348	Stokes Point SE	L	stable	28.47	NO	5.33	12.63	8870.69	5.29	6.78	1.49	13217.3	0.5559	7347.51	4931.22	2416.3	0.0762344	0	0.479706	0.55594	0.560292	0	25.8694	26.4297	-0.00768228	0	-0.354701	-0.362383	560.133	0	3524.65	4084.78	313.838	0	91180.6	107960	0.00411675	0	0.190076	0.194193	5869.82	3939.47	1930.34	42	137	179	10	9
	349	Stokes Point W	Mm	stable	29.91	YES	10.1	11.44	2393.1	10.11	11.36	1.25	2991.38	0.5315	1589.92	1271.93	317.983	0.0457386	0.0706102	0.415126	0.531475	0.336161	0.0713566	22.3868	22.7943	0.019903	0.00422479	1.32545	1.34957	72.7206	112.264	660.015	845	24.4458	8.0108	14775.6	19261.2	0.000534467	0.000113451	0.0355931	0.036241	1401.46	1121.17	280.292	73	393	466	22	21
	350	Roland Bay W	Mm	stable	716.65	NO	7.44	12.88	42804.5	9.78	10.85	1.07	45800.8	0.515	23587.4	22044.3	1543.1	0.0529605	0.0707602	0.391401	0.515122	0.389239	0.0715082	21.1074	21.5681	0.00928457	0.00170569	0.503477	0.514467	1249.2	1669.05	9232.14	12150.4	486.238	119.351	194866	262061	0.00918113	0.00168669	0.497868	0.508736	22213.4	20760.2	1453.21	55	347	402	19	18
	354	Kay Point SE	Mr	stable	142.06	NO	5.77	10.59	7621.73	5.87	8.48	2.61	19892.7	0.3822	7603	2913.03	4689.97	0.0335417	0.0533333	0.295459	0.382334	0.246518	0.0538971	15.9334	16.2338	0.0304409	0.00665541	1.96752	2.00461	255.017	405.493	2246.37	2906.88	62.8663	21.8549	35792.4	47189.9	0.00187427	0.000409779	0.121142	0.123426	12289.7	4708.7	7581.01	29	414	443	30	29
	355	King Point NW	Mm	stable	10.98	NO	32.31	23.08	136157	38.73	42.82	4.08	555520	0.4753	264039	64715.3	199323	0.0251563	0.1	0.350291	0.475448	0.184888	0.101057	18.8904	19.1764	0.00705739	0.00385746	0.721068	0.731983	6642.22	26403.9	92490.5	125537	1228.07	2668.29	1.74718e+06	2.40733e+06	0.0488177	0.0266829	4.9878	5.0633	291481	71441.5	220040	40	576	616	40	39
	357	Kay Point SE	Mr	stable	12.59	NO	22.13	17.84	66253.1	15.22	16.69	1.47	97392	0.3822	37223.2	25321.9	11901.3	0.0335417	0.0533333	0.295459	0.382334	0.246518	0.0538971	15.9334	16.2338	0.0304409	0.00665541	1.96752	2.00461	1248.53	1985.24	10997.9	14231.7	307.785	106.999	175235	231035	0.00917619	0.00200622	0.593094	0.604276	60168.8	40931.2	19237.6	29	414	443	30	29
	361	Stokes Point SE	L	stable	0	NO	7.6	16.46	401.44	8.24	8.28	0.04	16.0576	0.5559	8.92642	223.16	0	0.0762344	0	0.479706	0.55594	0.560292	0	25.8694	26.4297	-0.00768228	0	-0.354701	-0.362383	0.6805	0	4.28206	4.96256	0.381279	0	110.774	131.159	5.0014e-06	0	0.000230921	0.000235923	7.13118	178.28	0	42	137	179	10	9
	362	Stokes Point SE	L	stable	0	NO	6.87	13.92	1767.2	8.24	8.28	0.04	70.688	0.5559	39.2955	982.386	0	0.0762344	0	0.479706	0.55594	0.560292	0	25.8694	26.4297	-0.00768228	0	-0.354701	-0.362383	2.99566	0	18.8503	21.8459	1.67845	0	487.646	577.382	2.20169e-05	0	0.00101655	0.00103857	31.3925	784.814	0	42	137	179	10	9
	363	Kay Point SE	Mr	stable	27.67	NO	35	14.54	79882.1	33.79	38.52	4.73	377842	0.3822	144411	30530.9	113880	0.0335417	0.0533333	0.295459	0.382334	0.246518	0.0538971	15.9334	16.2338	0.0304409	0.00665541	1.96752	2.00461	4843.8	7701.94	42667.6	55213.4	1194.08	415.112	679841	896325	0.0356	0.00778335	2.30097	2.34435	233431	49351.1	184080	29	414	443	30	29
	364	Kay Point SE	Mr	stable	212.38	NO	24.91	18.32	33889.1	25.04	26.72	1.67	56594.8	0.3822	21630.5	12952.4	8678.12	0.0335417	0.0533333	0.295459	0.382334	0.246518	0.0538971	15.9334	16.2338	0.0304409	0.00665541	1.96752	2.00461	725.524	1153.63	6390.94	8270.09	178.855	62.1772	101829	134255	0.00533231	0.00116582	0.344648	0.351147	34964.3	20936.7	14027.6	29	414	443	30	29
	365	Kay Point SE	Mr	stable	208.12	NO	11.52	12.16	15479.9	11.51	12.77	1.26	19504.7	0.3822	7454.68	5916.41	1538.27	0.0335417	0.0533333	0.295459	0.382334	0.246518	0.0538971	15.9334	16.2338	0.0304409	0.00665541	1.96752	2.00461	250.042	397.583	2202.55	2850.18	61.6399	21.4286	35094.2	46269.3	0.00183771	0.000401785	0.118779	0.121018	12050	9563.48	2486.5	29	414	443	30	29
	440	Kay Point SE	Mr	active	21.05	YES	17.63	6.32	447.67	8.67	10.28	1.62	725.225	0.3822	277.181	171.099	106.082	0.0335417	0.0533333	0.295459	0.382334	0.246518	0.0538971	15.9334	16.2338	0.0304409	0.00665541	1.96752	2.00461	9.29712	14.783	81.8957	105.976	2.29191	0.79676	1304.88	1720.39	6.83301e-05	1.49393e-05	0.00441644	0.00449971	448.044	276.571	171.474	29	414	443	30	29
	441	Kay Point SE	Mr	active	80.17	YES	16.08	6.08	1776.15	8.67	10.28	1.62	2877.36	0.3822	1099.73	678.845	420.884	0.0335417	0.0533333	0.295459	0.382334	0.246518	0.0538971	15.9334	16.2338	0.0304409	0.00665541	1.96752	2.00461	36.8867	58.6522	324.925	420.464	9.09323	3.16118	5177.16	6825.74	0.000271103	5.92721e-05	0.0175224	0.0178528	1777.63	1097.31	680.329	29	414	443	30	29
	442	Kay Point SE	Mr	stable	42.68	YES	0	7.5	734.95	7.2	7.47	0.28	205.786	0.3822	78.6514	280.898	0	0.0335417	0.0533333	0.295459	0.382334	0.246518	0.0538971	15.9334	16.2338	0.0304409	0.00665541	1.96752	2.00461	2.6381	4.19474	23.2383	30.0711	0.650339	0.226084	370.265	488.17	1.9389e-05	4.23908e-06	0.00125319	0.00127681	127.135	454.052	0	29	414	443	30	29
	443	Kay Point SE	Mr	active	20.37	YES	20.81	7.7	678.08	10.86	12.97	2.1	1423.97	0.3822	544.241	259.162	285.078	0.0335417	0.0533333	0.295459	0.382334	0.246518	0.0538971	15.9334	16.2338	0.0304409	0.00665541	1.96752	2.00461	18.2547	29.0262	160.801	208.082	4.50012	1.56443	2562.11	3377.96	0.000134165	2.9333e-05	0.00867162	0.00883511	879.727	418.918	460.81	29	414	443	30	29
[truncated: 4 more columns]

## Sheet: Sheet1
Segment_name	Pore ice	Wedge ice	Massive ice			TVSURTS	TVSBRTS		McURTS	McBRTS	McTRTS		Segment_na	DOCPI	DOCWI	DOCMI	TDOCPI	TDOCWI	TDOCMI	TDOC			DOC stock WI	DOC stock MIB	DOC stock NMI	DOC stock	DOC flux IW	DOC flux MIB	DOC flux NMI	DOC flux	DOC stock WIRTS	DOC stock MIBRTS	DOC stock NMIRTS	DOC stock RTS	DOC flux IWRTS	DOC flux MIBRTS	DOC flux NMIRTS	DOC flux RTS	DOC flux IWRTS	DOC flux MIBRTS	DOC flux NMIRTS	DOC flux RTS
Herschel Island E	49.5711	7.88043	42.5485			494.502	-202.746		16813.1	0	16813.1												g m3	g m3	g m3	g m3	Mg y-1	Mg y-1	Mg y-1	Mg y-1	g	g	g	g	g y-1	g y-1	g y-1	g y-1	Mg y-1	Mg y-1	Mg y-1	Mg y-1
Herschel Island N	82.8246	3.55859	13.6168			451.774	-1197.2		15360.3	-13618.2	1742.16												3	3	3	3	3	3	3	3
Herschel Island S	77.7879	22.2121	0			32720.6	31411.8		1.1125e+06	357309	1.46981e+06		Herschel Island E	0.00278	0.0115	0.00271	#REF!	#REF!	#REF!	#REF!			0.321545	0.238714	14.8498	15.4101	0.0631666	0.0468948	2.91721	3.02727	#REF!	#REF!	#REF!	#REF!	#REF!	#REF!	#REF!	#REF!	#REF!	#REF!	#REF!	#REF!
Herschel Island W	80.1973	3.72919	16.0735			6353.58	-29804.8		216022	-339029	-123007		Herschel Island E	0.00278	0.0115	0.00271	#REF!	#REF!	#REF!	#REF!			0.321545	0.238714	14.8498	15.4101	0.0631666	0.0468948	2.91721	3.02727	#REF!	#REF!	#REF!	#REF!	#REF!	#REF!	#REF!	#REF!	#REF!	#REF!	#REF!	#REF!
Kay Point SE	77.2712	8.7754	13.9534			454.434	-2078		15450.8	-23637.3	-8186.52		Herschel Island E	0.00278	0.0115	0.00271	#REF!	#REF!	#REF!	#REF!			0.321545	0.238714	14.8498	15.4101	0.0631666	0.0468948	2.91721	3.02727	#REF!	#REF!	#REF!	#REF!	#REF!	#REF!	#REF!	#REF!	#REF!	#REF!	#REF!	#REF!
Kay Point spit	100	0	0			1065.07	479.283		36212.5	5451.85	41664.3		Herschel Island E	0.00278	0.0115	0.00271	#REF!	#REF!	#REF!	#REF!			0.321545	0.238714	14.8498	15.4101	0.0631666	0.0468948	2.91721	3.02727	#REF!	#REF!	#REF!	#REF!	#REF!	#REF!	#REF!	#REF!	#REF!	#REF!	#REF!	#REF!
King Point	72.4092	27.5908	0			5537.4	-3488.56		188271	0	188271		Herschel Island E	0.00278	0.0115	0.00271	#REF!	#REF!	#REF!	#REF!			0.321545	0.238714	14.8498	15.4101	0.0631666	0.0468948	2.91721	3.02727	#REF!	#REF!	#REF!	#REF!	#REF!	#REF!	#REF!	#REF!	#REF!	#REF!	#REF!	#REF!
King Point lagoon	100	0	0			92594.1	125002		3.1482e+06	1.4219e+06	4.5701e+06		Herschel Island E	0.00278	0.0115	0.00271	#REF!	#REF!	#REF!	#REF!			0.321545	0.238714	14.8498	15.4101	0.0631666	0.0468948	2.91721	3.02727	#REF!	#REF!	#REF!	#REF!	#REF!	#REF!	#REF!	#REF!	#REF!	#REF!	#REF!	#REF!
King Point NW	73.6676	5.29278	21.0396			383.88	-437.623		13051.9	-4977.97	8073.96		Herschel Island E	0.00278	0.0115	0.00271	#REF!	#REF!	#REF!	#REF!			0.321545	0.238714	14.8498	15.4101	0.0631666	0.0468948	2.91721	3.02727	#REF!	#REF!	#REF!	#REF!	#REF!	#REF!	#REF!	#REF!	#REF!	#REF!	#REF!	#REF!
King Point SE	36.3854	15.1958	48.4188			921.715	1668.3		31338.3	18977	50315.2		Herschel Island E	0.00278	0.0115	0.00271	#REF!	#REF!	#REF!	#REF!			0.321545	0.238714	14.8498	15.4101	0.0631666	0.0468948	2.91721	3.02727	#REF!	#REF!	#REF!	#REF!	#REF!	#REF!	#REF!	#REF!	#REF!	#REF!	#REF!	#REF!
Komakuk Beach	85.6864	14.3136	0			2416.35	9617.09		82156	109394	191550		Herschel Island E	0.00278	0.0115	0.00271	#REF!	#REF!	#REF!	#REF!			0.321545	0.238714	14.8498	15.4101	0.0631666	0.0468948	2.91721	3.02727	#REF!	#REF!	#REF!	#REF!	#REF!	#REF!	#REF!	#REF!	#REF!	#REF!	#REF!	#REF!
Komakuk Beach W1	39.0815	12.0061	48.9124			9216.3	36680.9		313354	417245	730600		Herschel Island E	0.00278	0.0115	0.00271	#REF!	#REF!	#REF!	#REF!			0.321545	0.238714	14.8498	15.4101	0.0631666	0.0468948	2.91721	3.02727	#REF!	#REF!	#REF!	#REF!	#REF!	#REF!	#REF!	#REF!	#REF!	#REF!	#REF!	#REF!
Komakuk Beach W2	86.2468	13.7532	0			570.127	2326.12		19384.3	26459.6	45843.9		Herschel Island E	0.00278	0.0115	0.00271	#REF!	#REF!	#REF!	#REF!			0.321545	0.238714	14.8498	15.4101	0.0631666	0.0468948	2.91721	3.02727	#REF!	#REF!	#REF!	#REF!	#REF!	#REF!	#REF!	#REF!	#REF!	#REF!	#REF!	#REF!
Malcolm River fan	0	0	0			21264.7	5954.12		723000	67728.1	790728		Herschel Island E	0.00278	0.0115	0.00271	#REF!	#REF!	#REF!	#REF!			0.321545	0.238714	14.8498	15.4101	0.0631666	0.0468948	2.91721	3.02727	#REF!	#REF!	#REF!	#REF!	#REF!	#REF!	#REF!	#REF!	#REF!	#REF!	#REF!	#REF!
Malcolm River fan with barrier islands	0	0	0			26414.5	7396.05		898092	84130.1	982222		Herschel Island E	0.00278	0.0115	0.00271	#REF!	#REF!	#REF!	#REF!			0.321545	0.238714	14.8498	15.4101	0.0631666	0.0468948	2.91721	3.02727	#REF!	#REF!	#REF!	#REF!	#REF!	#REF!	#REF!	#REF!	#REF!	#REF!	#REF!	#REF!
Phillips Bay	87.5706	12.4294	0			793.977	142.916		26995.2	1625.67	28620.9		Herschel Island E	0.00278	0.0115	0.00271	#REF!	#REF!	#REF!	#REF!			0.321545	0.238714	14.8498	15.4101	0.0631666	0.0468948	2.91721	3.02727	#REF!	#REF!	#REF!	#REF!	#REF!	#REF!	#REF!	#REF!	#REF!	#REF!	#REF!	#REF!
Phillips Bay NW	59.1401	13.5632	27.2967			944.985	-434.693		28349.5	0	28349.5		Herschel Island E	0.00278	0.0115	0.00271	#REF!	#REF!	#REF!	#REF!			0.321545	0.238714	14.8498	15.4101	0.0631666	0.0468948	2.91721	3.02727	#REF!	#REF!	#REF!	#REF!	#REF!	#REF!	#REF!	#REF!	#REF!	#REF!	#REF!	#REF!
Phillips Bay W	100	0	0			1542.24	2575.54		55520.5	24210	79730.6		Herschel Island E	0.00278	0.0115	0.00271	#REF!	#REF!	#REF!	#REF!			0.321545	0.238714	14.8498	15.4101	0.0631666	0.0468948	2.91721	3.02727	#REF!	#REF!	#REF!	#REF!	#REF!	#REF!	#REF!	#REF!	#REF!	#REF!	#REF!	#REF!
Roland Bay E	95.2753	4.72469	0			268.638	-376.093		9670.96	-3535.27	6135.69		Herschel Island E	0.00278	0.0115	0.00271	#REF!	#REF!	#REF!	#REF!			0.321545	0.238714	14.8498	15.4101	0.0631666	0.0468948	2.91721	3.02727	#REF!	#REF!	#REF!	#REF!	#REF!	#REF!	#REF!	#REF!	#REF!	#REF!	#REF!	#REF!
Roland Bay NW	81.9848	18.0152	0			666.606	-253.31		23997.8	0	23997.8		Herschel Island E	0.00278	0.0115	0.00271	#REF!	#REF!	#REF!	#REF!			0.321545	0.238714	14.8498	15.4101	0.0631666	0.0468948	2.91721	3.02727	#REF!	#REF!	#REF!	#REF!	#REF!	#REF!	#REF!	#REF!	#REF!	#REF!	#REF!	#REF!
Roland Bay W	75.9766	10.2836	13.7398			326.526	-764.07		11754.9	-7182.26	4572.66		Herschel Island E	0.00278	0.0115	0.00271	#REF!	#REF!	#REF!	#REF!			0.321545	0.238714	14.8498	15.4101	0.0631666	0.0468948	2.91721	3.02727	#REF!	#REF!	#REF!	#REF!	#REF!	#REF!	#REF!	#REF!	#REF!	#REF!	#REF!	#REF!
Sabine Point	69.2527	2.29184	28.4554			411.38	-172.78		14809.7	0	14809.7		Herschel Island E	0.00278	0.0115	0.00271	#REF!	#REF!	#REF!	#REF!			0.321545	0.238714	14.8498	15.4101	0.0631666	0.0468948	2.91721	3.02727	#REF!	#REF!	#REF!	#REF!	#REF!	#REF!	#REF!	#REF!	#REF!	#REF!	#REF!	#REF!
Sabine Point E	63.4547	3.89755	32.6477			406.046	353.26		14617.7	3320.64	17938.3		Herschel Island E	0.00278	0.0115	0.00271	#REF!	#REF!	#REF!	#REF!			0.321545	0.238714	14.8498	15.4101	0.0631666	0.0468948	2.91721	3.02727	#REF!	#REF!	#REF!	#REF!	#REF!	#REF!	#REF!	#REF!	#REF!	#REF!	#REF!	#REF!
Sabine Point W	95.1033	4.89672	0			6165.3	22934.9		184959	211857	396816		Herschel Island E	0.00278	0.0115	0.00271	#REF!	#REF!	#REF!	#REF!			0.321545	0.238714	14.8498	15.4101	0.0631666	0.0468948	2.91721	3.02727	#REF!	#REF!	#REF!	#REF!	#REF!	#REF!	#REF!	#REF!	#REF!	#REF!	#REF!	#REF!
Shingle Point W	68.0715	8.37667	23.5518			2849.96	1652.98		85498.8	15269	100768		Herschel Island E	0.00278	0.0115	0.00271	#REF!	#REF!	#REF!	#REF!			0.321545	0.238714	14.8498	15.4101	0.0631666	0.0468948	2.91721	3.02727	#REF!	#REF!	#REF!	#REF!	#REF!	#REF!	#REF!	#REF!	#REF!	#REF!	#REF!	#REF!
Stokes Point	100	0	0			369.715	-1009.32		11091.5	-9323.4	1768.05		Herschel Island E	0.00278	0.0115	0.00271	#REF!	#REF!	#REF!	#REF!			0.321545	0.238714	14.8498	15.4101	0.0631666	0.0468948	2.91721	3.02727	#REF!	#REF!	#REF!	#REF!	#REF!	#REF!	#REF!	#REF!	#REF!	#REF!	#REF!	#REF!
Stokes Point SE	86.2853	13.7147	0			427.897	-1459.37		12836.9	-13480.6	-643.716		Herschel Island E	0.00278	0.0115	0.00271	#REF!	#REF!	#REF!	#REF!			0.321545	0.238714	14.8498	15.4101	0.0631666	0.0468948	2.91721	3.02727	#REF!	#REF!	#REF!	#REF!	#REF!	#REF!	#REF!	#REF!	#REF!	#REF!	#REF!	#REF!
Stokes Point W	78.1106	8.60507	13.2843			498.413	-473.493		14952.4	0	14952.4		Herschel Island E	0.00278	0.0115	0.00271	#REF!	#REF!	#REF!	#REF!			0.321545	0.238714	14.8498	15.4101	0.0631666	0.0468948	2.91721	3.02727	#REF!	#REF!	#REF!	#REF!	#REF!	#REF!	#REF!	#REF!	#REF!	#REF!	#REF!	#REF!
Whale Cove	100	0	0			873.457	-812.315		26203.7	0	26203.7		Herschel Island E	0.00278	0.0115	0.00271	#REF!	#REF!	#REF!	#REF!			0.321545	0.238714	14.8498	15.4101	0.0631666	0.0468948	2.91721	3.02727	#REF!	#REF!	#REF!	#REF!	#REF!	#REF!	#REF!	#REF!	#REF!	#REF!	#REF!	#REF!
Whale Cove E	33.0166	28.2027	38.7807			14940.1	-62733.1		448202	-579483	-131282		Herschel Island E	0.00278	0.0115	0.00271	#REF!	#REF!	#REF!	#REF!			0.321545	0.238714	14.8498	15.4101	0.0631666	0.0468948	2.91721	3.02727	#REF!	#REF!	#REF!	#REF!	#REF!	#REF!	#REF!	#REF!	#REF!	#REF!	#REF!	#REF!
Whale Cove W	86.1964	13.8036	0			553.851	-1257.24		16615.5	-11613.5	5002.02		Herschel Island N	0.00278	0.0115	0.00271	#REF!	#REF!	#REF!	#REF!			0.131298	0.0690805	22.416	22.6164	0.0934524	0.0491688	15.9548	16.0974	#REF!	#REF!	#REF!	#REF!	#REF!	#REF!	#REF!	#REF!	#REF!	#REF!	#REF!	#REF!
Workboat Passage E	63.0013	36.9987	0			23490.7	19027.5		1.29199e+06	298905	1.5909e+06		Herschel Island N	0.00278	0.0115	0.00271	#REF!	#REF!	#REF!	#REF!			0.131298	0.0690805	22.416	22.6164	0.0934524	0.0491688	15.9548	16.0974	#REF!	#REF!	#REF!	#REF!	#REF!	#REF!	#REF!	#REF!	#REF!	#REF!	#REF!	#REF!
Workboat Passage W	60.3646	39.6354	0			40134.9	173383		2.20742e+06	2.72369e+06	4.93111e+06		Herschel Island N	0.00278	0.0115	0.00271	#REF!	#REF!	#REF!	#REF!			0.131298	0.0690805	22.416	22.6164	0.0934524	0.0491688	15.9548	16.0974	#REF!	#REF!	#REF!	#REF!	#REF!	#REF!	#REF!	#REF!	#REF!	#REF!	#REF!	#REF!
						40707.3	321588		2.2389e+06	5.05185e+06	7.29075e+06		Herschel Island N	0.00278	0.0115	0.00271	#REF!	#REF!	#REF!	#REF!			0.131298	0.0690805	22.416	22.6164	0.0934524	0.0491688	15.9548	16.0974	#REF!	#REF!	#REF!	#REF!	#REF!	#REF!	#REF!	#REF!	#REF!	#REF!	#REF!	#REF!
						27600.7	75626		1.51804e+06	1.18802e+06	2.70606e+06		Herschel Island N	0.00278	0.0115	0.00271	#REF!	#REF!	#REF!	#REF!			0.131298	0.0690805	22.416	22.6164	0.0934524	0.0491688	15.9548	16.0974	#REF!	#REF!	#REF!	#REF!	#REF!	#REF!	#REF!	#REF!	#REF!	#REF!	#REF!	#REF!
						1502.27	-1667.52		82624.7	-26195.2	56429.5		Herschel Island N	0.00278	0.0115	0.00271	#REF!	#REF!	#REF!	#REF!			0.131298	0.0690805	22.416	22.6164	0.0934524	0.0491688	15.9548	16.0974	#REF!	#REF!	#REF!	#REF!	#REF!	#REF!	#REF!	#REF!	#REF!	#REF!	#REF!	#REF!
						8257.17	38973.9		454144	612244	1.06639e+06		Herschel Island N	0.00278	0.0115	0.00271	#REF!	#REF!	#REF!	#REF!			0.131298	0.0690805	22.416	22.6164	0.0934524	0.0491688	15.9548	16.0974	#REF!	#REF!	#REF!	#REF!	#REF!	#REF!	#REF!	#REF!	#REF!	#REF!	#REF!	#REF!
						4349.2	-10765.9		239206	-169123	70082.8		Herschel Island N	0.00278	0.0115	0.00271	#REF!	#REF!	#REF!	#REF!			0.131298	0.0690805	22.416	22.6164	0.0934524	0.0491688	15.9548	16.0974	#REF!	#REF!	#REF!	#REF!	#REF!	#REF!	#REF!	#REF!	#REF!	#REF!	#REF!	#REF!
						1415.54	-2080.84		77854.6	-32688.1	45166.5		Herschel Island N	0.00278	0.0115	0.00271	#REF!	#REF!	#REF!	#REF!			0.131298	0.0690805	22.416	22.6164	0.0934524	0.0491688	15.9548	16.0974	#REF!	#REF!	#REF!	#REF!	#REF!	#REF!	#REF!	#REF!	#REF!	#REF!	#REF!	#REF!
						2557.24	-6330.15		140648	-99440.9	41207.2		Herschel Island N	0.00278	0.0115	0.00271	#REF!	#REF!	#REF!	#REF!			0.131298	0.0690805	22.416	22.6164	0.0934524	0.0491688	15.9548	16.0974	#REF!	#REF!	#REF!	#REF!	#REF!	#REF!	#REF!	#REF!	#REF!	#REF!	#REF!	#REF!
						266.096	-337.942		9579.45	-3176.65	6402.79		Herschel Island N	0.00278	0.0115	0.00271	#REF!	#REF!	#REF!	#REF!			0.131298	0.0690805	22.416	22.6164	0.0934524	0.0491688	15.9548	16.0974	#REF!	#REF!	#REF!	#REF!	#REF!	#REF!	#REF!	#REF!	#REF!	#REF!	#REF!	#REF!
						337.172	-492.271		12138.2	-4627.35	7510.84		Herschel Island N	0.00278	0.0115	0.00271	#REF!	#REF!	#REF!	#REF!			0.131298	0.0690805	22.416	22.6164	0.0934524	0.0491688	15.9548	16.0974	#REF!	#REF!	#REF!	#REF!	#REF!	#REF!	#REF!	#REF!	#REF!	#REF!	#REF!	#REF!
						279.027	239.963		10045	2255.65	12300.6		Herschel Island N	0.00278	0.0115	0.00271	#REF!	#REF!	#REF!	#REF!			0.131298	0.0690805	22.416	22.6164	0.0934524	0.0491688	15.9548	16.0974	#REF!	#REF!	#REF!	#REF!	#REF!	#REF!	#REF!	#REF!	#REF!	#REF!	#REF!	#REF!
						32207	2254.49		1.77139e+06	43461.6	1.81485e+06		Herschel Island N	0.00278	0.0115	0.00271	#REF!	#REF!	#REF!	#REF!			0.131298	0.0690805	22.416	22.6164	0.0934524	0.0491688	15.9548	16.0974	#REF!	#REF!	#REF!	#REF!	#REF!	#REF!	#REF!	#REF!	#REF!	#REF!	#REF!	#REF!
						267.764	-639.955		14727	-12336.9	2390.09		Herschel Island N	0.00278	0.0115	0.00271	#REF!	#REF!	#REF!	#REF!			0.131298	0.0690805	22.416	22.6164	0.0934524	0.0491688	15.9548	16.0974	#REF!	#REF!	#REF!	#REF!	#REF!	#REF!	#REF!	#REF!	#REF!	#REF!	#REF!	#REF!
						1100.69	-2688.49		60537.8	-51828	8709.81		Herschel Island N	0.00278	0.0115	0.00271	#REF!	#REF!	#REF!	#REF!			0.131298	0.0690805	22.416	22.6164	0.0934524	0.0491688	15.9548	16.0974	#REF!	#REF!	#REF!	#REF!	#REF!	#REF!	#REF!	#REF!	#REF!	#REF!	#REF!	#REF!
						88.2943	-210.14		4856.18	-4051.04	805.145		Herschel Island N	0.00278	0.0115	0.00271	#REF!	#REF!	#REF!	#REF!			0.131298	0.0690805	22.416	22.6164	0.0934524	0.0491688	15.9548	16.0974	#REF!	#REF!	#REF!	#REF!	#REF!	#REF!	#REF!	#REF!	#REF!	#REF!	#REF!	#REF!
						6146.79	-9682.75		147523	-239302	-91779.4		Herschel Island N	0.00278	0.0115	0.00271	#REF!	#REF!	#REF!	#REF!			0.131298	0.0690805	22.416	22.6164	0.0934524	0.0491688	15.9548	16.0974	#REF!	#REF!	#REF!	#REF!	#REF!	#REF!	#REF!	#REF!	#REF!	#REF!	#REF!	#REF!
						530.462	312.973		12731.1	7734.9	20466		Herschel Island N	0.00278	0.0115	0.00271	#REF!	#REF!	#REF!	#REF!			0.131298	0.0690805	22.416	22.6164	0.0934524	0.0491688	15.9548	16.0974	#REF!	#REF!	#REF!	#REF!	#REF!	#REF!	#REF!	#REF!	#REF!	#REF!	#REF!	#REF!
						992.855	-2845.14		72478.4	-53244.8	19233.5		Herschel Island N	0.00278	0.0115	0.00271	#REF!	#REF!	#REF!	#REF!			0.131298	0.0690805	22.416	22.6164	0.0934524	0.0491688	15.9548	16.0974	#REF!	#REF!	#REF!	#REF!	#REF!	#REF!	#REF!	#REF!	#REF!	#REF!	#REF!	#REF!
						219.174	-629.028		15999.7	-11771.8	4227.86		Herschel Island N	0.00278	0.0115	0.00271	#REF!	#REF!	#REF!	#REF!			0.131298	0.0690805	22.416	22.6164	0.0934524	0.0491688	15.9548	16.0974	#REF!	#REF!	#REF!	#REF!	#REF!	#REF!	#REF!	#REF!	#REF!	#REF!	#REF!	#REF!
						1535.03	-5863.95		112057	-109740	2317.67		Herschel Island N	0.00278	0.0115	0.00271	#REF!	#REF!	#REF!	#REF!			0.131298	0.0690805	22.416	22.6164	0.0934524	0.0491688	15.9548	16.0974	#REF!	#REF!	#REF!	#REF!	#REF!	#REF!	#REF!	#REF!	#REF!	#REF!	#REF!	#REF!
						847.541	-2017.15		24578.7	-28796.5	-4217.83		Herschel Island S	0.00278	0.0115	0.00271	#REF!	#REF!	#REF!	#REF!			1.0231	0	26.2939	27.317	0	0	0	0	#REF!	#REF!	#REF!	#REF!	#REF!	#REF!	#REF!	#REF!	#REF!	#REF!	#REF!	#REF!
						277.627	-660.752		8051.18	-9432.81	-1381.62		Herschel Island S	0.00278	0.0115	0.00271	#REF!	#REF!	#REF!	#REF!			1.0231	0	26.2939	27.317	0	0	0	0	#REF!	#REF!	#REF!	#REF!	#REF!	#REF!	#REF!	#REF!	#REF!	#REF!	#REF!	#REF!
						356.631	-745.359		10342.3	-10640.6	-298.34		Herschel Island S	0.00278	0.0115	0.00271	#REF!	#REF!	#REF!	#REF!			1.0231	0	26.2939	27.317	0	0	0	0	#REF!	#REF!	#REF!	#REF!	#REF!	#REF!	#REF!	#REF!	#REF!	#REF!	#REF!	#REF!
						1074.71	-3049.36		31166.7	-43532.2	-12365.5		Herschel Island S	0.00278	0.0115	0.00271	#REF!	#REF!	#REF!	#REF!			1.0231	0	26.2939	27.317	0	0	0	0	#REF!	#REF!	#REF!	#REF!	#REF!	#REF!	#REF!	#REF!	#REF!	#REF!	#REF!	#REF!
						267.755	-854.137		7764.88	-12193.5	-4428.66		Herschel Island S	0.00278	0.0115	0.00271	#REF!	#REF!	#REF!	#REF!			1.0231	0	26.2939	27.317	0	0	0	0	#REF!	#REF!	#REF!	#REF!	#REF!	#REF!	#REF!	#REF!	#REF!	#REF!	#REF!	#REF!
						472.024	-1505.76		13688.7	-21496	-7807.28		Herschel Island S	0.00278	0.0115	0.00271	#REF!	#REF!	#REF!	#REF!			1.0231	0	26.2939	27.317	0	0	0	0	#REF!	#REF!	#REF!	#REF!	#REF!	#REF!	#REF!	#REF!	#REF!	#REF!	#REF!	#REF!
						417.361	-521.701		12103.5	-7447.73	4655.73		Herschel Island S	0.00278	0.0115	0.00271	#REF!	#REF!	#REF!	#REF!			1.0231	0	26.2939	27.317	0	0	0	0	#REF!	#REF!	#REF!	#REF!	#REF!	#REF!	#REF!	#REF!	#REF!	#REF!	#REF!	#REF!
						2229.01	-4415.75		64641.3	-63038.6	1602.65		Herschel Island S	0.00278	0.0115	0.00271	#REF!	#REF!	#REF!	#REF!			1.0231	0	26.2939	27.317	0	0	0	0	#REF!	#REF!	#REF!	#REF!	#REF!	#REF!	#REF!	#REF!	#REF!	#REF!	#REF!	#REF!
						452.526	-1416.41		13123.3	-20220.4	-7097.17		Herschel Island S	0.00278	0.0115	0.00271	#REF!	#REF!	#REF!	#REF!			1.0231	0	26.2939	27.317	0	0	0	0	#REF!	#REF!	#REF!	#REF!	#REF!	#REF!	#REF!	#REF!	#REF!	#REF!	#REF!	#REF!
						7979.34	-33368.1		231401	-476359	-244958		Herschel Island S	0.00278	0.0115	0.00271	#REF!	#REF!	#REF!	#REF!			1.0231	0	26.2939	27.317	0	0	0	0	#REF!	#REF!	#REF!	#REF!	#REF!	#REF!	#REF!	#REF!	#REF!	#REF!	#REF!	#REF!
						3210.97	5362.31		93118	76551.6	169670		Herschel Island S	0.00278	0.0115	0.00271	#REF!	#REF!	#REF!	#REF!			1.0231	0	26.2939	27.317	0	0	0	0	#REF!	#REF!	#REF!	#REF!	#REF!	#REF!	#REF!	#REF!	#REF!	#REF!	#REF!	#REF!
						5747.49	21438.1		166677	306048	472725		Herschel Island S	0.00278	0.0115	0.00271	#REF!	#REF!	#REF!	#REF!			1.0231	0	26.2939	27.317	0	0	0	0	#REF!	#REF!	#REF!	#REF!	#REF!	#REF!	#REF!	#REF!	#REF!	#REF!	#REF!	#REF!
						852.743	631.03		24729.6	9008.5	33738		Herschel Island S	0.00278	0.0115	0.00271	#REF!	#REF!	#REF!	#REF!			1.0231	0	26.2939	27.317	0	0	0	0	#REF!	#REF!	#REF!	#REF!	#REF!	#REF!	#REF!	#REF!	#REF!	#REF!	#REF!	#REF!
						544.498	255.914		15790.4	3653.39	19443.8		Herschel Island S	0.00278	0.0115	0.00271	#REF!	#REF!	#REF!	#REF!			1.0231	0	26.2939	27.317	0	0	0	0	#REF!	#REF!	#REF!	#REF!	#REF!	#REF!	#REF!	#REF!	#REF!	#REF!	#REF!	#REF!
						31543.9	-276729		914774	-3.95055e+06	-3.03578e+06		Herschel Island S	0.00278	0.0115	0.00271	#REF!	#REF!	#REF!	#REF!			1.0231	0	26.2939	27.317	0	0	0	0	#REF!	#REF!	#REF!	#REF!	#REF!	#REF!	#REF!	#REF!	#REF!	#REF!	#REF!	#REF!
						574.017	-1096.37		16646.5	-15651.6	994.83		Herschel Island S	0.00278	0.0115	0.00271	#REF!	#REF!	#REF!	#REF!			1.0231	0	26.2939	27.317	0	0	0	0	#REF!	#REF!	#REF!	#REF!	#REF!	#REF!	#REF!	#REF!	#REF!	#REF!	#REF!	#REF!
						1680.15	-588.053		48724.4	0	48724.4		Herschel Island S	0.00278	0.0115	0.00271	#REF!	#REF!	#REF!	#REF!			1.0231	0	26.2939	27.317	0	0	0	0	#REF!	#REF!	#REF!	#REF!	#REF!	#REF!	#REF!	#REF!	#REF!	#REF!	#REF!	#REF!
						653.886	-2418.41		18962.7	-34524.9	-15562.2		Herschel Island S	0.00278	0.0115	0.00271	#REF!	#REF!	#REF!	#REF!			1.0231	0	26.2939	27.317	0	0	0	0	#REF!	#REF!	#REF!	#REF!	#REF!	#REF!	#REF!	#REF!	#REF!	#REF!	#REF!	#REF!
						183.925	-115.873		5333.83	0	5333.83		Herschel Island S	0.00278	0.0115	0.00271	#REF!	#REF!	#REF!	#REF!			1.0231	0	26.2939	27.317	0	0	0	0	#REF!	#REF!	#REF!	#REF!	#REF!	#REF!	#REF!	#REF!	#REF!	#REF!	#REF!	#REF!
						322.936	-203.45		9365.16	0	9365.16		Herschel Island S	0.00278	0.0115	0.00271	#REF!	#REF!	#REF!	#REF!			1.0231	0	26.2939	27.317	0	0	0	0	#REF!	#REF!	#REF!	#REF!	#REF!	#REF!	#REF!	#REF!	#REF!	#REF!	#REF!	#REF!
						2006.06	-5163.45		58175.9	-73712.7	-15536.8		Herschel Island S	0.00278	0.0115	0.00271	#REF!	#REF!	#REF!	#REF!			1.0231	0	26.2939	27.317	0	0	0	0	#REF!	#REF!	#REF!	#REF!	#REF!	#REF!	#REF!	#REF!	#REF!	#REF!	#REF!	#REF!
						190.659	-432.797		5529.12	-6178.54	-649.425		Herschel Island S	0.00278	0.0115	0.00271	#REF!	#REF!	#REF!	#REF!			1.0231	0	26.2939	27.317	0	0	0	0	#REF!	#REF!	#REF!	#REF!	#REF!	#REF!	#REF!	#REF!	#REF!	#REF!	#REF!	#REF!
						442.567	-840.878		12834.4	-12004.3	830.195		Herschel Island S	0.00278	0.0115	0.00271	#REF!	#REF!	#REF!	#REF!			1.0231	0	26.2939	27.317	0	0	0	0	#REF!	#REF!	#REF!	#REF!	#REF!	#REF!	#REF!	#REF!	#REF!	#REF!	#REF!	#REF!
						5242.68	-21470.2		152038	-306506	-154468		Herschel Island S	0.00278	0.0115	0.00271	#REF!	#REF!	#REF!	#REF!			1.0231	0	26.2939	27.317	0	0	0	0	#REF!	#REF!	#REF!	#REF!	#REF!	#REF!	#REF!	#REF!	#REF!	#REF!	#REF!	#REF!
						347.723	149.521		10084	2134.54	12218.5		Herschel Island S	0.00278	0.0115	0.00271	#REF!	#REF!	#REF!	#REF!			1.0231	0	26.2939	27.317	0	0	0	0	#REF!	#REF!	#REF!	#REF!	#REF!	#REF!	#REF!	#REF!	#REF!	#REF!	#REF!	#REF!
						377.037	-795.548		10934.1	-11357.1	-423.062		Herschel Island S	0.00278	0.0115	0.00271	#REF!	#REF!	#REF!	#REF!			1.0231	0	26.2939	27.317	0	0	0	0	#REF!	#REF!	#REF!	#REF!	#REF!	#REF!	#REF!	#REF!	#REF!	#REF!	#REF!	#REF!
						223.557	31.298		6483.16	446.806	6929.96		Herschel Island S	0.00278	0.0115	0.00271	#REF!	#REF!	#REF!	#REF!			1.0231	0	26.2939	27.317	0	0	0	0	#REF!	#REF!	#REF!	#REF!	#REF!	#REF!	#REF!	#REF!	#REF!	#REF!	#REF!	#REF!
						938.586	-1858.4		27219	-26530.3	688.728		Herschel Island S	0.00278	0.0115	0.00271	#REF!	#REF!	#REF!	#REF!			1.0231	0	26.2939	27.317	0	0	0	0	#REF!	#REF!	#REF!	#REF!	#REF!	#REF!	#REF!	#REF!	#REF!	#REF!	#REF!	#REF!
						928.263	-1448.09		26919.6	-20672.7	6246.89		Herschel Island S	0.00278	0.0115	0.00271	#REF!	#REF!	#REF!	#REF!			1.0231	0	26.2939	27.317	0	0	0	0	#REF!	#REF!	#REF!	#REF!	#REF!	#REF!	#REF!	#REF!	#REF!	#REF!	#REF!	#REF!
						229.34	-465.56		6650.85	-6646.26	4.58679		Herschel Island S	0.00278	0.0115	0.00271	#REF!	#REF!	#REF!	#REF!			1.0231	0	26.2939	27.317	0	0	0	0	#REF!	#REF!	#REF!	#REF!	#REF!	#REF!	#REF!	#REF!	#REF!	#REF!	#REF!	#REF!
						507.195	-517.339		14708.7	-7385.46	7323.2		Herschel Island S	0.00278	0.0115	0.00271	#REF!	#REF!	#REF!	#REF!			1.0231	0	26.2939	27.317	0	0	0	0	#REF!	#REF!	#REF!	#REF!	#REF!	#REF!	#REF!	#REF!	#REF!	#REF!	#REF!	#REF!
						6432.31	-6303.66		186537	0	186537		Herschel Island W	0.00278	0.0115	0.00271	#REF!	#REF!	#REF!	#REF!			0.140676	0.083372	22.1987	22.4228	0.0421721	0.0249934	6.65478	6.72195	#REF!	#REF!	#REF!	#REF!	#REF!	#REF!	#REF!	#REF!	#REF!	#REF!	#REF!	#REF!
						603.924	-591.846		17513.8	0	17513.8		Herschel Island W	0.00278	0.0115	0.00271	#REF!	#REF!	#REF!	#REF!			0.140676	0.083372	22.1987	22.4228	0.0421721	0.0249934	6.65478	6.72195	#REF!	#REF!	#REF!	#REF!	#REF!	#REF!	#REF!	#REF!	#REF!	#REF!	#REF!	#REF!
						1628.61	1872.91		76544.9	29966.5	106511		Herschel Island W	0.00278	0.0115	0.00271	#REF!	#REF!	#REF!	#REF!			0.140676	0.083372	22.1987	22.4228	0.0421721	0.0249934	6.65478	6.72195	#REF!	#REF!	#REF!	#REF!	#REF!	#REF!	#REF!	#REF!	#REF!	#REF!	#REF!	#REF!
						560.315	-633.155		26334.8	-10130.5	16204.3		Herschel Island W	0.00278	0.0115	0.00271	#REF!	#REF!	#REF!	#REF!			0.140676	0.083372	22.1987	22.4228	0.0421721	0.0249934	6.65478	6.72195	#REF!	#REF!	#REF!	#REF!	#REF!	#REF!	#REF!	#REF!	#REF!	#REF!	#REF!	#REF!
						1200.28	-1920.44		33607.7	-30727.1	2880.66		Herschel Island W	0.00278	0.0115	0.00271	#REF!	#REF!	#REF!	#REF!			0.140676	0.083372	22.1987	22.4228	0.0421721	0.0249934	6.65478	6.72195	#REF!	#REF!	#REF!	#REF!	#REF!	#REF!	#REF!	#REF!	#REF!	#REF!	#REF!	#REF!
						1149.5	689.7		32186	11035.2	43221.2		Herschel Island W	0.00278	0.0115	0.00271	#REF!	#REF!	#REF!	#REF!			0.140676	0.083372	22.1987	22.4228	0.0421721	0.0249934	6.65478	6.72195	#REF!	#REF!	#REF!	#REF!	#REF!	#REF!	#REF!	#REF!	#REF!	#REF!	#REF!	#REF!
						374.282	-291.94		10854.2	0	10854.2		Herschel Island W	0.00278	0.0115	0.00271	#REF!	#REF!	#REF!	#REF!			0.140676	0.083372	22.1987	22.4228	0.0421721	0.0249934	6.65478	6.72195	#REF!	#REF!	#REF!	#REF!	#REF!	#REF!	#REF!	#REF!	#REF!	#REF!	#REF!	#REF!
						1271.48	-1563.92		36872.8	-22326.2	14546.6		Herschel Island W	0.00278	0.0115	0.00271	#REF!	#REF!	#REF!	#REF!			0.140676	0.083372	22.1987	22.4228	0.0421721	0.0249934	6.65478	6.72195	#REF!	#REF!	#REF!	#REF!	#REF!	#REF!	#REF!	#REF!	#REF!	#REF!	#REF!	#REF!
						842.339	-1036.08		24427.8	-14790.9	9636.94		Herschel Island W	0.00278	0.0115	0.00271	#REF!	#REF!	#REF!	#REF!			0.140676	0.083372	22.1987	22.4228	0.0421721	0.0249934	6.65478	6.72195	#REF!	#REF!	#REF!	#REF!	#REF!	#REF!	#REF!	#REF!	#REF!	#REF!	#REF!	#REF!
						7047.94	1409.59		204390	20123.1	224513		Herschel Island W	0.00278	0.0115	0.00271	#REF!	#REF!	#REF!	#REF!			0.140676	0.083372	22.1987	22.4228	0.0421721	0.0249934	6.65478	6.72195	#REF!	#REF!	#REF!	#REF!	#REF!	#REF!	#REF!	#REF!	#REF!	#REF!	#REF!	#REF!
						5175.26	6779.59		150083	96784.5	246867		Herschel Island W	0.00278	0.0115	0.00271	#REF!	#REF!	#REF!	#REF!			0.140676	0.083372	22.1987	22.4228	0.0421721	0.0249934	6.65478	6.72195	#REF!	#REF!	#REF!	#REF!	#REF!	#REF!	#REF!	#REF!	#REF!	#REF!	#REF!	#REF!
						643.494	-225.223		18661.3	0	18661.3		Herschel Island W	0.00278	0.0115	0.00271	#REF!	#REF!	#REF!	#REF!			0.140676	0.083372	22.1987	22.4228	0.0421721	0.0249934	6.65478	6.72195	#REF!	#REF!	#REF!	#REF!	#REF!	#REF!	#REF!	#REF!	#REF!	#REF!	#REF!	#REF!
						4336.9	2168.45		173476	32026.3	205502		Herschel Island W	0.00278	0.0115	0.00271	#REF!	#REF!	#REF!	#REF!			0.140676	0.083372	22.1987	22.4228	0.0421721	0.0249934	6.65478	6.72195	#REF!	#REF!	#REF!	#REF!	#REF!	#REF!	#REF!	#REF!	#REF!	#REF!	#REF!	#REF!
						236.551	-2069.82		9462.02	-30569.7	-21107.6		Herschel Island W	0.00278	0.0115	0.00271	#REF!	#REF!	#REF!	#REF!			0.140676	0.083372	22.1987	22.4228	0.0421721	0.0249934	6.65478	6.72195	#REF!	#REF!	#REF!	#REF!	#REF!	#REF!	#REF!	#REF!	#REF!	#REF!	#REF!	#REF!
						4905.77	40374.5		196231	596300	792531		Herschel Island W	0.00278	0.0115	0.00271	#REF!	#REF!	#REF!	#REF!			0.140676	0.083372	22.1987	22.4228	0.0421721	0.0249934	6.65478	6.72195	#REF!	#REF!	#REF!	#REF!	#REF!	#REF!	#REF!	#REF!	#REF!	#REF!	#REF!	#REF!
						1487.53	10725.1		46113.3	82875.4	128989		Herschel Island W	0.00278	0.0115	0.00271	#REF!	#REF!	#REF!	#REF!			0.140676	0.083372	22.1987	22.4228	0.0421721	0.0249934	6.65478	6.72195	#REF!	#REF!	#REF!	#REF!	#REF!	#REF!	#REF!	#REF!	#REF!	#REF!	#REF!	#REF!
						237.82	-363.864		7372.41	-2811.68	4560.73		Herschel Island W	0.00278	0.0115	0.00271	#REF!	#REF!	#REF!	#REF!			0.140676	0.083372	22.1987	22.4228	0.0421721	0.0249934	6.65478	6.72195	#REF!	#REF!	#REF!	#REF!	#REF!	#REF!	#REF!	#REF!	#REF!	#REF!	#REF!	#REF!
						465.407	5650.04		14427.6	43659.4	58087		Herschel Island W	0.00278	0.0115	0.00271	#REF!	#REF!	#REF!	#REF!			0.140676	0.083372	22.1987	22.4228	0.0421721	0.0249934	6.65478	6.72195	#REF!	#REF!	#REF!	#REF!	#REF!	#REF!	#REF!	#REF!	#REF!	#REF!	#REF!	#REF!
						88.6021	687.552		2746.67	5312.9	8059.57		Kay Point SE	0.00278	0.0115	0.00271	#REF!	#REF!	#REF!	#REF!			0.246518	0.0538971	15.9334	16.2338	0.159151	0.0347958	10.2866	10.4805	#REF!	#REF!	#REF!	#REF!	#REF!	#REF!	#REF!	#REF!	#REF!	#REF!	#REF!	#REF!
						90.6734	536.787		2810.88	4147.9	6958.77		Kay Point SE	0.00278	0.0115	0.00271	#REF!	#REF!	#REF!	#REF!			0.246518	0.0538971	15.9334	16.2338	0.159151	0.0347958	10.2866	10.4805	#REF!	#REF!	#REF!	#REF!	#REF!	#REF!	#REF!	#REF!	#REF!	#REF!	#REF!	#REF!
						523.959	586.834		16242.7	4534.63	20777.3		Kay Point SE	0.00278	0.0115	0.00271	#REF!	#REF!	#REF!	#REF!			0.246518	0.0538971	15.9334	16.2338	0.159151	0.0347958	10.2866	10.4805	#REF!	#REF!	#REF!	#REF!	#REF!	#REF!	#REF!	#REF!	#REF!	#REF!	#REF!	#REF!
						772.019	571.294		23932.6	4414.54	28347.1		Kay Point SE	0.00278	0.0115	0.00271	#REF!	#REF!	#REF!	#REF!			0.246518	0.0538971	15.9334	16.2338	0.159151	0.0347958	10.2866	10.4805	#REF!	#REF!	#REF!	#REF!	#REF!	#REF!	#REF!	#REF!	#REF!	#REF!	#REF!	#REF!
						16043.8	-60735.8		946586	-1.25365e+06	-307063		Kay Point SE	0.00278	0.0115	0.00271	#REF!	#REF!	#REF!	#REF!			0.246518	0.0538971	15.9334	16.2338	0.159151	0.0347958	10.2866	10.4805	#REF!	#REF!	#REF!	#REF!	#REF!	#REF!	#REF!	#REF!	#REF!	#REF!	#REF!	#REF!
						348.527	94.1023		20563.1	1942.37	22505.5		Kay Point SE	0.00278	0.0115	0.00271	#REF!	#REF!	#REF!	#REF!			0.246518	0.0538971	15.9334	16.2338	0.159151	0.0347958	10.2866	10.4805	#REF!	#REF!	#REF!	#REF!	#REF!	#REF!	#REF!	#REF!	#REF!	#REF!	#REF!	#REF!
						254.951	-1333.26		15042.1	-27519.8	-12477.7		Kay Point SE	0.00278	0.0115	0.00271	#REF!	#REF!	#REF!	#REF!			0.246518	0.0538971	15.9334	16.2338	0.159151	0.0347958	10.2866	10.4805	#REF!	#REF!	#REF!	#REF!	#REF!	#REF!	#REF!	#REF!	#REF!	#REF!	#REF!	#REF!
						696.082	-1078.93		41068.8	-22270.2	18798.7		Kay Point SE	0.00278	0.0115	0.00271	#REF!	#REF!	#REF!	#REF!			0.246518	0.0538971	15.9334	16.2338	0.159151	0.0347958	10.2866	10.4805	#REF!	#REF!	#REF!	#REF!	#REF!	#REF!	#REF!	#REF!	#REF!	#REF!	#REF!	#REF!
						507.224	-786.197		29926.2	-16227.9	13698.3		Kay Point SE	0.00278	0.0115	0.00271	#REF!	#REF!	#REF!	#REF!			0.246518	0.0538971	15.9334	16.2338	0.159151	0.0347958	10.2866	10.4805	#REF!	#REF!	#REF!	#REF!	#REF!	#REF!	#REF!	#REF!	#REF!	#REF!	#REF!	#REF!
						2692.81	-3446.79		123869	-54287	69582.2		Kay Point SE	0.00278	0.0115	0.00271	#REF!	#REF!	#REF!	#REF!			0.246518	0.0538971	15.9334	16.2338	0.159151	0.0347958	10.2866	10.4805	#REF!	#REF!	#REF!	#REF!	#REF!	#REF!	#REF!	#REF!	#REF!	#REF!	#REF!	#REF!
						10276.7	-8015.8		359684	0	359684		Kay Point SE	0.00278	0.0115	0.00271	#REF!	#REF!	#REF!	#REF!			0.246518	0.0538971	15.9334	16.2338	0.159151	0.0347958	10.2866	10.4805	#REF!	#REF!	#REF!	#REF!	#REF!	#REF!	#REF!	#REF!	#REF!	#REF!	#REF!	#REF!
						2804.21	-10984.1		98147.2	-117749	-19602		Kay Point SE	0.00278	0.0115	0.00271	#REF!	#REF!	#REF!	#REF!			0.246518	0.0538971	15.9334	16.2338	0.159151	0.0347958	10.2866	10.4805	#REF!	#REF!	#REF!	#REF!	#REF!	#REF!	#REF!	#REF!	#REF!	#REF!	#REF!	#REF!
						2367.2	-10532		82852	-112904	-30051.5		Kay Point SE	0.00278	0.0115	0.00271	#REF!	#REF!	#REF!	#REF!			0.246518	0.0538971	15.9334	16.2338	0.159151	0.0347958	10.2866	10.4805	#REF!	#REF!	#REF!	#REF!	#REF!	#REF!	#REF!	#REF!	#REF!	#REF!	#REF!	#REF!
						2323.5	-2044.68		81322.4	0	81322.4		Kay Point SE	0.00278	0.0115	0.00271	#REF!	#REF!	#REF!	#REF!			0.246518	0.0538971	15.9334	16.2338	0.159151	0.0347958	10.2866	10.4805	#REF!	#REF!	#REF!	#REF!	#REF!	#REF!	#REF!	#REF!	#REF!	#REF!	#REF!	#REF!
						260.693	-106.884		9124.26	0	9124.26		Kay Point SE	0.00278	0.0115	0.00271	#REF!	#REF!	#REF!	#REF!			0.246518	0.0538971	15.9334	16.2338	0.159151	0.0347958	10.2866	10.4805	#REF!	#REF!	#REF!	#REF!	#REF!	#REF!	#REF!	#REF!	#REF!	#REF!	#REF!	#REF!
						308.414	-585.986		10794.5	-6281.77	4512.71		Kay Point SE	0.00278	0.0115	0.00271	#REF!	#REF!	#REF!	#REF!			0.246518	0.0538971	15.9334	16.2338	0.159151	0.0347958	10.2866	10.4805	#REF!	#REF!	#REF!	#REF!	#REF!	#REF!	#REF!	#REF!	#REF!	#REF!	#REF!	#REF!
						741.009	-785.469		25935.3	-8420.23	17515.1		Kay Point SE	0.00278	0.0115	0.00271	#REF!	#REF!	#REF!	#REF!			0.246518	0.0538971	15.9334	16.2338	0.159151	0.0347958	10.2866	10.4805	#REF!	#REF!	#REF!	#REF!	#REF!	#REF!	#REF!	#REF!	#REF!	#REF!	#REF!	#REF!
						592.419	598.343		20734.7	6414.24	27148.9		Kay Point SE	0.00278	0.0115	0.00271	#REF!	#REF!	#REF!	#REF!			0.246518	0.0538971	15.9334	16.2338	0.159151	0.0347958	10.2866	10.4805	#REF!	#REF!	#REF!	#REF!	#REF!	#REF!	#REF!	#REF!	#REF!	#REF!	#REF!	#REF!
						767.936	-4495.64		26877.8	-48193.3	-21315.5		Kay Point SE	0.00278	0.0115	0.00271	#REF!	#REF!	#REF!	#REF!			0.246518	0.0538971	15.9334	16.2338	0.159151	0.0347958	10.2866	10.4805	#REF!	#REF!	#REF!	#REF!	#REF!	#REF!	#REF!	#REF!	#REF!	#REF!	#REF!	#REF!
						335.454	241.527		11740.9	2589.17	14330		Kay Point SE	0.00278	0.0115	0.00271	#REF!	#REF!	#REF!	#REF!			0.246518	0.0538971	15.9334	16.2338	0.159151	0.0347958	10.2866	10.4805	#REF!	#REF!	#REF!	#REF!	#REF!	#REF!	#REF!	#REF!	#REF!	#REF!	#REF!	#REF!
						241.729	-381.931		8460.51	-4094.31	4366.2		Kay Point SE	0.00278	0.0115	0.00271	#REF!	#REF!	#REF!	#REF!			0.246518	0.0538971	15.9334	16.2338	0.159151	0.0347958	10.2866	10.4805	#REF!	#REF!	#REF!	#REF!	#REF!	#REF!	#REF!	#REF!	#REF!	#REF!	#REF!	#REF!
						1036.53	-528.629		36278.4	0	36278.4		Kay Point SE	0.00278	0.0115	0.00271	#REF!	#REF!	#REF!	#REF!			0.246518	0.0538971	15.9334	16.2338	0.159151	0.0347958	10.2866	10.4805	#REF!	#REF!	#REF!	#REF!	#REF!	#REF!	#REF!	#REF!	#REF!	#REF!	#REF!	#REF!
						1177.87	-1896.37		41225.5	-20329.1	20896.4		Kay Point SE	0.00278	0.0115	0.00271	#REF!	#REF!	#REF!	#REF!			0.246518	0.0538971	15.9334	16.2338	0.159151	0.0347958	10.2866	10.4805	#REF!	#REF!	#REF!	#REF!	#REF!	#REF!	#REF!	#REF!	#REF!	#REF!	#REF!	#REF!
						751.134	-150.227		26289.7	0	26289.7		Kay Point SE	0.00278	0.0115	0.00271	#REF!	#REF!	#REF!	#REF!			0.246518	0.0538971	15.9334	16.2338	0.159151	0.0347958	10.2866	10.4805	#REF!	#REF!	#REF!	#REF!	#REF!	#REF!	#REF!	#REF!	#REF!	#REF!	#REF!	#REF!
						479.277	-747.673		16774.7	-8015.05	8759.66		Kay Point SE	0.00278	0.0115	0.00271	#REF!	#REF!	#REF!	#REF!			0.246518	0.0538971	15.9334	16.2338	0.159151	0.0347958	10.2866	10.4805	#REF!	#REF!	#REF!	#REF!	#REF!	#REF!	#REF!	#REF!	#REF!	#REF!	#REF!	#REF!
						122.234	-255.468		4278.18	-2738.62	1539.56		Kay Point SE	0.00278	0.0115	0.00271	#REF!	#REF!	#REF!	#REF!			0.246518	0.0538971	15.9334	16.2338	0.159151	0.0347958	10.2866	10.4805	#REF!	#REF!	#REF!	#REF!	#REF!	#REF!	#REF!	#REF!	#REF!	#REF!	#REF!	#REF!
						250.789	-514.117		8777.6	-5511.33	3266.27		Kay Point SE	0.00278	0.0115	0.00271	#REF!	#REF!	#REF!	#REF!			0.246518	0.0538971	15.9334	16.2338	0.159151	0.0347958	10.2866	10.4805	#REF!	#REF!	#REF!	#REF!	#REF!	#REF!	#REF!	#REF!	#REF!	#REF!	#REF!	#REF!
						222.35	148.975		7782.25	1597.01	9379.26		Kay Point SE	0.00278	0.0115	0.00271	#REF!	#REF!	#REF!	#REF!			0.246518	0.0538971	15.9334	16.2338	0.159151	0.0347958	10.2866	10.4805	#REF!	#REF!	#REF!	#REF!	#REF!	#REF!	#REF!	#REF!	#REF!	#REF!	#REF!	#REF!
						663.795	-1874.09		23232.8	-20090.3	3142.58		Kay Point SE	0.00278	0.0115	0.00271	#REF!	#REF!	#REF!	#REF!			0.246518	0.0538971	15.9334	16.2338	0.159151	0.0347958	10.2866	10.4805	#REF!	#REF!	#REF!	#REF!	#REF!	#REF!	#REF!	#REF!	#REF!	#REF!	#REF!	#REF!
						848.372	-2972.47		29693	-31864.8	-2171.81		Kay Point SE	0.00278	0.0115	0.00271	#REF!	#REF!	#REF!	#REF!			0.246518	0.0538971	15.9334	16.2338	0.159151	0.0347958	10.2866	10.4805	#REF!	#REF!	#REF!	#REF!	#REF!	#REF!	#REF!	#REF!	#REF!	#REF!	#REF!	#REF!
						783.748	619.161		27431.2	6637.4	34068.6		Kay Point SE	0.00278	0.0115	0.00271	#REF!	#REF!	#REF!	#REF!			0.246518	0.0538971	15.9334	16.2338	0.159151	0.0347958	10.2866	10.4805	#REF!	#REF!	#REF!	#REF!	#REF!	#REF!	#REF!	#REF!	#REF!	#REF!	#REF!	#REF!
						933.403	420.031		32669.1	4502.74	37171.8		Kay Point SE	0.00278	0.0115	0.00271	#REF!	#REF!	#REF!	#REF!			0.246518	0.0538971	15.9334	16.2338	0.159151	0.0347958	10.2866	10.4805	#REF!	#REF!	#REF!	#REF!	#REF!	#REF!	#REF!	#REF!	#REF!	#REF!	#REF!	#REF!
						846.973	-1891.01		29644.1	-20271.6	9372.43		Kay Point SE	0.00278	0.0115	0.00271	#REF!	#REF!	#REF!	#REF!			0.246518	0.0538971	15.9334	16.2338	0.159151	0.0347958	10.2866	10.4805	#REF!	#REF!	#REF!	#REF!	#REF!	#REF!	#REF!	#REF!	#REF!	#REF!	#REF!	#REF!
						533.61	-1237.98		18676.3	-13271.1	5405.26		Kay Point SE	0.00278	0.0115	0.00271	#REF!	#REF!	#REF!	#REF!			0.246518	0.0538971	15.9334	16.2338	0.159151	0.0347958	10.2866	10.4805	#REF!	#REF!	#REF!	#REF!	#REF!	#REF!	#REF!	#REF!	#REF!	#REF!	#REF!	#REF!
						1566.72	360.344		54835	3862.89	58697.9		Kay Point SE	0.00278	0.0115	0.00271	#REF!	#REF!	#REF!	#REF!			0.246518	0.0538971	15.9334	16.2338	0.159151	0.0347958	10.2866	10.4805	#REF!	#REF!	#REF!	#REF!	#REF!	#REF!	#REF!	#REF!	#REF!	#REF!	#REF!	#REF!
						617.818	599.283		21623.6	6424.32	28047.9		Kay Point SE	0.00278	0.0115	0.00271	#REF!	#REF!	#REF!	#REF!			0.246518	0.0538971	15.9334	16.2338	0.159151	0.0347958	10.2866	10.4805	#REF!	#REF!	#REF!	#REF!	#REF!	#REF!	#REF!	#REF!	#REF!	#REF!	#REF!	#REF!
						1274.74	-764.846		44616	0	44616		Kay Point SE	0.00278	0.0115	0.00271	#REF!	#REF!	#REF!	#REF!			0.246518	0.0538971	15.9334	16.2338	0.159151	0.0347958	10.2866	10.4805	#REF!	#REF!	#REF!	#REF!	#REF!	#REF!	#REF!	#REF!	#REF!	#REF!	#REF!	#REF!
						346.978	-912.551		12144.2	-9782.55	2361.67		Kay Point SE	0.00278	0.0115	0.00271	#REF!	#REF!	#REF!	#REF!			0.246518	0.0538971	15.9334	16.2338	0.159151	0.0347958	10.2866	10.4805	#REF!	#REF!	#REF!	#REF!	#REF!	#REF!	#REF!	#REF!	#REF!	#REF!	#REF!	#REF!
						223.808	-570.71		7833.28	-6118.02	1715.26		Kay Point SE	0.00278	0.0115	0.00271	#REF!	#REF!	#REF!	#REF!			0.246518	0.0538971	15.9334	16.2338	0.159151	0.0347958	10.2866	10.4805	#REF!	#REF!	#REF!	#REF!	#REF!	#REF!	#REF!	#REF!	#REF!	#REF!	#REF!	#REF!
						330.413	-1315.04		11564.4	-14097.3	-2532.81		Kay Point SE	0.00278	0.0115	0.00271	#REF!	#REF!	#REF!	#REF!			0.246518	0.0538971	15.9334	16.2338	0.159151	0.0347958	10.2866	10.4805	#REF!	#REF!	#REF!	#REF!	#REF!	#REF!	#REF!	#REF!	#REF!	#REF!	#REF!	#REF!
						111.942	1348.9		3917.96	14460.2	18378.1		Kay Point SE	0.00278	0.0115	0.00271	#REF!	#REF!	#REF!	#REF!			0.246518	0.0538971	15.9334	16.2338	0.159151	0.0347958	10.2866	10.4805	#REF!	#REF!	#REF!	#REF!	#REF!	#REF!	#REF!	#REF!	#REF!	#REF!	#REF!	#REF!
						319.674	783.202		14705	17654.7	32359.7		Kay Point SE	0.00278	0.0115	0.00271	#REF!	#REF!	#REF!	#REF!			0.246518	0.0538971	15.9334	16.2338	0.159151	0.0347958	10.2866	10.4805	#REF!	#REF!	#REF!	#REF!	#REF!	#REF!	#REF!	#REF!	#REF!	#REF!	#REF!	#REF!
						168.035	-176.437		7729.6	-3977.17	3752.43		Kay Point SE	0.00278	0.0115	0.00271	#REF!	#REF!	#REF!	#REF!			0.246518	0.0538971	15.9334	16.2338	0.159151	0.0347958	10.2866	10.4805	#REF!	#REF!	#REF!	#REF!	#REF!	#REF!	#REF!	#REF!	#REF!	#REF!	#REF!	#REF!
						968.243	29.0473		45507.4	464.757	45972.2		Kay Point SE	0.00278	0.0115	0.00271	#REF!	#REF!	#REF!	#REF!			0.246518	0.0538971	15.9334	16.2338	0.159151	0.0347958	10.2866	10.4805	#REF!	#REF!	#REF!	#REF!	#REF!	#REF!	#REF!	#REF!	#REF!	#REF!	#REF!	#REF!
						7418.76	-5786.63		222563	0	222563		Kay Point SE	0.00278	0.0115	0.00271	#REF!	#REF!	#REF!	#REF!			0.246518	0.0538971	15.9334	16.2338	0.159151	0.0347958	10.2866	10.4805	#REF!	#REF!	#REF!	#REF!	#REF!	#REF!	#REF!	#REF!	#REF!	#REF!	#REF!	#REF!
						9548.74	58342.8		525181	916512	1.44169e+06		Kay Point SE	0.00278	0.0115	0.00271	#REF!	#REF!	#REF!	#REF!			0.246518	0.0538971	15.9334	16.2338	0.159151	0.0347958	10.2866	10.4805	#REF!	#REF!	#REF!	#REF!	#REF!	#REF!	#REF!	#REF!	#REF!	#REF!	#REF!	#REF!
						402.647	-539.547		22145.6	-8475.79	13669.8		Kay Point SE	0.00278	0.0115	0.00271	#REF!	#REF!	#REF!	#REF!			0.246518	0.0538971	15.9334	16.2338	0.159151	0.0347958	10.2866	10.4805	#REF!	#REF!	#REF!	#REF!	#REF!	#REF!	#REF!	#REF!	#REF!	#REF!	#REF!	#REF!
						320.643	-808.02		17635.4	-12693.3	4942.1		Kay Point SE	0.00278	0.0115	0.00271	#REF!	#REF!	#REF!	#REF!			0.246518	0.0538971	15.9334	16.2338	0.159151	0.0347958	10.2866	10.4805	#REF!	#REF!	#REF!	#REF!	#REF!	#REF!	#REF!	#REF!	#REF!	#REF!	#REF!	#REF!
						509.914	1081.02		17337.1	12296.6	29633.7		Kay Point SE	0.00278	0.0115	0.00271	#REF!	#REF!	#REF!	#REF!			0.246518	0.0538971	15.9334	16.2338	0.159151	0.0347958	10.2866	10.4805	#REF!	#REF!	#REF!	#REF!	#REF!	#REF!	#REF!	#REF!	#REF!	#REF!	#REF!	#REF!
						1659.87	2589.4		56435.7	29454.5	85890.2		Kay Point SE	0.00278	0.0115	0.00271	#REF!	#REF!	#REF!	#REF!			0.246518	0.0538971	15.9334	16.2338	0.159151	0.0347958	10.2866	10.4805	#REF!	#REF!	#REF!	#REF!	#REF!	#REF!	#REF!	#REF!	#REF!	#REF!	#REF!	#REF!
						325.219	-302.454		9756.57	0	9756.57		Kay Point SE	0.00278	0.0115	0.00271	#REF!	#REF!	#REF!	#REF!			0.246518	0.0538971	15.9334	16.2338	0.159151	0.0347958	10.2866	10.4805	#REF!	#REF!	#REF!	#REF!	#REF!	#REF!	#REF!	#REF!	#REF!	#REF!	#REF!	#REF!
						1415.38	1755.07		42461.3	16212	58673.3		Kay Point SE	0.00278	0.0115	0.00271	#REF!	#REF!	#REF!	#REF!			0.246518	0.0538971	15.9334	16.2338	0.159151	0.0347958	10.2866	10.4805	#REF!	#REF!	#REF!	#REF!	#REF!	#REF!	#REF!	#REF!	#REF!	#REF!	#REF!	#REF!
						231.335	-923.027		6708.72	-13177	-6468.29		Kay Point SE	0.00278	0.0115	0.00271	#REF!	#REF!	#REF!	#REF!			0.246518	0.0538971	15.9334	16.2338	0.159151	0.0347958	10.2866	10.4805	#REF!	#REF!	#REF!	#REF!	#REF!	#REF!	#REF!	#REF!	#REF!	#REF!	#REF!	#REF!
						303.265	2359.4		10614.3	25292.8	35907.1		Kay Point SE	0.00278	0.0115	0.00271	#REF!	#REF!	#REF!	#REF!			0.246518	0.0538971	15.9334	16.2338	0.159151	0.0347958	10.2866	10.4805	#REF!	#REF!	#REF!	#REF!	#REF!	#REF!	#REF!	#REF!	#REF!	#REF!	#REF!	#REF!
						532.437	-330.111		18635.3	0	18635.3		Kay Point SE	0.00278	0.0115	0.00271	#REF!	#REF!	#REF!	#REF!			0.246518	0.0538971	15.9334	16.2338	0.159151	0.0347958	10.2866	10.4805	#REF!	#REF!	#REF!	#REF!	#REF!	#REF!	#REF!	#REF!	#REF!	#REF!	#REF!	#REF!
						785.807	8643.88		24360	66793.6	91153.7		Kay Point SE	0.00278	0.0115	0.00271	#REF!	#REF!	#REF!	#REF!			0.246518	0.0538971	15.9334	16.2338	0.159151	0.0347958	10.2866	10.4805	#REF!	#REF!	#REF!	#REF!	#REF!	#REF!	#REF!	#REF!	#REF!	#REF!	#REF!	#REF!
						625.752	6883.28		19398.3	53189	72587.3		Kay Point SE	0.00278	0.0115	0.00271	#REF!	#REF!	#REF!	#REF!			0.246518	0.0538971	15.9334	16.2338	0.159151	0.0347958	10.2866	10.4805	#REF!	#REF!	#REF!	#REF!	#REF!	#REF!	#REF!	#REF!	#REF!	#REF!	#REF!	#REF!
						566.616	-895.253		13598.8	-22125.5	-8526.76		Kay Point SE	0.00278	0.0115	0.00271	#REF!	#REF!	#REF!	#REF!			0.246518	0.0538971	15.9334	16.2338	0.159151	0.0347958	10.2866	10.4805	#REF!	#REF!	#REF!	#REF!	#REF!	#REF!	#REF!	#REF!	#REF!	#REF!	#REF!	#REF!
						1123.23	157.252		61777.7	2470.29	64248		Kay Point SE	0.00278	0.0115	0.00271	#REF!	#REF!	#REF!	#REF!			0.246518	0.0538971	15.9334	16.2338	0.159151	0.0347958	10.2866	10.4805	#REF!	#REF!	#REF!	#REF!	#REF!	#REF!	#REF!	#REF!	#REF!	#REF!	#REF!	#REF!
						4164.09	1707.28		141579	19420.3	160999		Kay Point SE	0.00278	0.0115	0.00271	#REF!	#REF!	#REF!	#REF!			0.246518	0.0538971	15.9334	16.2338	0.159151	0.0347958	10.2866	10.4805	#REF!	#REF!	#REF!	#REF!	#REF!	#REF!	#REF!	#REF!	#REF!	#REF!	#REF!	#REF!
						197.674	-268.836		7116.25	-2527.06	4589.19		Kay Point SE	0.00278	0.0115	0.00271	#REF!	#REF!	#REF!	#REF!			0.246518	0.0538971	15.9334	16.2338	0.159151	0.0347958	10.2866	10.4805	#REF!	#REF!	#REF!	#REF!	#REF!	#REF!	#REF!	#REF!	#REF!	#REF!	#REF!	#REF!
						131.468	-206.405		3812.57	-2946.6	865.965		Kay Point SE	0.00278	0.0115	0.00271	#REF!	#REF!	#REF!	#REF!			0.246518	0.0538971	15.9334	16.2338	0.159151	0.0347958	10.2866	10.4805	#REF!	#REF!	#REF!	#REF!	#REF!	#REF!	#REF!	#REF!	#REF!	#REF!	#REF!	#REF!
						192.605	-442.992		14060.2	-8290.27	5769.9		Kay Point SE	0.00278	0.0115	0.00271	#REF!	#REF!	#REF!	#REF!			0.246518	0.0538971	15.9334	16.2338	0.159151	0.0347958	10.2866	10.4805	#REF!	#REF!	#REF!	#REF!	#REF!	#REF!	#REF!	#REF!	#REF!	#REF!	#REF!	#REF!
						45.735	-86.8964		3338.65	-1626.2	1712.45		Kay Point SE	0.00278	0.0115	0.00271	#REF!	#REF!	#REF!	#REF!			0.246518	0.0538971	15.9334	16.2338	0.159151	0.0347958	10.2866	10.4805	#REF!	#REF!	#REF!	#REF!	#REF!	#REF!	#REF!	#REF!	#REF!	#REF!	#REF!	#REF!
						408.03	248.898		22441.6	3909.96	26351.6		Kay Point SE	0.00278	0.0115	0.00271	#REF!	#REF!	#REF!	#REF!			0.246518	0.0538971	15.9334	16.2338	0.159151	0.0347958	10.2866	10.4805	#REF!	#REF!	#REF!	#REF!	#REF!	#REF!	#REF!	#REF!	#REF!	#REF!	#REF!	#REF!
						1062.3	-488.656		58426.3	0	58426.3		Kay Point SE	0.00278	0.0115	0.00271	#REF!	#REF!	#REF!	#REF!			0.246518	0.0538971	15.9334	16.2338	0.159151	0.0347958	10.2866	10.4805	#REF!	#REF!	#REF!	#REF!	#REF!	#REF!	#REF!	#REF!	#REF!	#REF!	#REF!	#REF!
						5496.48	8134.78		164894	75143.3	240038		Kay Point SE	0.00278	0.0115	0.00271	#REF!	#REF!	#REF!	#REF!			0.246518	0.0538971	15.9334	16.2338	0.159151	0.0347958	10.2866	10.4805	#REF!	#REF!	#REF!	#REF!	#REF!	#REF!	#REF!	#REF!	#REF!	#REF!	#REF!	#REF!
						678.366	-2672.82		20351	-24689.6	-4338.65		Kay Point SE	0.00278	0.0115	0.00271	#REF!	#REF!	#REF!	#REF!			0.246518	0.0538971	15.9334	16.2338	0.159151	0.0347958	10.2866	10.4805	#REF!	#REF!	#REF!	#REF!	#REF!	#REF!	#REF!	#REF!	#REF!	#REF!	#REF!	#REF!
						2057.89	-5051.93		61736.7	-46666.1	15070.6		Kay Point SE	0.00278	0.0115	0.00271	#REF!	#REF!	#REF!	#REF!			0.246518	0.0538971	15.9334	16.2338	0.159151	0.0347958	10.2866	10.4805	#REF!	#REF!	#REF!	#REF!	#REF!	#REF!	#REF!	#REF!	#REF!	#REF!	#REF!	#REF!
						170.068	147.959		6122.45	1390.82	7513.26		Kay Point SE	0.00278	0.0115	0.00271	#REF!	#REF!	#REF!	#REF!			0.246518	0.0538971	15.9334	16.2338	0.159151	0.0347958	10.2866	10.4805	#REF!	#REF!	#REF!	#REF!	#REF!	#REF!	#REF!	#REF!	#REF!	#REF!	#REF!	#REF!
						420.794	1152.98		14307	13115.1	27422.1		Kay Point SE	0.00278	0.0115	0.00271	#REF!	#REF!	#REF!	#REF!			0.246518	0.0538971	15.9334	16.2338	0.159151	0.0347958	10.2866	10.4805	#REF!	#REF!	#REF!	#REF!	#REF!	#REF!	#REF!	#REF!	#REF!	#REF!	#REF!	#REF!
						1785.85	4268.17		60718.7	48550.4	109269		Kay Point SE	0.00278	0.0115	0.00271	#REF!	#REF!	#REF!	#REF!			0.246518	0.0538971	15.9334	16.2338	0.159151	0.0347958	10.2866	10.4805	#REF!	#REF!	#REF!	#REF!	#REF!	#REF!	#REF!	#REF!	#REF!	#REF!	#REF!	#REF!
						1111.8	-2624.68		31130.3	-41994.9	-10864.6		Kay Point SE	0.00278	0.0115	0.00271	#REF!	#REF!	#REF!	#REF!			0.246518	0.0538971	15.9334	16.2338	0.159151	0.0347958	10.2866	10.4805	#REF!	#REF!	#REF!	#REF!	#REF!	#REF!	#REF!	#REF!	#REF!	#REF!	#REF!	#REF!
						6432.11	-20157.7		186531	-287768	-101237		Kay Point SE	0.00278	0.0115	0.00271	#REF!	#REF!	#REF!	#REF!			0.246518	0.0538971	15.9334	16.2338	0.159151	0.0347958	10.2866	10.4805	#REF!	#REF!	#REF!	#REF!	#REF!	#REF!	#REF!	#REF!	#REF!	#REF!	#REF!	#REF!
						13720.6	42259.5		548825	624141	1.17297e+06		King Point NW	0.00278	0.0115	0.00271	#REF!	#REF!	#REF!	#REF!			0.184888	0.101057	18.8904	19.1764	0	0	0	0	#REF!	#REF!	#REF!	#REF!	#REF!	#REF!	#REF!	#REF!	#REF!	#REF!	#REF!	#REF!
						11012	-14099.5		506551	-222067	284484		King Point NW	0.00278	0.0115	0.00271	#REF!	#REF!	#REF!	#REF!			0.184888	0.101057	18.8904	19.1764	0	0	0	0	#REF!	#REF!	#REF!	#REF!	#REF!	#REF!	#REF!	#REF!	#REF!	#REF!	#REF!	#REF!
						593.535	-569.794		24928.5	0	24928.5		King Point NW	0.00278	0.0115	0.00271	#REF!	#REF!	#REF!	#REF!			0.184888	0.101057	18.8904	19.1764	0	0	0	0	#REF!	#REF!	#REF!	#REF!	#REF!	#REF!	#REF!	#REF!	#REF!	#REF!	#REF!	#REF!
						332.109	-587.832		18266	-11332.1	6933.87		King Point NW	0.00278	0.0115	0.00271	#REF!	#REF!	#REF!	#REF!			0.184888	0.101057	18.8904	19.1764	0	0	0	0	#REF!	#REF!	#REF!	#REF!	#REF!	#REF!	#REF!	#REF!	#REF!	#REF!	#REF!	#REF!
						339.03	-600.082		18646.6	-11568.3	7078.37		King Point NW	0.00278	0.0115	0.00271	#REF!	#REF!	#REF!	#REF!			0.184888	0.101057	18.8904	19.1764	0	0	0	0	#REF!	#REF!	#REF!	#REF!	#REF!	#REF!	#REF!	#REF!	#REF!	#REF!	#REF!	#REF!
						1650.9	-2047.12		90799.6	-39463.9	51335.7		King Point NW	0.00278	0.0115	0.00271	#REF!	#REF!	#REF!	#REF!			0.184888	0.101057	18.8904	19.1764	0	0	0	0	#REF!	#REF!	#REF!	#REF!	#REF!	#REF!	#REF!	#REF!	#REF!	#REF!	#REF!	#REF!
						780.467	156.093		42925.7	3009.13	45934.8		King Point SE	0.00278	0.0115	0.00271	#REF!	#REF!	#REF!	#REF!			0.821726	0.360016	14.4429	15.6246	0.0592153	0.0259435	1.04078	1.12594	#REF!	#REF!	#REF!	#REF!	#REF!	#REF!	#REF!	#REF!	#REF!	#REF!	#REF!	#REF!
						33428.1	162126		1.13656e+06	1.84419e+06	2.98074e+06		King Point SE	0.00278	0.0115	0.00271	#REF!	#REF!	#REF!	#REF!			0.821726	0.360016	14.4429	15.6246	0.0592153	0.0259435	1.04078	1.12594	#REF!	#REF!	#REF!	#REF!	#REF!	#REF!	#REF!	#REF!	#REF!	#REF!	#REF!	#REF!
						448.946	-269.367		16162	0	16162		King Point SE	0.00278	0.0115	0.00271	#REF!	#REF!	#REF!	#REF!			0.821726	0.360016	14.4429	15.6246	0.0592153	0.0259435	1.04078	1.12594	#REF!	#REF!	#REF!	#REF!	#REF!	#REF!	#REF!	#REF!	#REF!	#REF!	#REF!	#REF!
						4686.74	-13298		135915	-189840	-53924.9		King Point SE	0.00278	0.0115	0.00271	#REF!	#REF!	#REF!	#REF!			0.821726	0.360016	14.4429	15.6246	0.0592153	0.0259435	1.04078	1.12594	#REF!	#REF!	#REF!	#REF!	#REF!	#REF!	#REF!	#REF!	#REF!	#REF!	#REF!	#REF!
						11983.3	-15916.8		215700	-127334	88365.4		King Point SE	0.00278	0.0115	0.00271	#REF!	#REF!	#REF!	#REF!			0.821726	0.360016	14.4429	15.6246	0.0592153	0.0259435	1.04078	1.12594	#REF!	#REF!	#REF!	#REF!	#REF!	#REF!	#REF!	#REF!	#REF!	#REF!	#REF!	#REF!
						6351.33	1587.83		177837	25405.3	203243		King Point SE	0.00278	0.0115	0.00271	#REF!	#REF!	#REF!	#REF!			0.821726	0.360016	14.4429	15.6246	0.0592153	0.0259435	1.04078	1.12594	#REF!	#REF!	#REF!	#REF!	#REF!	#REF!	#REF!	#REF!	#REF!	#REF!	#REF!	#REF!
						1314.55	-2272.16		36807.4	-36354.5	452.861		King Point SE	0.00278	0.0115	0.00271	#REF!	#REF!	#REF!	#REF!			0.821726	0.360016	14.4429	15.6246	0.0592153	0.0259435	1.04078	1.12594	#REF!	#REF!	#REF!	#REF!	#REF!	#REF!	#REF!	#REF!	#REF!	#REF!	#REF!	#REF!
						613.494	1171.77		17791.3	16728.1	34519.4		King Point SE	0.00278	0.0115	0.00271	#REF!	#REF!	#REF!	#REF!			0.821726	0.360016	14.4429	15.6246	0.0592153	0.0259435	1.04078	1.12594	#REF!	#REF!	#REF!	#REF!	#REF!	#REF!	#REF!	#REF!	#REF!	#REF!	#REF!	#REF!
						3727.7	-13101.2		108103	-187031	-78927.2		King Point SE	0.00278	0.0115	0.00271	#REF!	#REF!	#REF!	#REF!			0.821726	0.360016	14.4429	15.6246	0.0592153	0.0259435	1.04078	1.12594	#REF!	#REF!	#REF!	#REF!	#REF!	#REF!	#REF!	#REF!	#REF!	#REF!	#REF!	#REF!
						1589.1	-1795.69		57207.8	-16879.5	40328.3		King Point SE	0.00278	0.0115	0.00271	#REF!	#REF!	#REF!	#REF!			0.821726	0.360016	14.4429	15.6246	0.0592153	0.0259435	1.04078	1.12594	#REF!	#REF!	#REF!	#REF!	#REF!	#REF!	#REF!	#REF!	#REF!	#REF!	#REF!	#REF!
						1662.6	-1180.45		59853.7	0	59853.7		King Point SE	0.00278	0.0115	0.00271	#REF!	#REF!	#REF!	#REF!			0.821726	0.360016	14.4429	15.6246	0.0592153	0.0259435	1.04078	1.12594	#REF!	#REF!	#REF!	#REF!	#REF!	#REF!	#REF!	#REF!	#REF!	#REF!	#REF!	#REF!
						1332.76	-946.259		47979.3	0	47979.3		King Point SE	0.00278	0.0115	0.00271	#REF!	#REF!	#REF!	#REF!			0.821726	0.360016	14.4429	15.6246	0.0592153	0.0259435	1.04078	1.12594	#REF!	#REF!	#REF!	#REF!	#REF!	#REF!	#REF!	#REF!	#REF!	#REF!	#REF!	#REF!
						161.243	90.2962		5804.76	848.784	6653.54		Phillips Bay	0.00278	0.0115	0.00271	#REF!	#REF!	#REF!	#REF!			0.430994	0	22.2881	22.7191	0.0249069	0	1.28802	1.31293	#REF!	#REF!	#REF!	#REF!	#REF!	#REF!	#REF!	#REF!	#REF!	#REF!	#REF!	#REF!
						72.8271	10.9241		2621.78	102.686	2724.46		Phillips Bay	0.00278	0.0115	0.00271	#REF!	#REF!	#REF!	#REF!			0.430994	0	22.2881	22.7191	0.0249069	0	1.28802	1.31293	#REF!	#REF!	#REF!	#REF!	#REF!	#REF!	#REF!	#REF!	#REF!	#REF!	#REF!	#REF!
						955.555	-1462		34400	-13742.8	20657.2		Phillips Bay	0.00278	0.0115	0.00271	#REF!	#REF!	#REF!	#REF!			0.430994	0	22.2881	22.7191	0.0249069	0	1.28802	1.31293	#REF!	#REF!	#REF!	#REF!	#REF!	#REF!	#REF!	#REF!	#REF!	#REF!	#REF!	#REF!
						571.381	2331.24		19427	26517.8	45944.8		Phillips Bay	0.00278	0.0115	0.00271	#REF!	#REF!	#REF!	#REF!			0.430994	0	22.2881	22.7191	0.0249069	0	1.28802	1.31293	#REF!	#REF!	#REF!	#REF!	#REF!	#REF!	#REF!	#REF!	#REF!	#REF!	#REF!	#REF!
						3392.45	-441.018		101773	0	101773		Phillips Bay	0.00278	0.0115	0.00271	#REF!	#REF!	#REF!	#REF!			0.430994	0	22.2881	22.7191	0.0249069	0	1.28802	1.31293	#REF!	#REF!	#REF!	#REF!	#REF!	#REF!	#REF!	#REF!	#REF!	#REF!	#REF!	#REF!
						9616.62	35773.8		288499	330453	618952		Phillips Bay NW	0.00278	0.0115	0.00271	#REF!	#REF!	#REF!	#REF!			0.616295	0.170544	19.7043	20.4911	0	0	0	0	#REF!	#REF!	#REF!	#REF!	#REF!	#REF!	#REF!	#REF!	#REF!	#REF!	#REF!	#REF!
						1031.63	-1743.45		30948.8	-16104.7	14844.1		Phillips Bay NW	0.00278	0.0115	0.00271	#REF!	#REF!	#REF!	#REF!			0.616295	0.170544	19.7043	20.4911	0	0	0	0	#REF!	#REF!	#REF!	#REF!	#REF!	#REF!	#REF!	#REF!	#REF!	#REF!	#REF!	#REF!
						4447.76	2579.7		133433	23829.4	157262		Phillips Bay NW	0.00278	0.0115	0.00271	#REF!	#REF!	#REF!	#REF!			0.616295	0.170544	19.7043	20.4911	0	0	0	0	#REF!	#REF!	#REF!	#REF!	#REF!	#REF!	#REF!	#REF!	#REF!	#REF!	#REF!	#REF!
						3361.15	-3125.87		100835	0	100835		Phillips Bay NW	0.00278	0.0115	0.00271	#REF!	#REF!	#REF!	#REF!			0.616295	0.170544	19.7043	20.4911	0	0	0	0	#REF!	#REF!	#REF!	#REF!	#REF!	#REF!	#REF!	#REF!	#REF!	#REF!	#REF!	#REF!
						10687	50442.7		587786	792410	1.3802e+06		Phillips Bay NW	0.00278	0.0115	0.00271	#REF!	#REF!	#REF!	#REF!			0.616295	0.170544	19.7043	20.4911	0	0	0	0	#REF!	#REF!	#REF!	#REF!	#REF!	#REF!	#REF!	#REF!	#REF!	#REF!	#REF!	#REF!
						3009.8	-7450.41		165539	-117039	48499.9		Phillips Bay NW	0.00278	0.0115	0.00271	#REF!	#REF!	#REF!	#REF!			0.616295	0.170544	19.7043	20.4911	0	0	0	0	#REF!	#REF!	#REF!	#REF!	#REF!	#REF!	#REF!	#REF!	#REF!	#REF!	#REF!	#REF!
						5370.1	-13293		295355	-208822	86533.6		Phillips Bay NW	0.00278	0.0115	0.00271	#REF!	#REF!	#REF!	#REF!			0.616295	0.170544	19.7043	20.4911	0	0	0	0	#REF!	#REF!	#REF!	#REF!	#REF!	#REF!	#REF!	#REF!	#REF!	#REF!	#REF!	#REF!
						560.454	-711.777		20176.3	-6690.7	13485.6		Roland Bay E	0.00278	0.0115	0.00271	#REF!	#REF!	#REF!	#REF!			0.186764	0	27.6414	27.8282	0.00218164	0	0.322887	0.325069	#REF!	#REF!	#REF!	#REF!	#REF!	#REF!	#REF!	#REF!	#REF!	#REF!	#REF!	#REF!
						1323.18	-2980.2		47634.4	-28013.9	19620.5		Roland Bay E	0.00278	0.0115	0.00271	#REF!	#REF!	#REF!	#REF!			0.186764	0	27.6414	27.8282	0.00218164	0	0.322887	0.325069	#REF!	#REF!	#REF!	#REF!	#REF!	#REF!	#REF!	#REF!	#REF!	#REF!	#REF!	#REF!
						1013.02	141.823		36468.7	1333.13	37801.9		Roland Bay E	0.00278	0.0115	0.00271	#REF!	#REF!	#REF!	#REF!			0.186764	0	27.6414	27.8282	0.00218164	0	0.322887	0.325069	#REF!	#REF!	#REF!	#REF!	#REF!	#REF!	#REF!	#REF!	#REF!	#REF!	#REF!	#REF!
						1738.71	1495.29		62593.5	14055.7	76649.2		Roland Bay E	0.00278	0.0115	0.00271	#REF!	#REF!	#REF!	#REF!			0.186764	0	27.6414	27.8282	0.00218164	0	0.322887	0.325069	#REF!	#REF!	#REF!	#REF!	#REF!	#REF!	#REF!	#REF!	#REF!	#REF!	#REF!	#REF!
						843.524	-438.632		30366.9	0	30366.9		Roland Bay W	0.00278	0.0115	0.00271	#REF!	#REF!	#REF!	#REF!			0.389239	0.0715082	21.1074	21.5681	0.00246636	0.000453102	0.133744	0.136664	#REF!	#REF!	#REF!	#REF!	#REF!	#REF!	#REF!	#REF!	#REF!	#REF!	#REF!	#REF!
						940.597	564.358		33861.5	5304.96	39166.4		Roland Bay W	0.00278	0.0115	0.00271	#REF!	#REF!	#REF!	#REF!			0.389239	0.0715082	21.1074	21.5681	0.00246636	0.000453102	0.133744	0.136664	#REF!	#REF!	#REF!	#REF!	#REF!	#REF!	#REF!	#REF!	#REF!	#REF!	#REF!	#REF!
						1009.1	1745.74		36327.6	16410	52737.6		Roland Bay W	0.00278	0.0115	0.00271	#REF!	#REF!	#REF!	#REF!			0.389239	0.0715082	21.1074	21.5681	0.00246636	0.000453102	0.133744	0.136664	#REF!	#REF!	#REF!	#REF!	#REF!	#REF!	#REF!	#REF!	#REF!	#REF!	#REF!	#REF!
						176.015	-244.66		6336.53	-2299.81	4036.72		Roland Bay W	0.00278	0.0115	0.00271	#REF!	#REF!	#REF!	#REF!			0.389239	0.0715082	21.1074	21.5681	0.00246636	0.000453102	0.133744	0.136664	#REF!	#REF!	#REF!	#REF!	#REF!	#REF!	#REF!	#REF!	#REF!	#REF!	#REF!	#REF!
						2486.27	-149.176		89505.8	0	89505.8		Roland Bay W	0.00278	0.0115	0.00271	#REF!	#REF!	#REF!	#REF!			0.389239	0.0715082	21.1074	21.5681	0.00246636	0.000453102	0.133744	0.136664	#REF!	#REF!	#REF!	#REF!	#REF!	#REF!	#REF!	#REF!	#REF!	#REF!	#REF!	#REF!
						2234.56	-916.168		80444	0	80444		Roland Bay W	0.00278	0.0115	0.00271	#REF!	#REF!	#REF!	#REF!			0.389239	0.0715082	21.1074	21.5681	0.00246636	0.000453102	0.133744	0.136664	#REF!	#REF!	#REF!	#REF!	#REF!	#REF!	#REF!	#REF!	#REF!	#REF!	#REF!	#REF!
						4414.37	1854.04		158917	17427.9	176345		Roland Bay W	0.00278	0.0115	0.00271	#REF!	#REF!	#REF!	#REF!			0.389239	0.0715082	21.1074	21.5681	0.00246636	0.000453102	0.133744	0.136664	#REF!	#REF!	#REF!	#REF!	#REF!	#REF!	#REF!	#REF!	#REF!	#REF!	#REF!	#REF!
						3244.01	5417.49		116784	50924.4	167709		Roland Bay W	0.00278	0.0115	0.00271	#REF!	#REF!	#REF!	#REF!			0.389239	0.0715082	21.1074	21.5681	0.00246636	0.000453102	0.133744	0.136664	#REF!	#REF!	#REF!	#REF!	#REF!	#REF!	#REF!	#REF!	#REF!	#REF!	#REF!	#REF!
						348.51	-324.115		10455.3	0	10455.3		Roland Bay W	0.00278	0.0115	0.00271	#REF!	#REF!	#REF!	#REF!			0.389239	0.0715082	21.1074	21.5681	0.00246636	0.000453102	0.133744	0.136664	#REF!	#REF!	#REF!	#REF!	#REF!	#REF!	#REF!	#REF!	#REF!	#REF!	#REF!	#REF!
						408.305	-44.9136		12249.2	0	12249.2		Roland Bay W	0.00278	0.0115	0.00271	#REF!	#REF!	#REF!	#REF!			0.389239	0.0715082	21.1074	21.5681	0.00246636	0.000453102	0.133744	0.136664	#REF!	#REF!	#REF!	#REF!	#REF!	#REF!	#REF!	#REF!	#REF!	#REF!	#REF!	#REF!
						13832.1	-18372.4		248977	-146979	101998		Sabine Point	0.00278	0.0115	0.00271	#REF!	#REF!	#REF!	#REF!			0.100483	0.171544	22.2941	22.5661	0.00512896	0.00875617	1.13796	1.15185	#REF!	#REF!	#REF!	#REF!	#REF!	#REF!	#REF!	#REF!	#REF!	#REF!	#REF!	#REF!
						145.672	597.255		4952.85	6793.78	11746.6		Sabine Point	0.00278	0.0115	0.00271	#REF!	#REF!	#REF!	#REF!			0.100483	0.171544	22.2941	22.5661	0.00512896	0.00875617	1.13796	1.15185	#REF!	#REF!	#REF!	#REF!	#REF!	#REF!	#REF!	#REF!	#REF!	#REF!	#REF!	#REF!
						541.555	-541.555		22745.3	-10289.6	12455.8		Sabine Point	0.00278	0.0115	0.00271	#REF!	#REF!	#REF!	#REF!			0.100483	0.171544	22.2941	22.5661	0.00512896	0.00875617	1.13796	1.15185	#REF!	#REF!	#REF!	#REF!	#REF!	#REF!	#REF!	#REF!	#REF!	#REF!	#REF!	#REF!
						1665.09	2347.77		59943.1	22069	82012.1		Sabine Point	0.00278	0.0115	0.00271	#REF!	#REF!	#REF!	#REF!			0.100483	0.171544	22.2941	22.5661	0.00512896	0.00875617	1.13796	1.15185	#REF!	#REF!	#REF!	#REF!	#REF!	#REF!	#REF!	#REF!	#REF!	#REF!	#REF!	#REF!
						19537.8	-46646.4		1.07458e+06	-899239	175342		Sabine Point	0.00278	0.0115	0.00271	#REF!	#REF!	#REF!	#REF!			0.100483	0.171544	22.2941	22.5661	0.00512896	0.00875617	1.13796	1.15185	#REF!	#REF!	#REF!	#REF!	#REF!	#REF!	#REF!	#REF!	#REF!	#REF!	#REF!	#REF!
						21094.5	-33229.2		506268	-821235	-314968		Sabine Point	0.00278	0.0115	0.00271	#REF!	#REF!	#REF!	#REF!			0.100483	0.171544	22.2941	22.5661	0.00512896	0.00875617	1.13796	1.15185	#REF!	#REF!	#REF!	#REF!	#REF!	#REF!	#REF!	#REF!	#REF!	#REF!	#REF!	#REF!
						2203.1	-1828.58		160826	0	160826		Sabine Point	0.00278	0.0115	0.00271	#REF!	#REF!	#REF!	#REF!			0.100483	0.171544	22.2941	22.5661	0.00512896	0.00875617	1.13796	1.15185	#REF!	#REF!	#REF!	#REF!	#REF!	#REF!	#REF!	#REF!	#REF!	#REF!	#REF!	#REF!
						55927.1	-89350.4		1.56596e+06	-1.42961e+06	136352		Sabine Point E	0.00278	0.0115	0.00271	#REF!	#REF!	#REF!	#REF!			0.109325	0.125917	13.0693	13.3045	0.00929151	0.0107016	1.11075	1.13074	#REF!	#REF!	#REF!	#REF!	#REF!	#REF!	#REF!	#REF!	#REF!	#REF!	#REF!	#REF!
						108528	-214998		3.14731e+06	-3.06928e+06	78032.8		Sabine Point E	0.00278	0.0115	0.00271	#REF!	#REF!	#REF!	#REF!			0.109325	0.125917	13.0693	13.3045	0.00929151	0.0107016	1.11075	1.13074	#REF!	#REF!	#REF!	#REF!	#REF!	#REF!	#REF!	#REF!	#REF!	#REF!	#REF!	#REF!
						123127	-514894		3.57068e+06	-7.35055e+06	-3.77987e+06		Sabine Point E	0.00278	0.0115	0.00271	#REF!	#REF!	#REF!	#REF!			0.109325	0.125917	13.0693	13.3045	0.00929151	0.0107016	1.11075	1.13074	#REF!	#REF!	#REF!	#REF!	#REF!	#REF!	#REF!	#REF!	#REF!	#REF!	#REF!	#REF!
						41040.6	-78360.7		1.19018e+06	-1.11867e+06	71510.8		Sabine Point E	0.00278	0.0115	0.00271	#REF!	#REF!	#REF!	#REF!			0.109325	0.125917	13.0693	13.3045	0.00929151	0.0107016	1.11075	1.13074	#REF!	#REF!	#REF!	#REF!	#REF!	#REF!	#REF!	#REF!	#REF!	#REF!	#REF!	#REF!
						41534	-168712		1.20449e+06	-2.40851e+06	-1.20403e+06		Sabine Point W	0.00278	0.0115	0.00271	#REF!	#REF!	#REF!	#REF!			0.109325	0	15.5792	15.6885	0.00593749	0	0.84611	0.852048	#REF!	#REF!	#REF!	#REF!	#REF!	#REF!	#REF!	#REF!	#REF!	#REF!	#REF!	#REF!
						56344.7	-19720.6		1.634e+06	0	1.634e+06		Sabine Point W	0.00278	0.0115	0.00271	#REF!	#REF!	#REF!	#REF!			0.109325	0	15.5792	15.6885	0.00593749	0	0.84611	0.852048	#REF!	#REF!	#REF!	#REF!	#REF!	#REF!	#REF!	#REF!	#REF!	#REF!	#REF!	#REF!
						4518.9	2123.88		131048	30320.2	161368		Shingle Point W	0.00278	0.0115	0.00271	#REF!	#REF!	#REF!	#REF!			0.284444	0.109964	16.9676	17.362	0.0315778	0.0122078	1.88367	1.92746	#REF!	#REF!	#REF!	#REF!	#REF!	#REF!	#REF!	#REF!	#REF!	#REF!	#REF!	#REF!
						54199.1	-34145.4		1.57177e+06	0	1.57177e+06		Shingle Point W	0.00278	0.0115	0.00271	#REF!	#REF!	#REF!	#REF!			0.284444	0.109964	16.9676	17.362	0.0315778	0.0122078	1.88367	1.92746	#REF!	#REF!	#REF!	#REF!	#REF!	#REF!	#REF!	#REF!	#REF!	#REF!	#REF!	#REF!
						23036.6	-48629.9		668061	-694234	-26173.1		Shingle Point W	0.00278	0.0115	0.00271	#REF!	#REF!	#REF!	#REF!			0.284444	0.109964	16.9676	17.362	0.0315778	0.0122078	1.88367	1.92746	#REF!	#REF!	#REF!	#REF!	#REF!	#REF!	#REF!	#REF!	#REF!	#REF!	#REF!	#REF!
						9954.9	11448.1		467880	183170	651051		Shingle Point W	0.00278	0.0115	0.00271	#REF!	#REF!	#REF!	#REF!			0.284444	0.109964	16.9676	17.362	0.0315778	0.0122078	1.88367	1.92746	#REF!	#REF!	#REF!	#REF!	#REF!	#REF!	#REF!	#REF!	#REF!	#REF!	#REF!	#REF!
						5685.3	170.559		267209	2728.94	269938		Shingle Point W	0.00278	0.0115	0.00271	#REF!	#REF!	#REF!	#REF!			0.284444	0.109964	16.9676	17.362	0.0315778	0.0122078	1.88367	1.92746	#REF!	#REF!	#REF!	#REF!	#REF!	#REF!	#REF!	#REF!	#REF!	#REF!	#REF!	#REF!
						620.18	390.713		28528.3	6153.73	34682		Shingle Point W	0.00278	0.0115	0.00271	#REF!	#REF!	#REF!	#REF!			0.284444	0.109964	16.9676	17.362	0.0315778	0.0122078	1.88367	1.92746	#REF!	#REF!	#REF!	#REF!	#REF!	#REF!	#REF!	#REF!	#REF!	#REF!	#REF!	#REF!
						4554.37	364.35		268708	7520.55	276228		Shingle Point W	0.00278	0.0115	0.00271	#REF!	#REF!	#REF!	#REF!			0.284444	0.109964	16.9676	17.362	0.0315778	0.0122078	1.88367	1.92746	#REF!	#REF!	#REF!	#REF!	#REF!	#REF!	#REF!	#REF!	#REF!	#REF!	#REF!	#REF!
						31875.6	22950.4		1.11565e+06	246029	1.36167e+06		Shingle Point W	0.00278	0.0115	0.00271	#REF!	#REF!	#REF!	#REF!			0.284444	0.109964	16.9676	17.362	0.0315778	0.0122078	1.88367	1.92746	#REF!	#REF!	#REF!	#REF!	#REF!	#REF!	#REF!	#REF!	#REF!	#REF!	#REF!	#REF!
						4095.53	4136.48		143343	44343.1	187686		Shingle Point W	0.00278	0.0115	0.00271	#REF!	#REF!	#REF!	#REF!			0.284444	0.109964	16.9676	17.362	0.0315778	0.0122078	1.88367	1.92746	#REF!	#REF!	#REF!	#REF!	#REF!	#REF!	#REF!	#REF!	#REF!	#REF!	#REF!	#REF!
						16841.6	-65968.6		589457	-707184	-117727		Shingle Point W	0.00278	0.0115	0.00271	#REF!	#REF!	#REF!	#REF!			0.284444	0.109964	16.9676	17.362	0.0315778	0.0122078	1.88367	1.92746	#REF!	#REF!	#REF!	#REF!	#REF!	#REF!	#REF!	#REF!	#REF!	#REF!	#REF!	#REF!
						17787.5	214339		622561	2.29771e+06	2.92027e+06		Shingle Point W	0.00278	0.0115	0.00271	#REF!	#REF!	#REF!	#REF!			0.284444	0.109964	16.9676	17.362	0.0315778	0.0122078	1.88367	1.92746	#REF!	#REF!	#REF!	#REF!	#REF!	#REF!	#REF!	#REF!	#REF!	#REF!	#REF!	#REF!
						43708	-34092.3		1.52978e+06	0	1.52978e+06		Shingle Point W	0.00278	0.0115	0.00271	#REF!	#REF!	#REF!	#REF!			0.284444	0.109964	16.9676	17.362	0.0315778	0.0122078	1.88367	1.92746	#REF!	#REF!	#REF!	#REF!	#REF!	#REF!	#REF!	#REF!	#REF!	#REF!	#REF!	#REF!
						27686.5	-104810		1.6335e+06	-2.1634e+06	-529892		Shingle Point W	0.00278	0.0115	0.00271	#REF!	#REF!	#REF!	#REF!			0.284444	0.109964	16.9676	17.362	0.0315778	0.0122078	1.88367	1.92746	#REF!	#REF!	#REF!	#REF!	#REF!	#REF!	#REF!	#REF!	#REF!	#REF!	#REF!	#REF!
						424.945	182.726		13173.3	1411.97	14585.3		Shingle Point W	0.00278	0.0115	0.00271	#REF!	#REF!	#REF!	#REF!			0.284444	0.109964	16.9676	17.362	0.0315778	0.0122078	1.88367	1.92746	#REF!	#REF!	#REF!	#REF!	#REF!	#REF!	#REF!	#REF!	#REF!	#REF!	#REF!	#REF!
						35965.6	259312		1.11493e+06	2.00378e+06	3.11871e+06		Shingle Point W	0.00278	0.0115	0.00271	#REF!	#REF!	#REF!	#REF!			0.284444	0.109964	16.9676	17.362	0.0315778	0.0122078	1.88367	1.92746	#REF!	#REF!	#REF!	#REF!	#REF!	#REF!	#REF!	#REF!	#REF!	#REF!	#REF!	#REF!
						51395	25697.5		2.0558e+06	379533	2.43533e+06		Shingle Point W	0.00278	0.0115	0.00271	#REF!	#REF!	#REF!	#REF!			0.284444	0.109964	16.9676	17.362	0.0315778	0.0122078	1.88367	1.92746	#REF!	#REF!	#REF!	#REF!	#REF!	#REF!	#REF!	#REF!	#REF!	#REF!	#REF!	#REF!
						10828.3	-26546.7		314020	-378976	-64956.7		Shingle Point W	0.00278	0.0115	0.00271	#REF!	#REF!	#REF!	#REF!			0.284444	0.109964	16.9676	17.362	0.0315778	0.0122078	1.88367	1.92746	#REF!	#REF!	#REF!	#REF!	#REF!	#REF!	#REF!	#REF!	#REF!	#REF!	#REF!	#REF!
						6647.37	-1528.89		192774	0	192774		Shingle Point W	0.00278	0.0115	0.00271	#REF!	#REF!	#REF!	#REF!			0.284444	0.109964	16.9676	17.362	0.0315778	0.0122078	1.88367	1.92746	#REF!	#REF!	#REF!	#REF!	#REF!	#REF!	#REF!	#REF!	#REF!	#REF!	#REF!	#REF!
						14431.3	13998.4		418509	199839	618348		Shingle Point W	0.00278	0.0115	0.00271	#REF!	#REF!	#REF!	#REF!			0.284444	0.109964	16.9676	17.362	0.0315778	0.0122078	1.88367	1.92746	#REF!	#REF!	#REF!	#REF!	#REF!	#REF!	#REF!	#REF!	#REF!	#REF!	#REF!	#REF!
						22105.5	99916.9		641060	1.4264e+06	2.06746e+06		Shingle Point W	0.00278	0.0115	0.00271	#REF!	#REF!	#REF!	#REF!			0.284444	0.109964	16.9676	17.362	0.0315778	0.0122078	1.88367	1.92746	#REF!	#REF!	#REF!	#REF!	#REF!	#REF!	#REF!	#REF!	#REF!	#REF!	#REF!	#REF!
						8447.17	15289.4		287204	173917	461121		Shingle Point W	0.00278	0.0115	0.00271	#REF!	#REF!	#REF!	#REF!			0.284444	0.109964	16.9676	17.362	0.0315778	0.0122078	1.88367	1.92746	#REF!	#REF!	#REF!	#REF!	#REF!	#REF!	#REF!	#REF!	#REF!	#REF!	#REF!	#REF!
						54987.7	218851		1.86958e+06	2.48943e+06	4.35901e+06		Shingle Point W	0.00278	0.0115	0.00271	#REF!	#REF!	#REF!	#REF!			0.284444	0.109964	16.9676	17.362	0.0315778	0.0122078	1.88367	1.92746	#REF!	#REF!	#REF!	#REF!	#REF!	#REF!	#REF!	#REF!	#REF!	#REF!	#REF!	#REF!
						9762.51	39831		331925	453078	785003		Shingle Point W	0.00278	0.0115	0.00271	#REF!	#REF!	#REF!	#REF!			0.284444	0.109964	16.9676	17.362	0.0315778	0.0122078	1.88367	1.92746	#REF!	#REF!	#REF!	#REF!	#REF!	#REF!	#REF!	#REF!	#REF!	#REF!	#REF!	#REF!
						1068.79	181.695		36338.9	2066.78	38405.7		Shingle Point W	0.00278	0.0115	0.00271	#REF!	#REF!	#REF!	#REF!			0.284444	0.109964	16.9676	17.362	0.0315778	0.0122078	1.88367	1.92746	#REF!	#REF!	#REF!	#REF!	#REF!	#REF!	#REF!	#REF!	#REF!	#REF!	#REF!	#REF!
						818.067	-793.525		59718.9	0	59718.9		Shingle Point W	0.00278	0.0115	0.00271	#REF!	#REF!	#REF!	#REF!			0.284444	0.109964	16.9676	17.362	0.0315778	0.0122078	1.88367	1.92746	#REF!	#REF!	#REF!	#REF!	#REF!	#REF!	#REF!	#REF!	#REF!	#REF!	#REF!	#REF!
						448.036	-2437.79		32706.6	-45621.6	-12914.9		Shingle Point W	0.00278	0.0115	0.00271	#REF!	#REF!	#REF!	#REF!			0.284444	0.109964	16.9676	17.362	0.0315778	0.0122078	1.88367	1.92746	#REF!	#REF!	#REF!	#REF!	#REF!	#REF!	#REF!	#REF!	#REF!	#REF!	#REF!	#REF!
						8858.72	6023.93		407501	94876.9	502378		Shingle Point W	0.00278	0.0115	0.00271	#REF!	#REF!	#REF!	#REF!			0.284444	0.109964	16.9676	17.362	0.0315778	0.0122078	1.88367	1.92746	#REF!	#REF!	#REF!	#REF!	#REF!	#REF!	#REF!	#REF!	#REF!	#REF!	#REF!	#REF!
						9351.62	1028.68		289900	7948.88	297849		Shingle Point W	0.00278	0.0115	0.00271	#REF!	#REF!	#REF!	#REF!			0.284444	0.109964	16.9676	17.362	0.0315778	0.0122078	1.88367	1.92746	#REF!	#REF!	#REF!	#REF!	#REF!	#REF!	#REF!	#REF!	#REF!	#REF!	#REF!	#REF!
						13923	7100.72		403766	101369	505135		Shingle Point W	0.00278	0.0115	0.00271	#REF!	#REF!	#REF!	#REF!			0.284444	0.109964	16.9676	17.362	0.0315778	0.0122078	1.88367	1.92746	#REF!	#REF!	#REF!	#REF!	#REF!	#REF!	#REF!	#REF!	#REF!	#REF!	#REF!	#REF!
						34257.6	-25693.2		993470	0	993470		Shingle Point W	0.00278	0.0115	0.00271	#REF!	#REF!	#REF!	#REF!			0.284444	0.109964	16.9676	17.362	0.0315778	0.0122078	1.88367	1.92746	#REF!	#REF!	#REF!	#REF!	#REF!	#REF!	#REF!	#REF!	#REF!	#REF!	#REF!	#REF!
						103224	-221865		2.9935e+06	-3.16731e+06	-173812		Shingle Point W	0.00278	0.0115	0.00271	#REF!	#REF!	#REF!	#REF!			0.284444	0.109964	16.9676	17.362	0.0315778	0.0122078	1.88367	1.92746	#REF!	#REF!	#REF!	#REF!	#REF!	#REF!	#REF!	#REF!	#REF!	#REF!	#REF!	#REF!
						91172.1	-36468.8		2.64399e+06	0	2.64399e+06		Shingle Point W	0.00278	0.0115	0.00271	#REF!	#REF!	#REF!	#REF!			0.284444	0.109964	16.9676	17.362	0.0315778	0.0122078	1.88367	1.92746	#REF!	#REF!	#REF!	#REF!	#REF!	#REF!	#REF!	#REF!	#REF!	#REF!	#REF!	#REF!
						459.828	-593.179		12875.2	-9490.86	3384.34		Shingle Point W	0.00278	0.0115	0.00271	#REF!	#REF!	#REF!	#REF!			0.284444	0.109964	16.9676	17.362	0.0315778	0.0122078	1.88367	1.92746	#REF!	#REF!	#REF!	#REF!	#REF!	#REF!	#REF!	#REF!	#REF!	#REF!	#REF!	#REF!
						3939.47	1930.34		165458	29384.1	194842		Shingle Point W	0.00278	0.0115	0.00271	#REF!	#REF!	#REF!	#REF!			0.284444	0.109964	16.9676	17.362	0.0315778	0.0122078	1.88367	1.92746	#REF!	#REF!	#REF!	#REF!	#REF!	#REF!	#REF!	#REF!	#REF!	#REF!	#REF!	#REF!
						1121.17	280.292		81845.2	5245.46	87090.7		Shingle Point W	0.00278	0.0115	0.00271	#REF!	#REF!	#REF!	#REF!			0.284444	0.109964	16.9676	17.362	0.0315778	0.0122078	1.88367	1.92746	#REF!	#REF!	#REF!	#REF!	#REF!	#REF!	#REF!	#REF!	#REF!	#REF!	#REF!	#REF!
						20760.2	1453.21		1.14181e+06	28014.7	1.16982e+06		Shingle Point W	0.00278	0.0115	0.00271	#REF!	#REF!	#REF!	#REF!			0.284444	0.109964	16.9676	17.362	0.0315778	0.0122078	1.88367	1.92746	#REF!	#REF!	#REF!	#REF!	#REF!	#REF!	#REF!	#REF!	#REF!	#REF!	#REF!	#REF!
						2435.76	-9304.82		177811	-174133	3677.78		Shingle Point W	0.00278	0.0115	0.00271	#REF!	#REF!	#REF!	#REF!			0.284444	0.109964	16.9676	17.362	0.0315778	0.0122078	1.88367	1.92746	#REF!	#REF!	#REF!	#REF!	#REF!	#REF!	#REF!	#REF!	#REF!	#REF!	#REF!	#REF!
						751.479	-2153.45		54857.9	-40300.2	14557.7		Shingle Point W	0.00278	0.0115	0.00271	#REF!	#REF!	#REF!	#REF!			0.284444	0.109964	16.9676	17.362	0.0315778	0.0122078	1.88367	1.92746	#REF!	#REF!	#REF!	#REF!	#REF!	#REF!	#REF!	#REF!	#REF!	#REF!	#REF!	#REF!
						1546.87	-4389.02		44859.1	-62657.1	-17798		Shingle Point W	0.00278	0.0115	0.00271	#REF!	#REF!	#REF!	#REF!			0.284444	0.109964	16.9676	17.362	0.0315778	0.0122078	1.88367	1.92746	#REF!	#REF!	#REF!	#REF!	#REF!	#REF!	#REF!	#REF!	#REF!	#REF!	#REF!	#REF!
						4708.7	7581.01		136552	108226	244778		Shingle Point W	0.00278	0.0115	0.00271	#REF!	#REF!	#REF!	#REF!			0.284444	0.109964	16.9676	17.362	0.0315778	0.0122078	1.88367	1.92746	#REF!	#REF!	#REF!	#REF!	#REF!	#REF!	#REF!	#REF!	#REF!	#REF!	#REF!	#REF!
						71441.5	220040		2.85766e+06	3.24982e+06	6.10748e+06		Shingle Point W	0.00278	0.0115	0.00271	#REF!	#REF!	#REF!	#REF!			0.284444	0.109964	16.9676	17.362	0.0315778	0.0122078	1.88367	1.92746	#REF!	#REF!	#REF!	#REF!	#REF!	#REF!	#REF!	#REF!	#REF!	#REF!	#REF!	#REF!
						40931.2	19237.6		1.187e+06	274634	1.46164e+06		Shingle Point W	0.00278	0.0115	0.00271	#REF!	#REF!	#REF!	#REF!			0.284444	0.109964	16.9676	17.362	0.0315778	0.0122078	1.88367	1.92746	#REF!	#REF!	#REF!	#REF!	#REF!	#REF!	#REF!	#REF!	#REF!	#REF!	#REF!	#REF!
						1930.31	-7373.94		140913	-137998	2914.51		Shingle Point W	0.00278	0.0115	0.00271	#REF!	#REF!	#REF!	#REF!			0.284444	0.109964	16.9676	17.362	0.0315778	0.0122078	1.88367	1.92746	#REF!	#REF!	#REF!	#REF!	#REF!	#REF!	#REF!	#REF!	#REF!	#REF!	#REF!	#REF!
						178.28	-171.148		7487.74	0	7487.74		Shingle Point W	0.00278	0.0115	0.00271	#REF!	#REF!	#REF!	#REF!			0.284444	0.109964	16.9676	17.362	0.0315778	0.0122078	1.88367	1.92746	#REF!	#REF!	#REF!	#REF!	#REF!	#REF!	#REF!	#REF!	#REF!	#REF!	#REF!	#REF!
						784.814	-753.421		32962.2	0	32962.2		Shingle Point W	0.00278	0.0115	0.00271	#REF!	#REF!	#REF!	#REF!			0.284444	0.109964	16.9676	17.362	0.0315778	0.0122078	1.88367	1.92746	#REF!	#REF!	#REF!	#REF!	#REF!	#REF!	#REF!	#REF!	#REF!	#REF!	#REF!	#REF!
						49351.1	184080		1.43118e+06	2.6279e+06	4.05908e+06		Shingle Point W	0.00278	0.0115	0.00271	#REF!	#REF!	#REF!	#REF!			0.284444	0.109964	16.9676	17.362	0.0315778	0.0122078	1.88367	1.92746	#REF!	#REF!	#REF!	#REF!	#REF!	#REF!	#REF!	#REF!	#REF!	#REF!	#REF!	#REF!
						20936.7	14027.6		607164	200256	807420		Shingle Point W	0.00278	0.0115	0.00271	#REF!	#REF!	#REF!	#REF!			0.284444	0.109964	16.9676	17.362	0.0315778	0.0122078	1.88367	1.92746	#REF!	#REF!	#REF!	#REF!	#REF!	#REF!	#REF!	#REF!	#REF!	#REF!	#REF!	#REF!
						9563.48	2486.5		277341	35497	312838		Shingle Point W	0.00278	0.0115	0.00271	#REF!	#REF!	#REF!	#REF!			0.284444	0.109964	16.9676	17.362	0.0315778	0.0122078	1.88367	1.92746	#REF!	#REF!	#REF!	#REF!	#REF!	#REF!	#REF!	#REF!	#REF!	#REF!	#REF!	#REF!
						4640.31	-13166.3		134569	-187960	-53390.8		Shingle Point W	0.00278	0.0115	0.00271	#REF!	#REF!	#REF!	#REF!			0.284444	0.109964	16.9676	17.362	0.0315778	0.0122078	1.88367	1.92746	#REF!	#REF!	#REF!	#REF!	#REF!	#REF!	#REF!	#REF!	#REF!	#REF!	#REF!	#REF!
						1292.39	-1292.39		45233.6	-13854.4	31379.2		Shingle Point W	0.00278	0.0115	0.00271	#REF!	#REF!	#REF!	#REF!			0.284444	0.109964	16.9676	17.362	0.0315778	0.0122078	1.88367	1.92746	#REF!	#REF!	#REF!	#REF!	#REF!	#REF!	#REF!	#REF!	#REF!	#REF!	#REF!	#REF!
						1943.19	-1943.19		68011.5	-20831	47180.6		Shingle Point W	0.00278	0.0115	0.00271	#REF!	#REF!	#REF!	#REF!			0.284444	0.109964	16.9676	17.362	0.0315778	0.0122078	1.88367	1.92746	#REF!	#REF!	#REF!	#REF!	#REF!	#REF!	#REF!	#REF!	#REF!	#REF!	#REF!	#REF!
						1302.5	-1302.5		45587.4	-13962.8	31624.7		Shingle Point W	0.00278	0.0115	0.00271	#REF!	#REF!	#REF!	#REF!			0.284444	0.109964	16.9676	17.362	0.0315778	0.0122078	1.88367	1.92746	#REF!	#REF!	#REF!	#REF!	#REF!	#REF!	#REF!	#REF!	#REF!	#REF!	#REF!	#REF!
						1267.62	-1267.62		44366.7	-13588.9	30777.8		Shingle Point W	0.00278	0.0115	0.00271	#REF!	#REF!	#REF!	#REF!			0.284444	0.109964	16.9676	17.362	0.0315778	0.0122078	1.88367	1.92746	#REF!	#REF!	#REF!	#REF!	#REF!	#REF!	#REF!	#REF!	#REF!	#REF!	#REF!	#REF!
						1431.27	-1431.27		50094.6	-15343.3	34751.3		Shingle Point W	0.00278	0.0115	0.00271	#REF!	#REF!	#REF!	#REF!			0.284444	0.109964	16.9676	17.362	0.0315778	0.0122078	1.88367	1.92746	#REF!	#REF!	#REF!	#REF!	#REF!	#REF!	#REF!	#REF!	#REF!	#REF!	#REF!	#REF!
						1243.65	-1243.65		43527.8	-13331.9	30195.9		Shingle Point W	0.00278	0.0115	0.00271	#REF!	#REF!	#REF!	#REF!			0.284444	0.109964	16.9676	17.362	0.0315778	0.0122078	1.88367	1.92746	#REF!	#REF!	#REF!	#REF!	#REF!	#REF!	#REF!	#REF!	#REF!	#REF!	#REF!	#REF!
						1859.32	-1859.32		65076.1	-19931.9	45144.2		Shingle Point W	0.00278	0.0115	0.00271	#REF!	#REF!	#REF!	#REF!			0.284444	0.109964	16.9676	17.362	0.0315778	0.0122078	1.88367	1.92746	#REF!	#REF!	#REF!	#REF!	#REF!	#REF!	#REF!	#REF!	#REF!	#REF!	#REF!	#REF!
						1373.9	-1373.9		48086.4	-14728.2	33358.2		Shingle Point W	0.00278	0.0115	0.00271	#REF!	#REF!	#REF!	#REF!			0.284444	0.109964	16.9676	17.362	0.0315778	0.0122078	1.88367	1.92746	#REF!	#REF!	#REF!	#REF!	#REF!	#REF!	#REF!	#REF!	#REF!	#REF!	#REF!	#REF!
						136.265	-136.265		4769.26	-1460.76	3308.51		Shingle Point W	0.00278	0.0115	0.00271	#REF!	#REF!	#REF!	#REF!			0.284444	0.109964	16.9676	17.362	0.0315778	0.0122078	1.88367	1.92746	#REF!	#REF!	#REF!	#REF!	#REF!	#REF!	#REF!	#REF!	#REF!	#REF!	#REF!	#REF!
						468.921	-468.921		16412.2	-5026.83	11385.4		Shingle Point W	0.00278	0.0115	0.00271	#REF!	#REF!	#REF!	#REF!			0.284444	0.109964	16.9676	17.362	0.0315778	0.0122078	1.88367	1.92746	#REF!	#REF!	#REF!	#REF!	#REF!	#REF!	#REF!	#REF!	#REF!	#REF!	#REF!	#REF!
						982.808	-982.808		34398.3	-10535.7	23862.6		Shingle Point W	0.00278	0.0115	0.00271	#REF!	#REF!	#REF!	#REF!			0.284444	0.109964	16.9676	17.362	0.0315778	0.0122078	1.88367	1.92746	#REF!	#REF!	#REF!	#REF!	#REF!	#REF!	#REF!	#REF!	#REF!	#REF!	#REF!	#REF!
						112.151	-112.151		3925.3	-1202.26	2723.04		Shingle Point W	0.00278	0.0115	0.00271	#REF!	#REF!	#REF!	#REF!			0.284444	0.109964	16.9676	17.362	0.0315778	0.0122078	1.88367	1.92746	#REF!	#REF!	#REF!	#REF!	#REF!	#REF!	#REF!	#REF!	#REF!	#REF!	#REF!	#REF!
						101.332	-101.332		3546.63	-1086.28	2460.35		Shingle Point W	0.00278	0.0115	0.00271	#REF!	#REF!	#REF!	#REF!			0.284444	0.109964	16.9676	17.362	0.0315778	0.0122078	1.88367	1.92746	#REF!	#REF!	#REF!	#REF!	#REF!	#REF!	#REF!	#REF!	#REF!	#REF!	#REF!	#REF!
						126.699	-126.699		4434.47	-1358.21	3076.25		Shingle Point W	0.00278	0.0115	0.00271	#REF!	#REF!	#REF!	#REF!			0.284444	0.109964	16.9676	17.362	0.0315778	0.0122078	1.88367	1.92746	#REF!	#REF!	#REF!	#REF!	#REF!	#REF!	#REF!	#REF!	#REF!	#REF!	#REF!	#REF!
						503.202	-503.202		17612.1	-5394.33	12217.7		Shingle Point W	0.00278	0.0115	0.00271	#REF!	#REF!	#REF!	#REF!			0.284444	0.109964	16.9676	17.362	0.0315778	0.0122078	1.88367	1.92746	#REF!	#REF!	#REF!	#REF!	#REF!	#REF!	#REF!	#REF!	#REF!	#REF!	#REF!	#REF!
						263.572	-263.572		9225.01	-2825.49	6399.52		Shingle Point W	0.00278	0.0115	0.00271	#REF!	#REF!	#REF!	#REF!			0.284444	0.109964	16.9676	17.362	0.0315778	0.0122078	1.88367	1.92746	#REF!	#REF!	#REF!	#REF!	#REF!	#REF!	#REF!	#REF!	#REF!	#REF!	#REF!	#REF!
						582.03	-582.03		20371	-6239.36	14131.7		Shingle Point W	0.00278	0.0115	0.00271	#REF!	#REF!	#REF!	#REF!			0.284444	0.109964	16.9676	17.362	0.0315778	0.0122078	1.88367	1.92746	#REF!	#REF!	#REF!	#REF!	#REF!	#REF!	#REF!	#REF!	#REF!	#REF!	#REF!	#REF!
						837.246	-837.246		29303.6	-8975.28	20328.3		Shingle Point W	0.00278	0.0115	0.00271	#REF!	#REF!	#REF!	#REF!			0.284444	0.109964	16.9676	17.362	0.0315778	0.0122078	1.88367	1.92746	#REF!	#REF!	#REF!	#REF!	#REF!	#REF!	#REF!	#REF!	#REF!	#REF!	#REF!	#REF!
						1024.64	-1024.64		35862.3	-10984.1	24878.2		Shingle Point W	0.00278	0.0115	0.00271	#REF!	#REF!	#REF!	#REF!			0.284444	0.109964	16.9676	17.362	0.0315778	0.0122078	1.88367	1.92746	#REF!	#REF!	#REF!	#REF!	#REF!	#REF!	#REF!	#REF!	#REF!	#REF!	#REF!	#REF!
						805.666	-805.666		28198.3	-8636.74	19561.6		Shingle Point W	0.00278	0.0115	0.00271	#REF!	#REF!	#REF!	#REF!			0.284444	0.109964	16.9676	17.362	0.0315778	0.0122078	1.88367	1.92746	#REF!	#REF!	#REF!	#REF!	#REF!	#REF!	#REF!	#REF!	#REF!	#REF!	#REF!	#REF!
						764.073	-764.073		26742.6	-8190.86	18551.7		Shingle Point W	0.00278	0.0115	0.00271	#REF!	#REF!	#REF!	#REF!			0.284444	0.109964	16.9676	17.362	0.0315778	0.0122078	1.88367	1.92746	#REF!	#REF!	#REF!	#REF!	#REF!	#REF!	#REF!	#REF!	#REF!	#REF!	#REF!	#REF!
						163.461	-163.461		5721.12	-1752.3	3968.82		Shingle Point W	0.00278	0.0115	0.00271	#REF!	#REF!	#REF!	#REF!			0.284444	0.109964	16.9676	17.362	0.0315778	0.0122078	1.88367	1.92746	#REF!	#REF!	#REF!	#REF!	#REF!	#REF!	#REF!	#REF!	#REF!	#REF!	#REF!	#REF!
						128.679	-128.679		4503.76	-1379.44	3124.32		Shingle Point W	0.00278	0.0115	0.00271	#REF!	#REF!	#REF!	#REF!			0.284444	0.109964	16.9676	17.362	0.0315778	0.0122078	1.88367	1.92746	#REF!	#REF!	#REF!	#REF!	#REF!	#REF!	#REF!	#REF!	#REF!	#REF!	#REF!	#REF!
						217.637	-217.637		7617.3	-2333.07	5284.23		Shingle Point W	0.00278	0.0115	0.00271	#REF!	#REF!	#REF!	#REF!			0.284444	0.109964	16.9676	17.362	0.0315778	0.0122078	1.88367	1.92746	#REF!	#REF!	#REF!	#REF!	#REF!	#REF!	#REF!	#REF!	#REF!	#REF!	#REF!	#REF!
						1180.97	-1180.97		41334.1	-12660	28674.1		Shingle Point W	0.00278	0.0115	0.00271	#REF!	#REF!	#REF!	#REF!			0.284444	0.109964	16.9676	17.362	0.0315778	0.0122078	1.88367	1.92746	#REF!	#REF!	#REF!	#REF!	#REF!	#REF!	#REF!	#REF!	#REF!	#REF!	#REF!	#REF!
						5594.04	-5594.04		195791	-59968.1	135823		Shingle Point W	0.00278	0.0115	0.00271	#REF!	#REF!	#REF!	#REF!			0.284444	0.109964	16.9676	17.362	0.0315778	0.0122078	1.88367	1.92746	#REF!	#REF!	#REF!	#REF!	#REF!	#REF!	#REF!	#REF!	#REF!	#REF!	#REF!	#REF!
						21315	-21315		746024	-228497	517528		Shingle Point W	0.00278	0.0115	0.00271	#REF!	#REF!	#REF!	#REF!			0.284444	0.109964	16.9676	17.362	0.0315778	0.0122078	1.88367	1.92746	#REF!	#REF!	#REF!	#REF!	#REF!	#REF!	#REF!	#REF!	#REF!	#REF!	#REF!	#REF!
						2871.54	-2871.54		100504	-30782.9	69721.1		Stokes Point SE	0.00278	0.0115	0.00271	#REF!	#REF!	#REF!	#REF!			0.560292	0	25.8694	26.4297	0.00473047	0	0.218412	0.223142	#REF!	#REF!	#REF!	#REF!	#REF!	#REF!	#REF!	#REF!	#REF!	#REF!	#REF!	#REF!
						6162.62	-6162.62		215692	-66063.3	149628		Stokes Point SE	0.00278	0.0115	0.00271	#REF!	#REF!	#REF!	#REF!			0.560292	0	25.8694	26.4297	0.00473047	0	0.218412	0.223142	#REF!	#REF!	#REF!	#REF!	#REF!	#REF!	#REF!	#REF!	#REF!	#REF!	#REF!	#REF!
						5544.2	-5544.2		194047	-59433.9	134613		Stokes Point SE	0.00278	0.0115	0.00271	#REF!	#REF!	#REF!	#REF!			0.560292	0	25.8694	26.4297	0.00473047	0	0.218412	0.223142	#REF!	#REF!	#REF!	#REF!	#REF!	#REF!	#REF!	#REF!	#REF!	#REF!	#REF!	#REF!
						4685.15	-4685.15		163980	-50224.8	113755		Stokes Point SE	0.00278	0.0115	0.00271	#REF!	#REF!	#REF!	#REF!			0.560292	0	25.8694	26.4297	0.00473047	0	0.218412	0.223142	#REF!	#REF!	#REF!	#REF!	#REF!	#REF!	#REF!	#REF!	#REF!	#REF!	#REF!	#REF!
						2355.77	-2355.77		82452.1	-25253.9	57198.2		Stokes Point W	0.00278	0.0115	0.00271	#REF!	#REF!	#REF!	#REF!			0.336161	0.0713566	22.3868	22.7943	0.00737705	0.00156592	0.491278	0.500221	#REF!	#REF!	#REF!	#REF!	#REF!	#REF!	#REF!	#REF!	#REF!	#REF!	#REF!	#REF!
						4954.78	-4954.78		173417	-53115.3	120302		Stokes Point W	0.00278	0.0115	0.00271	#REF!	#REF!	#REF!	#REF!			0.336161	0.0713566	22.3868	22.7943	0.00737705	0.00156592	0.491278	0.500221	#REF!	#REF!	#REF!	#REF!	#REF!	#REF!	#REF!	#REF!	#REF!	#REF!	#REF!	#REF!
						4492.34	-4492.34		157232	-48157.9	109074		Stokes Point W	0.00278	0.0115	0.00271	#REF!	#REF!	#REF!	#REF!			0.336161	0.0713566	22.3868	22.7943	0.00737705	0.00156592	0.491278	0.500221	#REF!	#REF!	#REF!	#REF!	#REF!	#REF!	#REF!	#REF!	#REF!	#REF!	#REF!	#REF!
						14598.5	-14598.5		510947	-156496	354451		Stokes Point W	0.00278	0.0115	0.00271	#REF!	#REF!	#REF!	#REF!			0.336161	0.0713566	22.3868	22.7943	0.00737705	0.00156592	0.491278	0.500221	#REF!	#REF!	#REF!	#REF!	#REF!	#REF!	#REF!	#REF!	#REF!	#REF!	#REF!	#REF!
						37850.1	-37850.1		1.32476e+06	-405754	919002		Stokes Point W	0.00278	0.0115	0.00271	#REF!	#REF!	#REF!	#REF!			0.336161	0.0713566	22.3868	22.7943	0.00737705	0.00156592	0.491278	0.500221	#REF!	#REF!	#REF!	#REF!	#REF!	#REF!	#REF!	#REF!	#REF!	#REF!	#REF!	#REF!
						1551.77	-1551.77		54311.9	-16635	37677		Stokes Point W	0.00278	0.0115	0.00271	#REF!	#REF!	#REF!	#REF!			0.336161	0.0713566	22.3868	22.7943	0.00737705	0.00156592	0.491278	0.500221	#REF!	#REF!	#REF!	#REF!	#REF!	#REF!	#REF!	#REF!	#REF!	#REF!	#REF!	#REF!
						38901.2	-38901.2		1.36154e+06	-417020	944520		Stokes Point W	0.00278	0.0115	0.00271	#REF!	#REF!	#REF!	#REF!			0.336161	0.0713566	22.3868	22.7943	0.00737705	0.00156592	0.491278	0.500221	#REF!	#REF!	#REF!	#REF!	#REF!	#REF!	#REF!	#REF!	#REF!	#REF!	#REF!	#REF!
						794.503	-1239.42		23040.6	-17693.9	5346.73		Stokes Point W	0.00278	0.0115	0.00271	#REF!	#REF!	#REF!	#REF!			0.336161	0.0713566	22.3868	22.7943	0.00737705	0.00156592	0.491278	0.500221	#REF!	#REF!	#REF!	#REF!	#REF!	#REF!	#REF!	#REF!	#REF!	#REF!	#REF!	#REF!
						1119.62	-1746.61		32469	-24934.3	7534.66		Stokes Point W	0.00278	0.0115	0.00271	#REF!	#REF!	#REF!	#REF!			0.336161	0.0713566	22.3868	22.7943	0.00737705	0.00156592	0.491278	0.500221	#REF!	#REF!	#REF!	#REF!	#REF!	#REF!	#REF!	#REF!	#REF!	#REF!	#REF!	#REF!
						276.571	171.474		8020.55	2447.94	10468.5		Stokes Point W	0.00278	0.0115	0.00271	#REF!	#REF!	#REF!	#REF!			0.336161	0.0713566	22.3868	22.7943	0.00737705	0.00156592	0.491278	0.500221	#REF!	#REF!	#REF!	#REF!	#REF!	#REF!	#REF!	#REF!	#REF!	#REF!	#REF!	#REF!
						1097.31	680.329		31821.9	9712.29	41534.1		Stokes Point W	0.00278	0.0115	0.00271	#REF!	#REF!	#REF!	#REF!			0.336161	0.0713566	22.3868	22.7943	0.00737705	0.00156592	0.491278	0.500221	#REF!	#REF!	#REF!	#REF!	#REF!	#REF!	#REF!	#REF!	#REF!	#REF!	#REF!	#REF!
						454.052	-326.918		13167.5	0	13167.5		Stokes Point W	0.00278	0.0115	0.00271	#REF!	#REF!	#REF!	#REF!			0.336161	0.0713566	22.3868	22.7943	0.00737705	0.00156592	0.491278	0.500221	#REF!	#REF!	#REF!	#REF!	#REF!	#REF!	#REF!	#REF!	#REF!	#REF!	#REF!	#REF!
						418.918	460.81		12148.6	6578.45	18727.1		Whale Cove E	0.00278	0.0115	0.00271	#REF!	#REF!	#REF!	#REF!			1.1044	0.208812	9.48196	10.7952	0	0	0	0	#REF!	#REF!	#REF!	#REF!	#REF!	#REF!	#REF!	#REF!	#REF!	#REF!	#REF!	#REF!
													Whale Cove E	0.00278	0.0115	0.00271	#REF!	#REF!	#REF!	#REF!			1.1044	0.208812	9.48196	10.7952	0	0	0	0	#REF!	#REF!	#REF!	#REF!	#REF!	#REF!	#REF!	#REF!	#REF!	#REF!	#REF!	#REF!
													Workboat Passage W	0.00278	0.0115	0.00271	#REF!	#REF!	#REF!	#REF!			1.59829	0	17.8714	19.4697	0.00753403	0	0.084242	0.0917761	#REF!	#REF!	#REF!	#REF!	#REF!	#REF!	#REF!	#REF!	#REF!	#REF!	#REF!	#REF!
